# Supplementary material
Source: PubMed Central journal article supplement (PMC4618700)
Supplement: NIHMS728155-supplement-2.pdf [file NIHMS728155-supplement-2.pdf]

| Metabolite Name                 | Retention Index | Quantified Ion | BinBase ID | Mass spectra (m/z : intensity)            | KEGG ID | PubChem ID | proportion increased in tumors | % increased in tumors | O-PLS-DA model loading |
|---------------------------------|-----------------|----------------|------------|-------------------------------------------|---------|------------|--------------------------------|-----------------------|------------------------|
| ribitol                         | 576156          | 217            | 367970     | 3:13.0 185:36                             | C00474  | 827        | 35 / 39                        | 90                    | -0.1072                |
| 5,6-dihydrouracil               | 469713          | 243            | 308130     | 3:35.0 300:20                             | C00429  | 649        | 35 / 39                        | 90                    | -0.1115                |
| UDP GlcNAc                      | 623732          | 226            | 227600     | 46:3.0 147:17                             | C00043  | 445675     | 34 / 39                        | 87                    | -0.1239                |
| cytidine-5-monophosphate        | 975265          | 169            | 203268     | 2:80.0 143:24                             | C00055  | 6131       | 34 / 39                        | 87                    | -0.0248                |
| tocopherol alpha                | 1067178         | 237            | 199211     | 4.0 155:8.0 1                             | C02477  | 14985      | 32 / 39                        | 82                    | -0.0929                |
| glutamic acid                   | 528717          | 246            | 433267     | 49:3105.0 15                              | C00025  | 33032      | 32 / 39                        | 82                    | -0.0993                |
| fucose+ rhamnose                | 577861          | 117            | 205102     | 8.0 143:211.0                             | C01018  | 94270      | 32 / 39                        | 82                    | -0.0936                |
| 5'-deoxy-5'-methylthioadenosine | 967673          | 236            | 213373     | 0 146:6.0 147                             | C00170  | 439176     | 32 / 39                        | 82                    | -0.0980                |
| N-acetyl-D-mannosamine          | 723859          | 202            | 243111     | 1 157:2045.0                              | C00645  | 65150      | 31 / 39                        | 79                    | -0.0854                |
| cysteine                        | 501345          | 220            | 200918     | 159:6.0 160:1                             | C00097  | 594        | 31 / 39                        | 79                    | -0.0872                |
| arabinose                       | 546892          | 217            | 202065     | 8:100.0 159:1                             | C00259  | 229        | 30 / 39                        | 77                    | -0.0784                |
| xylitol                         | 566749          | 217            | 200524     | 2.0 169:3.0 17                            | C00379  | 6912       | 29 / 39                        | 74                    | -0.0699                |
| xanthine                        | 702391          | 353            | 203224     | 0 137:104.0                               | C00385  | 1188       | 29 / 39                        | 74                    | -0.1019                |
| gamma-tocopherol                | 1026222         | 223            | 202089     | 1.0 163:37.0                              | C02483  | 92729      | 29 / 39                        | 74                    | -0.0178                |
| arachidonic acid                | 835751          | 91             | 221544     | 0.0 144:21.0 145:322.0 146:               | 5312542 | 29 / 39    | 74                             | -0.0475               |                        |
| adenosine                       | 917818          | 236            | 211944     | 149:452.0 15                              | C00212  | 60961      | 29 / 39                        | 74                    | -0.0410                |
| trans-4-hydroxyproline          | 460567          | 158            | 199804     | 34:2.0 198:2.0                            | C01157  | 5810       | 28 / 39                        | 72                    | -0.0585                |
| nicotinamide                    | 470102          | 179            | 296490     | 1:802.0 178:60                            | C00153  | 936        | 28 / 39                        | 72                    | -0.0744                |
| glycerol-3-galactoside          | 801542          | 204            | 219508     | 6:3.0 204:123                             | C05401  | 656504     | 28 / 39                        | 72                    | -0.0433                |
| glycerol                        | 343749          | 205            | 207507     | 8.0 150:232.0                             | C00116  | 753        | 28 / 39                        | 72                    | -0.0485                |
| fucose                          | 584612          | 117            | 205106     | 5:0 180:7.0 1                             | C01019  | 94270      | 28 / 39                        | 72                    | -0.0706                |
| adenosine-5-phosphate           | 1038945         | 169            | 362124     | 2:64.0 216:42                             | C00020  | 6083       | 28 / 39                        | 72                    | -0.0860                |
| adenine                         | 646247          | 264            | 307666     | 52:296.0 164:                             | C00147  | 190        | 28 / 39                        | 72                    | -0.0857                |
| 2-hydroxyglutaric acid          | 507692          | 129            | 374016     | 0 151:11.0 15                             | C02630  | 43         | 28 / 39                        | 72                    | -0.0490                |
| uric acid                       | 730534          | 441            | 304993     | 67:117.0 168                              | C00366  | 1175       | 27 / 39                        | 69                    | -0.0826                |
| UDP-glucuronic acid             | 586393          | 217            | 328006     | 7:17509.0 148                             | C00167  | 17473      | 27 / 39                        | 69                    | -0.0822                |
| phenylpyruvic acid              | 516882          | 116            | 236874     | 5:272.0 157:9                             | C00166  | 997        | 27 / 39                        | 69                    | -0.0140                |
| isoleucine                      | 359190          | 158            | 214141     | 0 142:589.0                               | C00407  | 6306       | 27 / 39                        | 69                    | -0.0358                |
| inosine 5'-monophosphate        | 1017326         | 315            | 229187     | 83:151.0 185:                             | C00130  | 8582       | 27 / 39                        | 69                    | -0.0845                |
| creatinine                      | 502434          | 115            | 199603     | 3:1.0 169:1.0                             | C00791  | 588        | 27 / 39                        | 69                    | -0.0811                |
| 4-hydroxybutyric acid           | 325197          | 233            | 231100     | 121672.0 132                              | C00989  | 10413      | 27 / 39                        | 69                    | -0.1001                |
| uracil                          | 385903          | 99             | 199600     | 24.0 141:50.0                             | C00106  | 1174       | 26 / 39                        | 67                    | -0.0305                |
| proline                         | 364232          | 142            | 199611     | 222:3.0 223:1                             | C00148  | 145742     | 26 / 39                        | 67                    | -0.0507                |
| glyceric acid                   | 377001          | 189            | 199174     | 54.0 144:142.                             | C00258  | 439194     | 26 / 39                        | 67                    | -0.0450                |
| aminomalonic acid               | 455266          | 218            | 240264     | 771.0 165:10.                             | C00872  | 100714     | 26 / 39                        | 67                    | -0.0589                |
| alanine                         | 246015          | 116            | 241385     | 3.0 144:7751                              | C00041  | 5950       | 26 / 39                        | 67                    | -0.0433                |
| phosphoethanolamine             | 604454          | 100            | 199628     | 1:2.0 168:2.0 :                           | C00346  | 1015       | 25 / 39                        | 64                    | -0.0732                |
| phenylalanine                   | 538016          | 218            | 217642     | 1:43.0 138:2.0                            | C00079  | 6140       | 25 / 39                        | 64                    | -0.0117                |
| malic acid                      | 461034          | 233            | 247180     | 0 140:13.0 14                             | C00149  | 222656     | 25 / 39                        | 64                    | -0.0774                |
| leucine                         | 350582          | 158            | 211938     | 8:2016.0 159                              | C00123  | 6106       | 25 / 39                        | 64                    | 0.0087                 |
| isothreonic acid                | 490829          | 292            | 563314     | 0:150.0 151:5.0 152:22.0 154:20.0 156:67: |         |            | 25 / 39                        | 64                    | -0.0805                |
| hypoxanthine                    | 618133          | 265            | 410816     | 4.0 145:779.0                             | C00262  | 790        | 25 / 39                        | 64                    | 0.0096                 |
| glycerol-alpha-phosphate        | 591357          | 299            | 199419     | 0 150:65.0 151                            | C00093  | 754        | 25 / 39                        | 64                    | 0.0030                 |
| erythronic acid                 | 512521          | 218            | 212276     | 119.0 145:77.0 146:50.0 147               | 2781043 | 25 / 39    | 64                             | -0.0541               |                        |

|                          |         |     |        |                                           |        |         |         |    |         |
|--------------------------|---------|-----|--------|-------------------------------------------|--------|---------|---------|----|---------|
| asparagine               | 554276  | 116 | 372854 | 31:29.0 184:1                             | C00152 | 236     | 25 / 39 | 64 | -0.0037 |
| arabitol                 | 572600  | 307 | 417461 | 59995.0 134:2                             | C01904 | 94154   | 25 / 39 | 64 | -0.0987 |
| 3-phenyllactic acid      | 516416  | 193 | 213134 | 1.0 157:29.0 1                            | C05607 | 3848    | 25 / 39 | 64 | -0.0084 |
| 1-monopalmitin           | 901207  | 371 | 202859 | 0 145:483.0 146:121.0 147:1               |        | 14900   | 25 / 39 | 64 | -0.0258 |
| tyrosine                 | 670802  | 218 | 381469 | 48.0 181:24.                              | C00082 | 6057    | 24 / 39 | 62 | -0.0059 |
| trehalose                | 947837  | 191 | 199289 | 8.0 161:133.0                             | C01083 | 7427    | 24 / 39 | 62 | -0.0433 |
| taurine                  | 557250  | 326 | 234595 | 63.0 142:235                              | C00245 | 1123    | 24 / 39 | 62 | -0.0656 |
| oxoproline               | 489576  | 156 | 228006 | 0 136:102.0 1                             | C01879 | 7405    | 24 / 39 | 62 | -0.0679 |
| methionine               | 483977  | 176 | 210265 | 172:7.0 173:3                             | C00073 | 6137    | 24 / 39 | 62 | -0.0045 |
| methanolphosphate        | 287964  | 241 | 410813 | 2.0 161:230.0 163:31680.0 164:2720.0 165  |        |         | 24 / 39 | 62 | -0.0306 |
| linoleic acid            | 777102  | 337 | 199240 | 0 137:406.0 1                             | C01595 | 5280450 | 24 / 39 | 62 | 0.0049  |
| glycocyanine             | 511031  | 171 | 368038 | 0 182:102.0 185:588.0 186:1027.0 187:51   |        |         | 24 / 39 | 62 | -0.0371 |
| glycerol-beta-phosphate  | 574994  | 243 | 212582 | 1.0 194:30.0 1                            | C02979 | 2526    | 24 / 39 | 62 | -0.0549 |
| glutamine                | 599904  | 156 | 324855 | 1.0 200:34.0 2                            | C00064 | 5961    | 24 / 39 | 62 | 0.0027  |
| FAD                      | 585516  | 246 | 225859 | 7.0 149:4099.                             | C00016 | 643975  | 24 / 39 | 62 | -0.0263 |
| phosphoric acid          | 342472  | 314 | 218342 | 6984.0 148:1                              | C00009 | 1004    | 23 / 39 | 59 | -0.0323 |
| N-methylalanine          | 286258  | 130 | 205663 | 15.0 159:1.0 1                            | C02721 | 5288725 | 23 / 39 | 59 | -0.0125 |
| maltotriose              | 1177212 | 204 | 203245 | 0 150:44.0 1                              | C01835 | 92146   | 23 / 39 | 59 | -0.0636 |
| maltose                  | 955559  | 361 | 205510 | 9.0 161:91.0                              | C00208 | 6255    | 23 / 39 | 59 | -0.0431 |
| indole-3-lactate         | 764543  | 202 | 223518 | 0 343:25.0 34                             | C02043 | 92904   | 23 / 39 | 59 | -0.0285 |
| glycine                  | 364262  | 174 | 227957 | 519.0 150:36.                             | C00037 | 750     | 23 / 39 | 59 | -0.0421 |
| cellobiotol              | 956355  | 204 | 200508 | 2.0 156:14.0 157:194.0 158:               |        | 160514  | 23 / 39 | 59 | -0.0445 |
| 5-aminovaleric acid      | 536304  | 174 | 238442 | 143:215.0 14                              | C00431 | 138     | 23 / 39 | 59 | -0.0012 |
| uridine-5'-monophosphate | 979035  | 352 | 270802 | 0 1869.0 141:                             | C00105 | 6030    | 22 / 39 | 56 | -0.0170 |
| putrescine               | 588249  | 174 | 200452 | 90:2.0 194:1.                             | C00134 | 1045    | 22 / 39 | 56 | -0.0255 |
| pipecolic acid           | 403598  | 156 | 200382 | 66.0 144:70.0                             | C00408 | 439227  | 22 / 39 | 56 | -0.0236 |
| inosine                  | 897806  | 230 | 199606 | 7.0 139:85.0 1                            | C00294 | 6021    | 22 / 39 | 56 | -0.0005 |
| fructose                 | 644460  | 217 | 386192 | 12.0 191:117.                             | C00095 | 5984    | 22 / 39 | 56 | 0.0066  |
| threonic acid            | 497167  | 292 | 199262 | 5:652.0 206:1                             | C01620 | 439535  | 21 / 39 | 54 | -0.0187 |
| succinic acid            | 370518  | 247 | 199210 | 2.0 145:102.0                             | C00042 | 1110    | 21 / 39 | 54 | -0.0563 |
| pyrophosphate            | 546635  | 451 | 235832 | 0 148:14490                               | C00013 | 1023    | 21 / 39 | 54 | 0.0085  |
| maleimide                | 244928  | 154 | 200907 | 33.0 134:819.                             | C07272 | 10935   | 21 / 39 | 54 | -0.0061 |
| fumaric acid             | 390853  | 245 | 325032 | 283.0 157:21.                             | C00122 | 444972  | 21 / 39 | 54 | -0.0380 |
| ethanolamine             | 344330  | 174 | 368025 | 0 181:145.0 182:214.0 187:267.0 188:84.0  |        |         | 21 / 39 | 54 | -0.0156 |
| digalacturonic acid      | 956026  | 233 | 296148 | 9934.0 144:1273.0 145:1971                |        | 6857565 | 21 / 39 | 54 | -0.0281 |
| cytidine-5'-diphosphate  | 861380  | 217 | 203807 | 5:18.0 157:62                             | C00112 | 290     | 21 / 39 | 54 | -0.0188 |
| 5-hydroxynorvaline       | 494838  | 142 | 200384 | 8:27.0 139:32.0 140:90.0 14               |        | 95562   | 21 / 39 | 54 | -0.0214 |
| valine                   | 309905  | 144 | 227947 | 1.0 136:66.0 1                            | C00183 | 6287    | 20 / 39 | 51 | 0.0013  |
| thymine                  | 420134  | 255 | 236696 | 0 3099.0 141:                             | C00178 | 1135    | 20 / 39 | 51 | -0.0192 |
| threonine                | 408911  | 117 | 269656 | 0 150:768.0 1                             | C00188 | 6288    | 20 / 39 | 51 | -0.0245 |
| sorbitol                 | 667682  | 319 | 204185 | 0 177:6.0 17                              | C00794 | 5780    | 20 / 39 | 51 | 0.0229  |
| pseudo uridine           | 813829  | 217 | 213381 | 51:2.0 152:3:                             | C02067 | 15047   | 20 / 39 | 51 | 0.0203  |
| orotic acid              | 584723  | 254 | 237885 | 172.0 139:158                             | C00295 | 967     | 20 / 39 | 51 | -0.0175 |
| homoserine               | 444264  | 218 | 206163 | 13.0 177:6.0 1                            | C00263 | 12647   | 20 / 39 | 51 | -0.0208 |
| glucuronic acid          | 666401  | 333 | 353273 | 156:244.0 1                               | C00191 | 94715   | 20 / 39 | 51 | -0.0094 |
| behenic acid             | 919675  | 117 | 203290 | 1.0 146:211.0                             | C08281 | 8215    | 20 / 39 | 51 | 0.0203  |
| 3-hydroxybutanoic acid   | 278651  | 191 | 267654 | 0 147:259779                              | C01089 | 92135   | 20 / 39 | 51 | -0.0064 |
| xanthosine               | 924754  | 325 | 237801 | 4.0 265:115.0                             | C01762 | 64959   | 19 / 39 | 49 | 0.0013  |
| salicylaldehyde          | 406706  | 193 | 228532 | 732.0 148:27:                             | C06202 | 6998    | 19 / 39 | 49 | 0.0381  |
| ribose                   | 553411  | 307 | 204210 | 0 172:251.0 1                             | C00121 | 5779    | 19 / 39 | 49 | -0.0041 |
| ribonic acid             | 598019  | 292 | 199341 | 759.0 205:5                               | C01685 | 5460677 | 19 / 39 | 49 | -0.0030 |
| myo-inositol             | 729867  | 305 | 199164 | 3342.0 135:5                              | C00137 | 892     | 19 / 39 | 49 | -0.0252 |
| levoglucosan             | 569799  | 204 | 199201 | 0 143:451.0 144:40.0 145:48               |        | 2724705 | 19 / 39 | 49 | -0.0157 |
| guanosine                | 955831  | 324 | 213307 | 3:15157.0 13                              | C00387 | 6802    | 19 / 39 | 49 | 0.0140  |
| guanine                  | 744267  | 352 | 352795 | 32.0 189:151                              | C00242 | 764     | 19 / 39 | 49 | 0.0525  |
| fructose 1 phosphate     | 800708  | 387 | 284388 | 5.0 153:2125.                             | C01094 | 65246   | 19 / 39 | 49 | 0.0114  |
| erythritol               | 471274  | 205 | 200514 | 9:27.0 140:1                              | C00503 | 222285  | 19 / 39 | 49 | -0.0226 |
| conduritol beta epoxide  | 704838  | 318 | 367907 | 0 145:6432.0 147:20324.0 148:2828.0 149:  |        |         | 19 / 39 | 49 | -0.0172 |
| aspartic acid            | 480295  | 232 | 497687 | 0 1047.0 190:180.0 196:1.0 202:1497.0 20: |        |         | 19 / 39 | 49 | 0.0198  |

|                          |         |     |        |                                            |        |          |         |    |         |
|--------------------------|---------|-----|--------|--------------------------------------------|--------|----------|---------|----|---------|
| ascorbic acid            | 672508  | 332 | 211436 | 0 162:4.0 163                              | C00072 | 5785     | 19 / 39 | 49 | -0.0204 |
| alpha ketoglutaric acid  | 507734  | 198 | 200425 | 0 151:3.0 153                              | C00026 | 51       | 19 / 39 | 49 | -0.0303 |
| 4-hydroxyproline         | 481319  | 140 | 227980 | 0 214:231.0 :                              | C01015 | 825      | 19 / 39 | 49 | -0.0131 |
| urea                     | 331223  | 171 | 199770 | 1895.0 135:4:                              | C00086 | 1176     | 18 / 39 | 46 | 0.0027  |
| tryptophan               | 779834  | 202 | 199775 | 2.0 158:69.0 1                             | C00078 | 6305     | 18 / 39 | 46 | 0.0175  |
| sucrose                  | 916949  | 271 | 203674 | 0 133:29245.                               | C00089 | 5988     | 18 / 39 | 46 | 0.0315  |
| stigmasterol             | 1111133 | 129 | 321615 | :2702.0 140:2                              | C05442 | 5280794  | 18 / 39 | 46 | 0.0069  |
| shikimic acid            | 610984  | 204 | 199162 | 250.0 135:25                               | C00493 | 8742     | 18 / 39 | 46 | -0.0297 |
| pantothenic acid         | 691214  | 103 | 205158 | 148:122.0 14                               | C00864 | 6613     | 18 / 39 | 46 | 0.0177  |
| oxalic acid              | 259625  | 147 | 207563 | 0 166:4.0 168                              | C00209 | 971      | 18 / 39 | 46 | 0.0225  |
| ethanol phosphate        | 316988  | 211 | 404433 | 183:61.0 185:200.0 186:3.0 195:86.0 196:1  |        |          | 18 / 39 | 46 | -0.0109 |
| dihydroabietic acid      | 849610  | 239 | 226283 | 50.0 185:101.0 186:54.0 188:               |        | 227277   | 18 / 39 | 46 | -0.0238 |
| 2-monoolein              | 942197  | 129 | 203261 | 139:10.0 140:                              | C02112 | 5319879  | 18 / 39 | 46 | 0.0089  |
| serine                   | 396734  | 204 | 486007 | 1:152.0 151:34.0 155:97.0 156:115.0 157:2. |        |          | 17 / 39 | 44 | 0.0015  |
| octadecanol              | 754493  | 327 | 410809 | 0 167:349.0 1                              | D01924 | 8221     | 17 / 39 | 44 | 0.0085  |
| beta-alanine             | 431950  | 248 | 227997 | .0 156:93.0 1                              | C00099 | 239      | 17 / 39 | 44 | 0.0042  |
| adipic acid              | 475399  | 111 | 218815 | 04.0 186:88.0                              | C06104 | 196      | 17 / 39 | 44 | 0.0437  |
| 2-aminoadipic acid       | 572700  | 260 | 213131 | 0.0 146:78.0 1                             | C00956 | 469      | 17 / 39 | 44 | -0.0202 |
| 1-hexadecanol            | 679722  | 299 | 367920 | 1 201:78.0 204:                            | C00823 | 2682     | 17 / 39 | 44 | 0.0298  |
| threitol                 | 467314  | 217 | 202661 | .0 175:76.0 177:24.0 180:1.                |        | 169019   | 16 / 39 | 41 | 0.0297  |
| phenylethylamine         | 510041  | 174 | 438065 | 5.0 318:20.0 321:12.0 329:77.0 330:19.0 3: |        |          | 16 / 39 | 41 | 0.0029  |
| oleic acid               | 778858  | 339 | 199610 | 1:57.0 140:27.                             | C00712 | 445639   | 16 / 39 | 41 | 0.0427  |
| mannose                  | 645005  | 205 | 215860 | 191:46.0 193:                              | C00159 | 18950    | 16 / 39 | 41 | -0.0003 |
| kynurenine               | 769271  | 218 | 226885 | 537.0 151:11                               | C00328 | 161166   | 16 / 39 | 41 | 0.0233  |
| isoheptadecanoic acid    | 750645  | 117 | 200398 | 0.0 166:1.0 167:14.0 168:6.0               |        | 10465    | 16 / 39 | 41 | 0.0479  |
| inositol-4-monophosphate | 845491  | 318 | 200698 | 3.0 150:42.0 :                             | C03546 | 440043   | 16 / 39 | 41 | 0.0709  |
| icosenoic acid           | 848697  | 129 | 214000 | 1:26.0 155:4.0                             | C16526 | 5282767  | 16 / 39 | 41 | 0.0201  |
| glucose-6-phosphate      | 806065  | 387 | 199915 | 50.0 150:20.0                              | C00092 | 5958     | 16 / 39 | 41 | 0.0288  |
| cholesterol              | 1075918 | 129 | 372926 | 1145.0 133:11                              | C00187 | 5997     | 16 / 39 | 41 | -0.0150 |
| 2-monopalmitin           | 889972  | 218 | 233239 | 3.0 142:193.0 144:727.0 14                 |        | 123409   | 16 / 39 | 41 | 0.0114  |
| 2-hydroxybutanoic acid   | 257844  | 131 | 425498 | 4:673.0 185:                               | C05984 | 94318    | 16 / 39 | 41 | 0.0169  |
| glycolic acid            | 229810  | 177 | 216047 | 201:24.0 204:                              | C00160 | 757      | 15 / 39 | 38 | -0.0145 |
| galactose-6-phosphate    | 817783  | 387 | 199932 | .0 145:17.0 1                              | C00446 | 99058    | 15 / 39 | 38 | 0.0218  |
| cystine                  | 804143  | 218 | 223490 | 264.0 209:19.                              | C00491 | 67678    | 15 / 39 | 38 | 0.0239  |
| acetophenone             | 238719  | 105 | 211899 | 0 316:1.0 319                              | C07113 | 7410     | 15 / 39 | 38 | 0.0294  |
| 1-monostearin            | 959625  | 399 | 202835 | .0 136:127.0 :                             | D01947 | 24699    | 15 / 39 | 38 | 0.0852  |
| 1,5-anhydroglucitol      | 634023  | 217 | 386126 | 1.0 156:180.0                              | C07326 | 64960    | 15 / 39 | 38 | 0.0215  |
| stearic acid             | 787358  | 117 | 199195 | 2.0 141:52.0 :                             | C01530 | 5281     | 14 / 39 | 36 | 0.0321  |
| palmitic acid            | 711066  | 313 | 227993 | :55.0 158:1.0                              | C00249 | 985      | 14 / 39 | 36 | 0.0395  |
| mannitol                 | 665530  | 103 | 241287 | 1315.0 130:87101.0 131:72352.0 132:4942    |        |          | 14 / 39 | 36 | 0.0174  |
| hydroxycarbamate         | 325357  | 278 | 203241 | 1375.0 148:3406.0 149:167:                 |        | 16639161 | 14 / 39 | 36 | 0.0464  |
| fructose-6-phosphate     | 804605  | 315 | 201024 | 5.0 144:17.0                               | C00085 | 69507    | 14 / 39 | 36 | 0.0243  |
| erythronic acid lactone  | 407645  | 147 | 200446 | 2149.0 149:1150.0 150:126.                 |        | 5325915  | 14 / 39 | 36 | 0.0593  |
| dodecanol                | 508488  | 243 | 218955 | :3.0 149:51.0                              | C02277 | 8193     | 14 / 39 | 36 | 0.0806  |
| dodecane                 | 247379  | 98  | 221584 | 121:117.0 12                               | C08374 | 8182     | 14 / 39 | 36 | 0.0256  |
| cysteine-glycine         | 715639  | 220 | 227594 | 221:840.0 22                               | C01419 | 439498   | 14 / 39 | 36 | 0.0425  |
| azelaic acid             | 610175  | 317 | 225382 | 15095.0 132:                               | C08261 | 2266     | 14 / 39 | 36 | 0.0250  |
| allo-inositol            | 675911  | 318 | 203304 | 55:3.0 156:12.0 157:71.0 15                |        | 53714838 | 14 / 39 | 36 | 0.0385  |
| 3-phosphoglycerate       | 609618  | 299 | 234616 | :200.0 156:31                              | C00197 | 724      | 14 / 39 | 36 | 0.0663  |
| 2-phenylpropanol         | 319992  | 193 | 212666 | :54.0 139:72.0 142:71.0 14:                |        | 447661   | 14 / 39 | 36 | 0.0608  |
| 2-ketoisocaproic acid    | 310629  | 200 | 213388 | 30:4.0 182:42                              | C00233 | 70       | 14 / 39 | 36 | 0.0775  |
| pelargonic acid          | 399163  | 117 | 201810 | :39.0 172:25.                              | C01601 | 8158     | 13 / 39 | 33 | 0.0575  |
| myristic acid            | 634543  | 285 | 199929 | 143:1314.0 14                              | C06424 | 11005    | 13 / 39 | 33 | 0.0613  |
| lauric acid              | 548310  | 117 | 374008 | 668.0 147:16                               | C02679 | 3893     | 13 / 39 | 33 | 0.0428  |
| capric acid              | 451122  | 117 | 213517 | 2.0 242:1.0 2                              | C01571 | 2969     | 13 / 39 | 33 | 0.0766  |
| 5-methoxytryptamine      | 863982  | 174 | 200896 | 5:4171.0 176                               | C05659 | 1833     | 13 / 39 | 33 | 0.0023  |
| quinic acid              | 630216  | 255 | 227967 | .44:194.0 145                              | C00296 | 6508     | 12 / 39 | 31 | 0.0015  |
| pentadecanoic acid       | 674704  | 117 | 203296 | 3:26.0 140:30                              | C16537 | 13849    | 12 / 39 | 31 | 0.0684  |
| gluconic acid            | 693140  | 333 | 211990 | 5913.0 148:2!                              | C00257 | 10690    | 12 / 39 | 31 | 0.0735  |

|                        |        |     |        |                                           |        |        |         |    |         |
|------------------------|--------|-----|--------|-------------------------------------------|--------|--------|---------|----|---------|
| 3-aminoisobutyric acid | 452732 | 174 | 267806 | 132:16524.0 1                             | C05145 | 64956  | 12 / 39 | 31 | 0.0327  |
| uridine                | 856953 | 258 | 213127 | .0 134:1761.0                             | C00299 | 6029   | 11 / 39 | 28 | 0.0546  |
| methionine sulfoxide   | 637668 | 301 | 303827 | 5:441.0 206:488.0 214:4.0 217:17.0 218:30 |        |        | 11 / 39 | 28 | 0.0502  |
| hydroxylamine          | 254242 | 146 | 348772 | 5:568.0 139:4                             | C00192 | 787    | 11 / 39 | 28 | 0.0654  |
| histidine              | 663938 | 154 | 368048 | 1.0 145:572.0                             | C00135 | 6274   | 11 / 39 | 28 | 0.0741  |
| caprylic acid          | 343899 | 201 | 331346 | 170.0 188:107                             | C06423 | 379    | 11 / 39 | 28 | 0.1087  |
| benzoic acid           | 338714 | 179 | 386128 | .0 171:12118                              | C00180 | 243    | 11 / 39 | 28 | 0.0662  |
| arachidic acid         | 856203 | 117 | 201822 | 203:5.0 204:1                             | C06425 | 10467  | 11 / 39 | 28 | -0.0122 |
| allantoic acid         | 723133 | 100 | 206158 | :3.0 154:10.0                             | C00499 | 203    | 11 / 39 | 28 | 0.0738  |
| triethanolamine        | 530879 | 262 | 200764 | 0 154:1.0 155                             | C06771 | 7618   | 10 / 39 | 26 | 0.0765  |
| tagatose               | 630162 | 307 | 325185 | 19.0 141:139                              | D09007 | 92092  | 10 / 39 | 26 | 0.0700  |
| octadecane-1,12-diol   | 821168 | 187 | 321385 | 41:38.0 248:10.0 255:24.0 2               |        | 95421  | 10 / 39 | 26 | 0.0346  |
| citrulline             | 622308 | 157 | 339415 | 35:69.0 186:5                             | C00327 | 9750   | 9 / 39  | 23 | 0.0842  |
| citric acid            | 616681 | 273 | 232087 | 138:697.0 13                              | C00158 | 311    | 9 / 39  | 23 | 0.0419  |
| spermidine             | 792258 | 144 | 200990 | 153.0 173:11.                             | C00315 | 1102   | 8 / 39  | 21 | 0.0907  |
| ornithine              | 619715 | 142 | 268366 | 242.0 132:22                              | C00077 | 6262   | 8 / 39  | 21 | 0.1102  |
| dihydrosphingosine     | 873228 | 204 | 445065 | 5.0 161:59.0 :                            | C00836 | 91486  | 8 / 39  | 21 | 0.0671  |
| biuret                 | 571672 | 171 | 228536 | 183.0 169:105                             | C06555 | 7913   | 7 / 39  | 18 | 0.0754  |
| lysine                 | 662967 | 156 | 237589 | 32:2538.0 184                             | C00047 | 5962   | 5 / 39  | 13 | 0.0901  |
| glucose                | 650726 | 160 | 219881 | 13:36602.0 13                             | C00031 | 107526 | 5 / 39  | 13 | 0.1004  |



loadings for latent variable 1

loadings for latent variable 1

| BinBase ID | Retention Index | Quantified Ion | Mass spectra (m/z : intensity) | proportion increased in tumors | % increased in tumors | O-PLS-DA model loadings for latent variable 1 |
|------------|-----------------|----------------|--------------------------------|--------------------------------|-----------------------|-----------------------------------------------|
| 288808     | 265523          | 232            | 7.0 184:5735.0                 | 34 / 39                        | 87                    | -0.1106                                       |
| 228983     | 466444          | 160            | 0 165:8.0 167                  | 32 / 39                        | 82                    | -0.0726                                       |
| 241389     | 643179          | 204            | 37.0 199:9.0 2                 | 32 / 39                        | 82                    | -0.0574                                       |
| 622135     | 455205          | 171            | 43.0 165:3.0 1                 | 32 / 39                        | 82                    | -0.1089                                       |
| 227703     | 508685          | 299            | 109.0 213:50.                  | 31 / 39                        | 79                    | -0.0854                                       |
| 242128     | 412533          | 116            | 46:2482.0 14                   | 31 / 39                        | 79                    | -0.0713                                       |
| 369621     | 413958          | 88             | 48:209.0 149:                  | 31 / 39                        | 79                    | -0.0595                                       |
| 385065     | 1147670         | 204            | 786.0 190:104                  | 30 / 39                        | 77                    | -0.0475                                       |
| 650627     | 530871          | 188            | 106.0 188:24                   | 30 / 39                        | 77                    | -0.1038                                       |
| 203221     | 508975          | 268            | 510.0 136:75                   | 29 / 39                        | 74                    | -0.0765                                       |
| 229203     | 840930          | 94             | 54.0 156:71.0                  | 29 / 39                        | 74                    | -0.0485                                       |
| 293848     | 895697          | 290            | 218:179.0 21                   | 29 / 39                        | 74                    | -0.0661                                       |
| 369589     | 914459          | 246            | 5.0 137:106.0                  | 29 / 39                        | 74                    | -0.0483                                       |
| 640528     | 585690          | 217            | 149:7540.0 1                   | 29 / 39                        | 74                    | -0.0921                                       |
| 200906     | 565964          | 275            | 4:1666.0 145:                  | 28 / 39                        | 72                    | -0.0593                                       |
| 218839     | 577533          | 186            | 2384.0 149:1                   | 28 / 39                        | 72                    | -0.0541                                       |
| 222199     | 967501          | 114            | 1:392.0 152:4                  | 28 / 39                        | 72                    | 0.0122                                        |
| 208557     | 294136          | 172            | 141:105.0 14                   | 27 / 39                        | 69                    | -0.0789                                       |
| 213968     | 452663          | 252            | 6.0 167:27.0                   | 27 / 39                        | 69                    | -0.0962                                       |
| 227675     | 630481          | 292            | 678.0 220:21                   | 27 / 39                        | 69                    | -0.0445                                       |
| 349922     | 521251          | 231            | 166:16.0 1                     | 27 / 39                        | 69                    | -0.0532                                       |
| 227832     | 627964          | 226            | 151:24.0 152                   | 26 / 39                        | 67                    | -0.0847                                       |
| 236890     | 628019          | 217            | 151:20.0 15:                   | 26 / 39                        | 67                    | -0.0902                                       |
| 362056     | 841774          | 129            | 156:100.0 15:                  | 26 / 39                        | 67                    | -0.0455                                       |
| 626305     | 762013          | 192            | 55:10.0 169:5                  | 26 / 39                        | 67                    | -0.0541                                       |
| 199553     | 594210          | 292            | 140:67.0 14                    | 25 / 39                        | 64                    | -0.0595                                       |
| 211972     | 473115          | 98             | 158:129.0                      | 25 / 39                        | 64                    | -0.0454                                       |
| 213974     | 991296          | 169            | 192:3.0 196:6                  | 25 / 39                        | 64                    | -0.0925                                       |
| 221505     | 752306          | 369            | 12.0 161:11.0                  | 25 / 39                        | 64                    | -0.0584                                       |
| 289052     | 515010          | 186            | 233:13.0 2                     | 25 / 39                        | 64                    | -0.0372                                       |
| 362144     | 674153          | 174            | 178:3.0 18:                    | 25 / 39                        | 64                    | -0.0329                                       |
| 414988     | 616859          | 86             | 20:51.0 122:1                  | 25 / 39                        | 64                    | 0.0114                                        |
| 200791     | 800737          | 217            | 8.0 161:103.                   | 24 / 39                        | 62                    | -0.0301                                       |
| 310871     | 557438          | 252            | 168:3.0 171:1                  | 24 / 39                        | 62                    | -0.0076                                       |
| 343526     | 477455          | 188            | 5:521.0 147:2                  | 24 / 39                        | 62                    | -0.0431                                       |
| 357054     | 302713          | 307            | 139:47.0 14                    | 24 / 39                        | 62                    | -0.0695                                       |
| 367991     | 525157          | 188            | 3.0 144:1065                   | 24 / 39                        | 62                    | -0.0623                                       |
| 428311     | 471511          | 85             | 146:26.0 14                    | 24 / 39                        | 62                    | -0.0203                                       |
| 437302     | 565008          | 275            | 3:1.0 144:591                  | 24 / 39                        | 62                    | -0.0483                                       |
| 203311     | 1190822         | 204            | 55:46.0 156:8                  | 23 / 39                        | 59                    | -0.0615                                       |
| 213697     | 456893          | 232            | 95.0 158:274                   | 23 / 39                        | 59                    | -0.0455                                       |
| 221606     | 580123          | 159            | 185:4.0 18                     | 23 / 39                        | 59                    | -0.0443                                       |
| 227767     | 523660          | 211            | 153:115.0 15                   | 23 / 39                        | 59                    | -0.0019                                       |
| 238267     | 1122259         | 361            | 238267                         | 23 / 39                        | 59                    | -0.0337                                       |

|        |         |     |                |         |    |         |
|--------|---------|-----|----------------|---------|----|---------|
| 300148 | 559473  | 99  | 4:134.0 125:4  | 23 / 39 | 59 | -0.0397 |
| 476001 | 822491  | 111 | 012.0 156:158  | 23 / 39 | 59 | -0.0132 |
| 288019 | 911896  | 259 | .0 170:296.0   | 22 / 39 | 56 | -0.0563 |
| 418858 | 321024  | 86  | ) 140:671.0 1  | 22 / 39 | 56 | -0.0364 |
| 200914 | 550216  | 275 | 2:1198.0 143   | 21 / 39 | 54 | -0.0218 |
| 200942 | 783186  | 100 | 151:16.0 152   | 21 / 39 | 54 | -0.0509 |
| 213253 | 280269  | 86  | :65.0 127:33   | 21 / 39 | 54 | -0.0419 |
| 227352 | 927021  | 132 | '0.0 153:325.0 | 21 / 39 | 54 | 0.0191  |
| 236652 | 567535  | 99  | 50.0 156:298   | 21 / 39 | 54 | -0.0103 |
| 238321 | 937421  | 361 | 1:128.0 193:1  | 21 / 39 | 54 | 0.0098  |
| 291025 | 588283  | 174 | 182:2.0 193:1  | 21 / 39 | 54 | -0.0392 |
| 362008 | 528050  | 217 | .262.0 136:19  | 21 / 39 | 54 | -0.0144 |
| 498712 | 297024  | 113 | 0:101.0 152:8  | 21 / 39 | 54 | 0.0003  |
| 537746 | 409445  | 219 | 36.0 161:167   | 21 / 39 | 54 | -0.0064 |
| 208664 | 505151  | 140 | 0 142:1.0 143  | 20 / 39 | 51 | -0.0358 |
| 211919 | 401728  | 194 | .0 200:4.0 20  | 20 / 39 | 51 | 0.0394  |
| 219484 | 406246  | 227 | 6:187.0 148:5  | 20 / 39 | 51 | -0.0268 |
| 268050 | 818135  | 174 | .0 169:94.0 1  | 20 / 39 | 51 | 0.0003  |
| 309540 | 741287  | 117 | 0 157:208.0 1  | 20 / 39 | 51 | 0.0067  |
| 321685 | 843904  | 217 | :408.0 146:6   | 20 / 39 | 51 | -0.0024 |
| 362021 | 718276  | 174 | 1.0 187:25.0   | 20 / 39 | 51 | -0.0210 |
| 438099 | 478631  | 159 | .0 140:191.0   | 20 / 39 | 51 | 0.0126  |
| 605658 | 291772  | 187 | 089.0 116:86   | 20 / 39 | 51 | 0.0118  |
| 614531 | 533559  | 102 | 0 159:9.0 168  | 20 / 39 | 51 | -0.0008 |
| 629270 | 844751  | 85  | 8:33.0 139:25  | 20 / 39 | 51 | 0.0372  |
| 673048 | 588927  | 184 | 4.0 152:163.0  | 20 / 39 | 51 | 0.0170  |
| 696799 | 312044  | 228 | 5:203.0 156:2  | 20 / 39 | 51 | 0.0086  |
| 704472 | 586975  | 105 | ) 195:507.0 1  | 20 / 39 | 51 | -0.0179 |
| 199942 | 431285  | 104 | 7.0 174:21.0   | 19 / 39 | 49 | -0.0221 |
| 200961 | 937853  | 204 | 2:3.0 163:3.0  | 19 / 39 | 49 | 0.0012  |
| 211467 | 832207  | 98  | 165:13.0 166   | 19 / 39 | 49 | -0.0165 |
| 218821 | 726446  | 174 | 3.0 142:54.0 1 | 19 / 39 | 49 | -0.0056 |
| 222099 | 590692  | 197 | 1.0 167:257.0  | 19 / 39 | 49 | -0.0046 |
| 223521 | 1166398 | 283 | .0 267:119.0   | 19 / 39 | 49 | 0.0141  |
| 226272 | 563299  | 294 | 72:36.0 174:3  | 19 / 39 | 49 | 0.0038  |
| 228872 | 609571  | 140 | 1.0 204:128.0  | 19 / 39 | 49 | 0.0281  |
| 232095 | 981412  | 352 | 0 176:295.0 1  | 19 / 39 | 49 | 0.0173  |
| 240432 | 1100168 | 295 | 268.0 250:136  | 19 / 39 | 49 | 0.0142  |
| 241065 | 837646  | 116 | 2:39.0 243:59  | 19 / 39 | 49 | -0.0122 |
| 268312 | 438220  | 114 | 5:137.0 153:5  | 19 / 39 | 49 | -0.0033 |
| 269268 | 708688  | 174 | 0 171:67.0 17  | 19 / 39 | 49 | 0.0205  |
| 270547 | 1198470 | 220 | 79:383.0 181   | 19 / 39 | 49 | 0.0102  |
| 274206 | 335001  | 249 | 7:407.0 188:7  | 19 / 39 | 49 | 0.0195  |
| 281910 | 362277  | 140 | 58.0 171:173   | 19 / 39 | 49 | 0.0153  |
| 289049 | 744413  | 352 | 3.0 158:795.0  | 19 / 39 | 49 | 0.0527  |
| 309631 | 232910  | 130 | 31:5024.0 132  | 19 / 39 | 49 | -0.0072 |
| 356938 | 895137  | 247 | 60:91.0 161:5  | 19 / 39 | 49 | -0.0067 |
| 362113 | 718240  | 174 | 46.0 220:54.0  | 19 / 39 | 49 | -0.0306 |
| 445906 | 290888  | 145 | 11.0 115:969   | 19 / 39 | 49 | -0.0135 |
| 537763 | 527270  | 142 | 30.0 165:26.0  | 19 / 39 | 49 | -0.0169 |
| 566628 | 730536  | 217 | 42.0 158:344   | 19 / 39 | 49 | -0.0197 |
| 617556 | 294282  | 187 | 2546.0 148:6   | 19 / 39 | 49 | 0.0373  |
| 693690 | 321918  | 86  | ) 249:18.0 27  | 19 / 39 | 49 | 0.0355  |
| 701048 | 840947  | 159 | 238:13.0 242   | 19 / 39 | 49 | -0.0112 |
| 199213 | 589860  | 217 | .0 180:2.0 18  | 18 / 39 | 46 | 0.0154  |
| 199239 | 773115  | 211 | .0 156:102.0   | 18 / 39 | 46 | -0.0012 |
| 199786 | 637184  | 174 | .0 169:32.0 1  | 18 / 39 | 46 | 0.0257  |
| 200484 | 800844  | 163 | 2.0 183:2.0 1  | 18 / 39 | 46 | 0.0302  |
| 203295 | 899587  | 94  | 0.0 138:40.0   | 18 / 39 | 46 | 0.0005  |

|        |         |     |                |         |    |         |
|--------|---------|-----|----------------|---------|----|---------|
| 213386 | 565582  | 241 | 0.0 225:10.0   | 18 / 39 | 46 | -0.0143 |
| 222049 | 701919  | 117 | .32:84.0 133:  | 18 / 39 | 46 | -0.0205 |
| 226851 | 788409  | 373 | 39:67.0 140:2  | 18 / 39 | 46 | 0.0667  |
| 231850 | 878626  | 122 | 141:280.0 14   | 18 / 39 | 46 | 0.0390  |
| 232869 | 631360  | 245 | 160.0 146:11   | 18 / 39 | 46 | -0.0044 |
| 269269 | 692363  | 204 | 00:59.0 201:   | 18 / 39 | 46 | 0.0213  |
| 274743 | 445506  | 109 | 0 211:185.0    | 18 / 39 | 46 | 0.0058  |
| 281951 | 246515  | 187 | .0 134:3278.0  | 18 / 39 | 46 | 0.0132  |
| 285341 | 240517  | 244 | 138:472.0 13   | 18 / 39 | 46 | -0.0370 |
| 295010 | 292802  | 88  | .0 199:192.0   | 18 / 39 | 46 | -0.0278 |
| 300280 | 498851  | 85  | 5.0 259:3.0 2  | 18 / 39 | 46 | 0.0040  |
| 307909 | 698816  | 218 | .0 155:139.0   | 18 / 39 | 46 | -0.0119 |
| 309730 | 525387  | 149 | 156:988.0 15   | 18 / 39 | 46 | -0.0117 |
| 322652 | 594784  | 116 | 36:1.0 191:26  | 18 / 39 | 46 | -0.0156 |
| 330990 | 1224935 | 207 | :244.0 191:5   | 18 / 39 | 46 | -0.0339 |
| 356985 | 542812  | 102 | 2:84.0 144:15  | 18 / 39 | 46 | -0.0049 |
| 474686 | 794069  | 131 | 156:5.0 157:   | 18 / 39 | 46 | -0.0096 |
| 480136 | 933911  | 204 | 1.0 151:26.0 1 | 18 / 39 | 46 | 0.0136  |
| 200421 | 324479  | 100 | :14.0 161:3.0  | 17 / 39 | 44 | 0.0015  |
| 207223 | 417541  | 142 | 1.0 152:27.0 1 | 17 / 39 | 44 | -0.0153 |
| 216860 | 600185  | 292 | .0 207:82.0 2  | 17 / 39 | 44 | -0.0048 |
| 222050 | 606068  | 223 | 0 141:384.0 1  | 17 / 39 | 44 | -0.0181 |
| 223191 | 510626  | 185 | 516.0 156:2.0  | 17 / 39 | 44 | 0.0000  |
| 223597 | 1204498 | 297 | 95:12.0 296:2  | 17 / 39 | 44 | 0.0194  |
| 232722 | 765061  | 424 | 4:25.0 166:24  | 17 / 39 | 44 | 0.0544  |
| 241881 | 1181077 | 295 | .0 235:71.0 2  | 17 / 39 | 44 | -0.0365 |
| 270439 | 637911  | 260 | 0 174:604.0 1  | 17 / 39 | 44 | 0.0238  |
| 273745 | 317543  | 211 | .84:621.0 185  | 17 / 39 | 44 | -0.0089 |
| 293007 | 536494  | 200 | 3.0 162:23.0 1 | 17 / 39 | 44 | 0.0123  |
| 300133 | 577437  | 85  | :56.0 231:25.  | 17 / 39 | 44 | -0.0068 |
| 303839 | 916380  | 204 | 0 193:8.0 194  | 17 / 39 | 44 | 0.0208  |
| 452091 | 781399  | 101 | :2051.0 146:   | 17 / 39 | 44 | 0.0392  |
| 455340 | 1030001 | 299 | .0 181:389.0   | 17 / 39 | 44 | 0.0419  |
| 475619 | 243434  | 137 | 121:58.0 127:  | 17 / 39 | 44 | -0.0124 |
| 483487 | 235984  | 110 | 7.0 224:7.0 22 | 17 / 39 | 44 | -0.0075 |
| 597213 | 634167  | 129 | 1145:621.0 14  | 17 / 39 | 44 | 0.0397  |
| 621949 | 690712  | 174 | 156:276.0 157  | 17 / 39 | 44 | -0.0151 |
| 199609 | 1246841 | 129 | 10:16.0 141:3  | 16 / 39 | 41 | 0.0024  |
| 200411 | 595016  | 116 | 146:36.0 147:  | 16 / 39 | 41 | -0.0063 |
| 201042 | 298036  | 132 | 1.0 211:1.0 2  | 16 / 39 | 41 | -0.0177 |
| 201862 | 1134655 | 441 | .39:75.0 140:  | 16 / 39 | 41 | 0.0411  |
| 204425 | 448206  | 350 | 150:194.0 15   | 16 / 39 | 41 | 0.0344  |
| 208201 | 422868  | 85  | 4:5.0 155:4.0  | 16 / 39 | 41 | -0.0204 |
| 212022 | 421363  | 234 | 6:10.0 177:8:  | 16 / 39 | 41 | -0.0083 |
| 216428 | 505415  | 223 | .0 164:1.0 16  | 16 / 39 | 41 | -0.0180 |
| 218512 | 437089  | 156 | :481.0 142:90  | 16 / 39 | 41 | -0.0254 |
| 223973 | 1028825 | 243 | 2:15.0 193:3   | 16 / 39 | 41 | 0.0592  |
| 227017 | 801098  | 98  | .0 157:453.0   | 16 / 39 | 41 | 0.0702  |
| 228885 | 250227  | 85  | 8.0 142:990.0  | 16 / 39 | 41 | 0.0596  |
| 234717 | 628281  | 214 | 228:6.0 236    | 16 / 39 | 41 | 0.0097  |
| 242417 | 374883  | 283 | 9.0 161:291.0  | 16 / 39 | 41 | 0.0179  |
| 267647 | 959212  | 204 | 143:7724.0 14  | 16 / 39 | 41 | 0.0062  |
| 272365 | 240766  | 244 | 177.0 168:34.  | 16 / 39 | 41 | -0.0456 |
| 273773 | 240889  | 137 | 53479.0 136:8  | 16 / 39 | 41 | -0.0196 |
| 281926 | 266383  | 227 | 3:66.0 167:5:  | 16 / 39 | 41 | -0.0168 |
| 300139 | 457148  | 85  | 0 169:1159.0   | 16 / 39 | 41 | 0.0185  |
| 301584 | 247575  | 184 | 48:2198.0 15   | 16 / 39 | 41 | 0.0270  |
| 310249 | 533908  | 154 | 70:286.0 184   | 16 / 39 | 41 | -0.0371 |
| 312592 | 844853  | 331 | 9:1489.0 170:  | 16 / 39 | 41 | 0.0218  |



|        |         |     |                |         |    |         |
|--------|---------|-----|----------------|---------|----|---------|
| 330991 | 1240953 | 208 | 03:76.0 205:6  | 16 / 39 | 41 | 0.0257  |
| 362112 | 379612  | 159 | 1:369.0 172:9  | 16 / 39 | 41 | 0.0414  |
| 367932 | 380080  | 170 | 3.0 160:680.0  | 16 / 39 | 41 | 0.0167  |
| 367980 | 911810  | 375 | 2.0 167:1.0 16 | 16 / 39 | 41 | 0.0420  |
| 369729 | 629749  | 202 | 517.0 202:309  | 16 / 39 | 41 | 0.0178  |
| 381876 | 291302  | 130 | 130:6052.0     | 16 / 39 | 41 | -0.0204 |
| 470303 | 433814  | 172 | 93.0 175:12.0  | 16 / 39 | 41 | 0.0503  |
| 616767 | 235306  | 128 | 11.0 201:18.0  | 16 / 39 | 41 | -0.0154 |
| 617346 | 765617  | 152 | 153:415.0 180  | 16 / 39 | 41 | 0.0171  |
| 620889 | 1081211 | 208 | 255.0 254:87   | 16 / 39 | 41 | 0.0109  |
| 696208 | 648089  | 154 | 55:16.0 284:4  | 16 / 39 | 41 | 0.0360  |
| 200850 | 493847  | 85  | 0:14.0 322:1.0 | 15 / 39 | 38 | 0.0660  |
| 204426 | 479219  | 155 | 3:81.0 175:2.  | 15 / 39 | 38 | 0.0195  |
| 211997 | 1100607 | 309 | 170:3.0 172    | 15 / 39 | 38 | 0.0658  |
| 213353 | 695971  | 293 | 3:331.0 149:4  | 15 / 39 | 38 | 0.0450  |
| 214426 | 694613  | 318 | 148:753.0 1    | 15 / 39 | 38 | 0.0062  |
| 218449 | 458393  | 254 | 168:11.0 17    | 15 / 39 | 38 | 0.0120  |
| 222093 | 573506  | 155 | 4:10.0 166:1.0 | 15 / 39 | 38 | 0.0313  |
| 222115 | 249620  | 85  | 58203.0 148:   | 15 / 39 | 38 | 0.0032  |
| 225446 | 383070  | 156 | .0 166:88.0 1  | 15 / 39 | 38 | 0.0242  |
| 231657 | 286430  | 187 | 43:4638.0 14   | 15 / 39 | 38 | 0.0812  |
| 239585 | 596598  | 85  | 183:136.0 18   | 15 / 39 | 38 | 0.0149  |
| 241271 | 615712  | 176 | .0 138:708.0   | 15 / 39 | 38 | 0.0261  |
| 267765 | 1000928 | 174 | 2.0 160:111.0  | 15 / 39 | 38 | 0.0247  |
| 269146 | 237538  | 110 | 74.0 127:270   | 15 / 39 | 38 | -0.0329 |
| 269776 | 329088  | 117 | 1:23692.0 17   | 15 / 39 | 38 | 0.0483  |
| 270086 | 339656  | 157 | 161:2.0 164:6  | 15 / 39 | 38 | 0.0536  |
| 271128 | 611642  | 312 | 5:91.0 197:11  | 15 / 39 | 38 | 0.0486  |
| 409349 | 762401  | 98  | 40:209.0 141   | 15 / 39 | 38 | -0.0053 |
| 455826 | 856197  | 187 | 161:3.0 163:2  | 15 / 39 | 38 | 0.0391  |
| 508725 | 413447  | 175 | 6:294.0 147:1  | 15 / 39 | 38 | 0.0322  |
| 615131 | 888025  | 218 | 3:136.0 139:3  | 15 / 39 | 38 | 0.0112  |
| 616647 | 627752  | 120 | 5:684.0 136:   | 15 / 39 | 38 | 0.0117  |
| 616805 | 902913  | 108 | 133:8700.0 1   | 15 / 39 | 38 | 0.0108  |
| 673413 | 309265  | 170 | 01:40.0 303:5  | 15 / 39 | 38 | 0.0150  |
| 199596 | 246426  | 85  | 70:19.0 171:7  | 14 / 39 | 36 | 0.0600  |
| 202687 | 782008  | 357 | 152:124.0 1    | 14 / 39 | 36 | 0.0169  |
| 203592 | 592345  | 85  | 0.0 126:19.0 1 | 14 / 39 | 36 | 0.0465  |
| 203761 | 1250082 | 309 | 0 220:1.0 221  | 14 / 39 | 36 | 0.0174  |
| 213296 | 299506  | 146 | .0 177:53.0 1  | 14 / 39 | 36 | 0.0433  |
| 217893 | 708324  | 223 | 7:44.0 158:3.0 | 14 / 39 | 36 | -0.0136 |
| 221574 | 354121  | 85  | 2.0 152:28.0   | 14 / 39 | 36 | 0.0551  |
| 222169 | 975088  | 144 | 359.0 159:126  | 14 / 39 | 36 | 0.0379  |
| 228587 | 601084  | 218 | 13:3922.0 144  | 14 / 39 | 36 | 0.0306  |
| 229201 | 693537  | 230 | 0.0 170:261.0  | 14 / 39 | 36 | 0.0335  |
| 241572 | 1082682 | 299 | 2.0 177:313.0  | 14 / 39 | 36 | 0.0445  |
| 242219 | 853373  | 132 | 2:2.0 235:6.0  | 14 / 39 | 36 | 0.0162  |
| 303845 | 873301  | 174 | :471.0 218:11  | 14 / 39 | 36 | 0.0323  |
| 324627 | 611572  | 312 | '2.0 139:145.0 | 14 / 39 | 36 | 0.0592  |
| 379432 | 504508  | 85  | 26401.0 150:4  | 14 / 39 | 36 | 0.0378  |
| 408490 | 968624  | 185 | 43:109.0 158:  | 14 / 39 | 36 | 0.0377  |
| 419631 | 685378  | 149 | 283:16.0 28    | 14 / 39 | 36 | 0.0422  |
| 428330 | 762332  | 85  | 38:4.0 140:13  | 14 / 39 | 36 | 0.0427  |
| 483342 | 706083  | 91  | 134:4080.0     | 14 / 39 | 36 | 0.0102  |
| 497413 | 315841  | 161 | 43:37.0 144:6  | 14 / 39 | 36 | 0.0387  |
| 704387 | 581257  | 313 | 11:2154.0 21   | 14 / 39 | 36 | 0.0125  |
| 200471 | 568970  | 97  | 7:743.0 128:   | 13 / 39 | 33 | 0.0615  |
| 202664 | 353284  | 85  | 0.0 234:1.0 24 | 13 / 39 | 33 | 0.0485  |
| 204079 | 424144  | 138 | 15:1.0 227:52  | 13 / 39 | 33 | 0.0654  |

|        |         |     |                |         |    |         |
|--------|---------|-----|----------------|---------|----|---------|
| 206556 | 424318  | 85  | 0:7.0 171:2.0  | 13 / 39 | 33 | 0.0168  |
| 225555 | 685994  | 266 | 13:20.0 216:1  | 13 / 39 | 33 | 0.0208  |
| 232017 | 571888  | 197 | 0 145:308.0 1  | 13 / 39 | 33 | -0.0097 |
| 241087 | 739222  | 353 | 9:3383.0 180   | 13 / 39 | 33 | 0.0025  |
| 270073 | 310098  | 200 | 2.0 156:279.0  | 13 / 39 | 33 | 0.0749  |
| 270999 | 412676  | 191 | 55:1403.0 15   | 13 / 39 | 33 | 0.0421  |
| 300129 | 371476  | 85  | 4.0 199:228.0  | 13 / 39 | 33 | 0.0198  |
| 300153 | 837361  | 85  | 184:25.0 188:  | 13 / 39 | 33 | 0.0071  |
| 308912 | 795917  | 174 | 3.0 157:4.0 15 | 13 / 39 | 33 | 0.0786  |
| 317187 | 809952  | 387 | 3.0 148:1030.  | 13 / 39 | 33 | 0.0320  |
| 356957 | 692437  | 229 | 13:16.0 216:4  | 13 / 39 | 33 | -0.0058 |
| 408731 | 397310  | 97  | 2.0 167:125.0  | 13 / 39 | 33 | 0.0571  |
| 508989 | 641301  | 175 | 4.0 145:307.0  | 13 / 39 | 33 | 0.0562  |
| 558744 | 283909  | 201 | 160:2177.0     | 13 / 39 | 33 | 0.0688  |
| 624232 | 380326  | 113 | 025.0 157:90   | 13 / 39 | 33 | 0.0488  |
| 650096 | 374525  | 111 | 5:66.0 206:56  | 13 / 39 | 33 | 0.0522  |
| 201887 | 1200427 | 316 | 150:30.0 151   | 12 / 39 | 31 | 0.0193  |
| 204522 | 475916  | 85  | 4.0 167:2.0 16 | 12 / 39 | 31 | 0.0401  |
| 205734 | 570304  | 102 | 29.0 151:2.0   | 12 / 39 | 31 | 0.0526  |
| 212251 | 888557  | 387 | 160:3.0 162:9  | 12 / 39 | 31 | 0.0256  |
| 213143 | 873684  | 446 | 7339.0 148:9   | 12 / 39 | 31 | 0.0748  |
| 225384 | 849622  | 338 | 137:429.0 1    | 12 / 39 | 31 | 0.0602  |
| 226845 | 795371  | 232 | 0 217:470.0 2  | 12 / 39 | 31 | 0.0854  |
| 349887 | 685244  | 204 | 9.0 158:299.0  | 12 / 39 | 31 | 0.0584  |
| 356925 | 648085  | 174 | 2268.0 176:9   | 12 / 39 | 31 | 0.0295  |
| 359447 | 905449  | 159 | 0 159:3172.0   | 12 / 39 | 31 | 0.0840  |
| 419655 | 803124  | 85  | 1:208.0 212:3  | 12 / 39 | 31 | -0.0136 |
| 607692 | 855957  | 187 | 1:9.0 163:228  | 12 / 39 | 31 | 0.0515  |
| 616800 | 867822  | 144 | 36:75.0 137:5  | 12 / 39 | 31 | 0.0252  |
| 210286 | 701682  | 217 | 35:846.0 136:  | 11 / 39 | 28 | 0.0284  |
| 211946 | 470440  | 184 | 71:6.0 172:20  | 11 / 39 | 28 | 0.0798  |
| 241063 | 991837  | 174 | 13.0 214:4.0 2 | 11 / 39 | 28 | 0.0785  |
| 348578 | 469815  | 191 | 1:11.0 163:1   | 11 / 39 | 28 | 0.0679  |
| 438057 | 808905  | 98  | 87.0 188:105   | 11 / 39 | 28 | 0.0768  |
| 626325 | 613559  | 121 | 43:139.0 190   | 11 / 39 | 28 | 0.0799  |
| 225283 | 530734  | 262 | 1:75.0 201:48  | 10 / 39 | 26 | 0.0676  |
| 233287 | 641829  | 201 | 10:442.0 141:  | 10 / 39 | 26 | 0.0504  |
| 240551 | 763602  | 174 | 4.0 244:78.0   | 10 / 39 | 26 | 0.0630  |
| 300108 | 664281  | 85  | 548.0 154:68   | 10 / 39 | 26 | 0.0911  |
| 362093 | 883789  | 204 | 3.0 180:9.0 18 | 10 / 39 | 26 | 0.0176  |
| 616706 | 949564  | 174 | 52:53.0 154:2  | 10 / 39 | 26 | 0.0248  |
| 223629 | 792540  | 255 | 156.0 207:56   | 9 / 39  | 23 | 0.0753  |
| 228143 | 673081  | 187 | 40:749.0 141:  | 9 / 39  | 23 | 0.0539  |
| 234567 | 775045  | 235 | .0 201:10.0 2  | 9 / 39  | 23 | 0.0772  |
| 238437 | 905447  | 174 | .0 249:42.0 2  | 9 / 39  | 23 | 0.0565  |
| 268506 | 301113  | 216 | 142:53.0 143   | 9 / 39  | 23 | 0.0804  |
| 288810 | 274062  | 152 | 89.0 154:161   | 9 / 39  | 23 | 0.0565  |
| 309642 | 227707  | 173 | 57.0 145:153   | 9 / 39  | 23 | 0.0700  |
| 356987 | 630673  | 102 | 8.0 119:303.   | 9 / 39  | 23 | 0.0492  |
| 474826 | 846935  | 98  | 35:617.0 136:  | 9 / 39  | 23 | 0.0968  |
| 199794 | 681176  | 361 | 138:92.0 139   | 8 / 39  | 21 | 0.0938  |
| 199806 | 701060  | 204 | 3:2.0 154:4.0  | 8 / 39  | 21 | 0.0996  |
| 227601 | 284985  | 188 | 181:1.0 184:   | 8 / 39  | 21 | 0.0908  |
| 267824 | 751322  | 174 | 59:4.0 170:64  | 8 / 39  | 21 | 0.0896  |
| 270977 | 867673  | 375 | 2.0 249:2.0 2  | 8 / 39  | 21 | 0.0662  |
| 199777 | 675254  | 217 | 0 139:93.0 14  | 7 / 39  | 18 | 0.0993  |
| 217797 | 655403  | 273 | 37.0 138:309.  | 6 / 39  | 15 | 0.0508  |
| 223121 | 859963  | 204 | 8:8.0 169:74   | 6 / 39  | 15 | 0.0352  |
| 218951 | 686095  | 187 | 46.0 145:328   | 5 / 39  | 13 | 0.0581  |
