# Supplementary material
Source: PubMed Central journal article supplement (PMC4618700)
Supplement: NIHMS728155-supplement-4.pdf [file NIHMS728155-supplement-4.pdf]

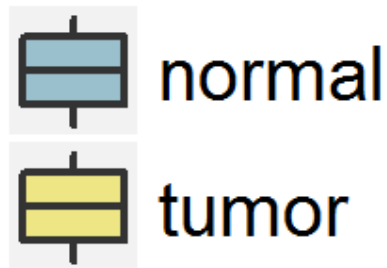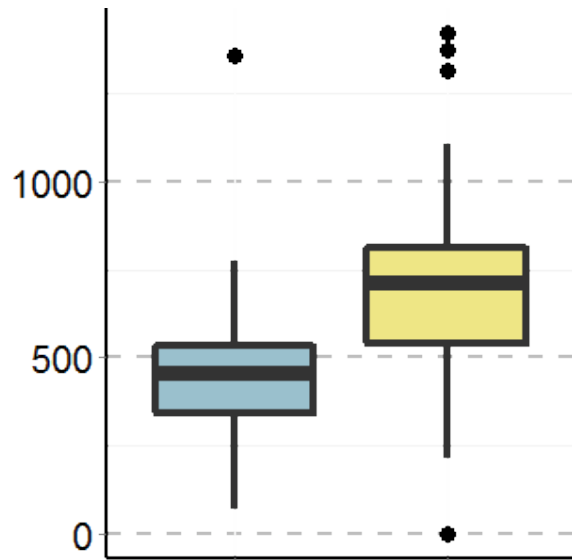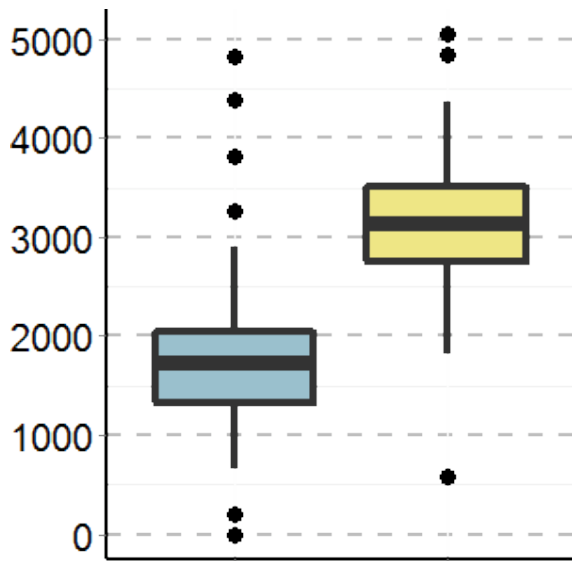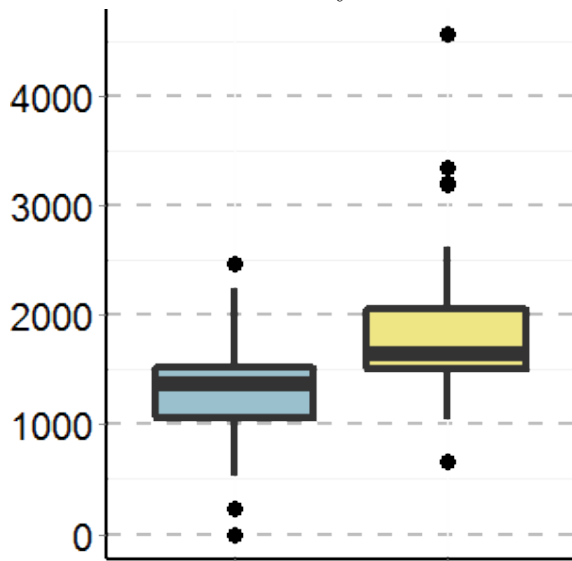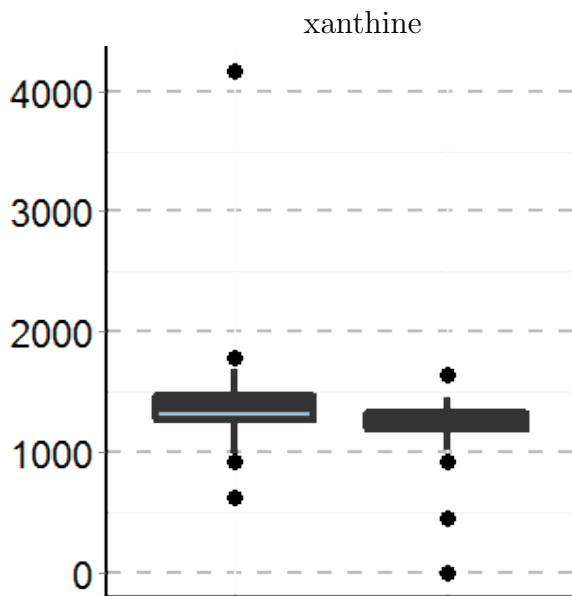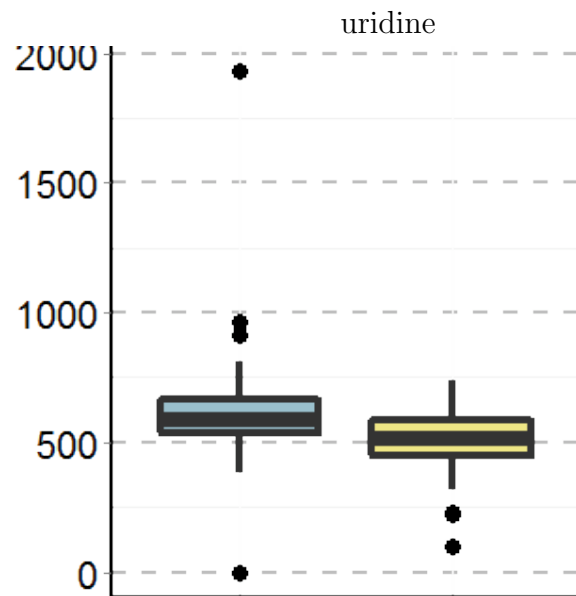

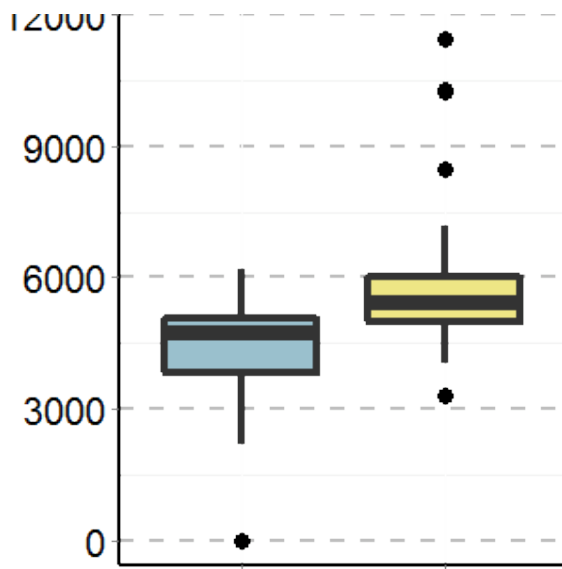

UDP-glucuronic acid

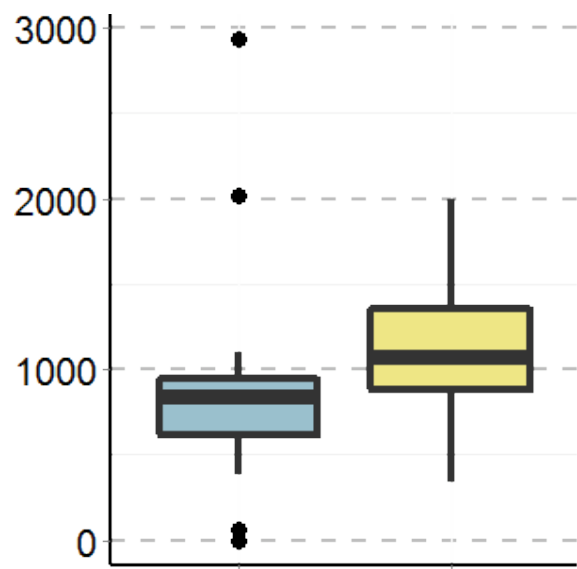

UDP GlcNAc

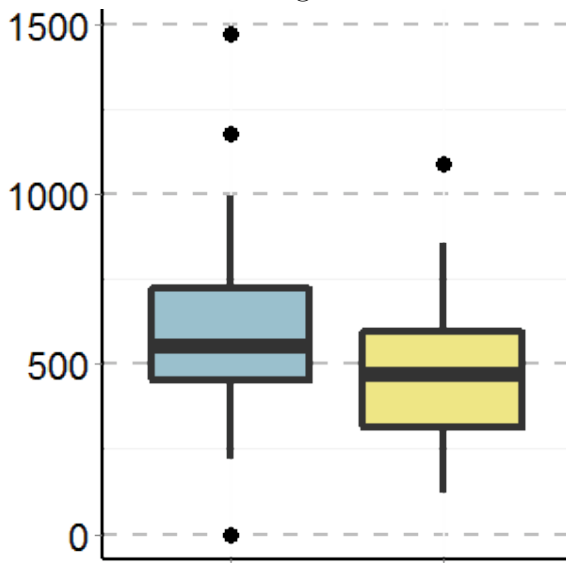

triethanolamine

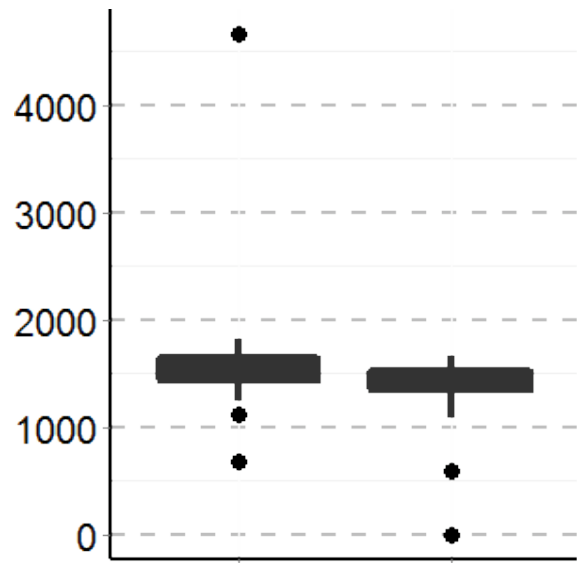

trans-4-hydroxyproline

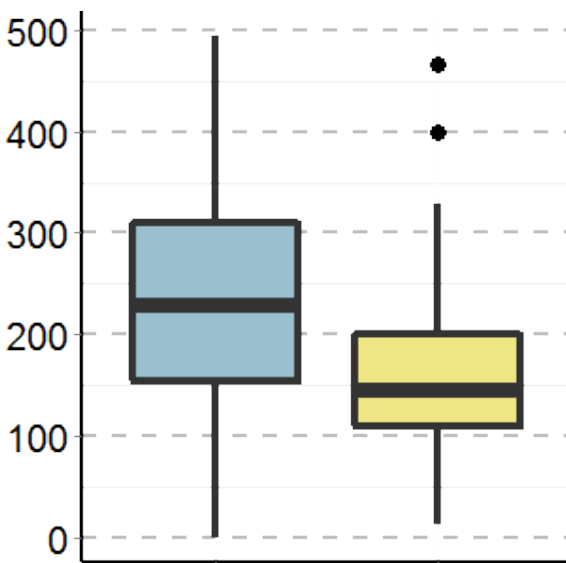

tocopherol alpha

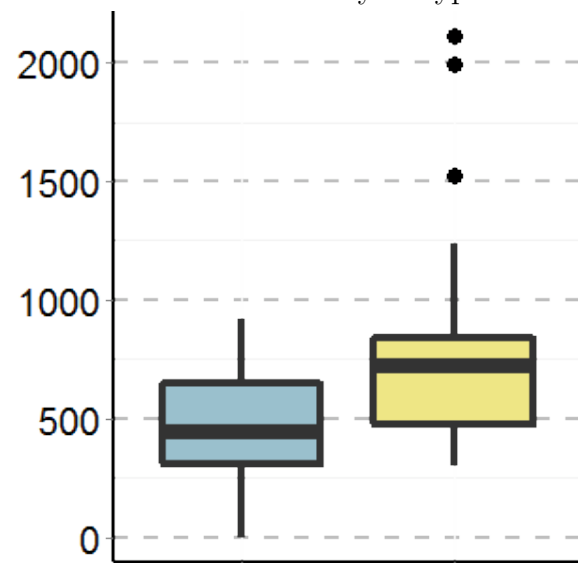

tagatose

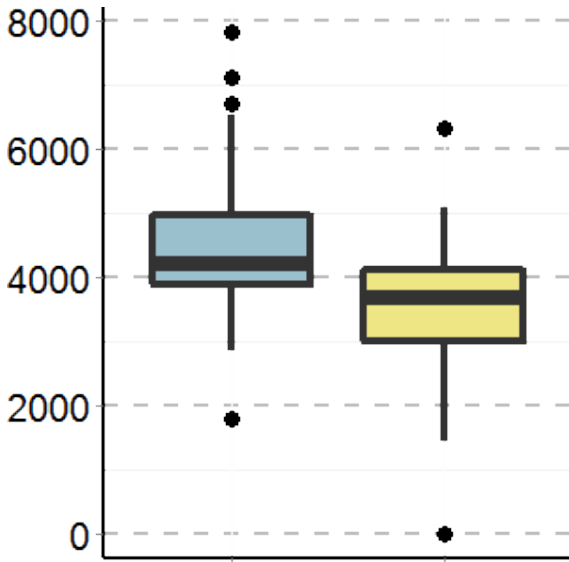

stearic acid

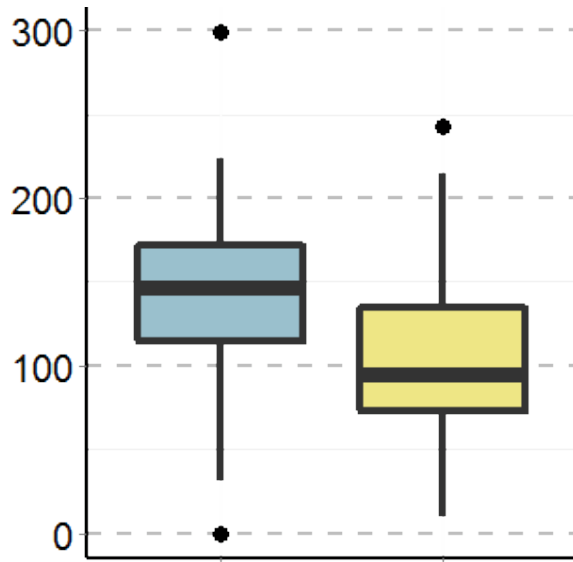

spermidine

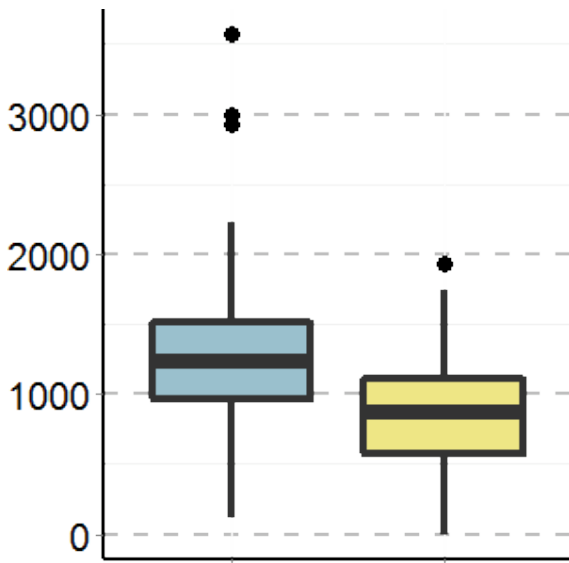

ribitol

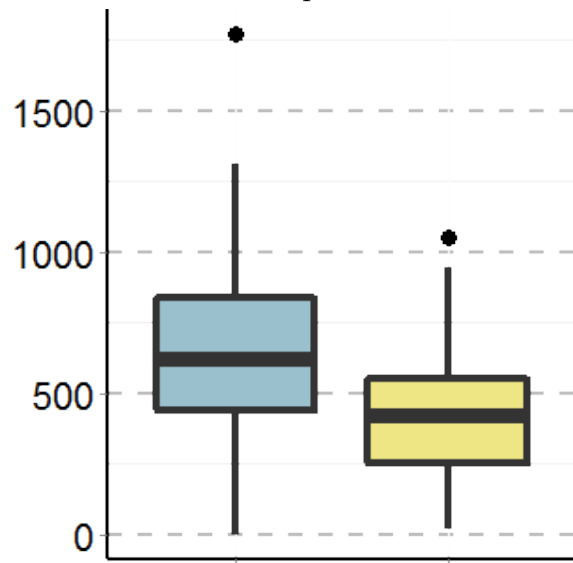

quinic acid

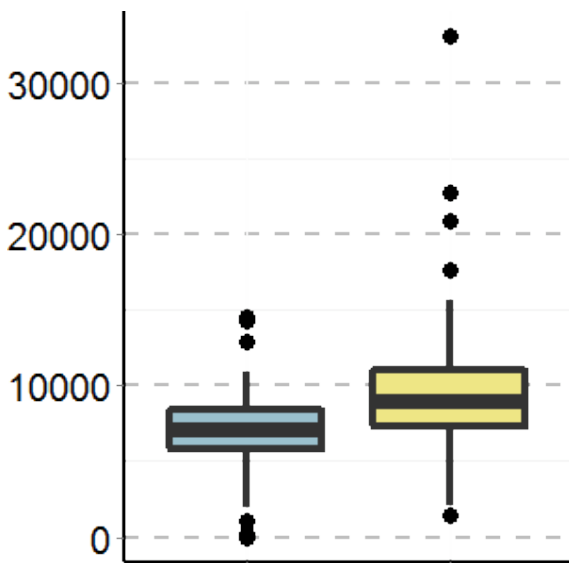

proline

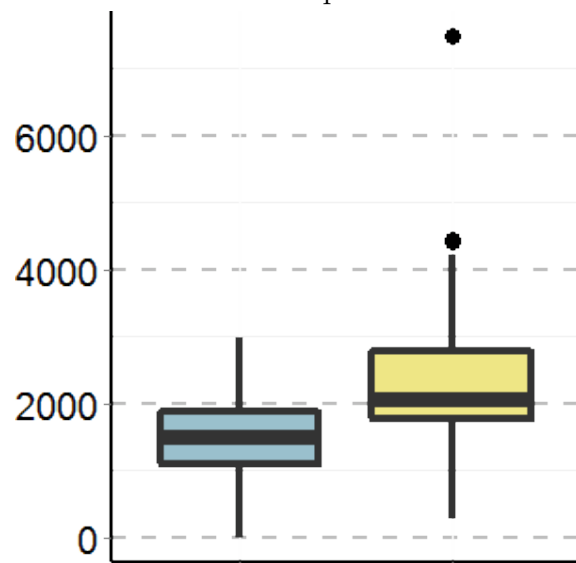

pentadecanoic acid

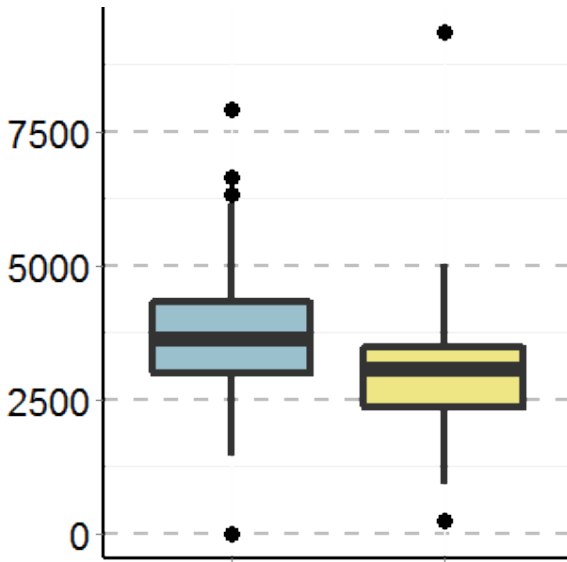

pelargonic acid

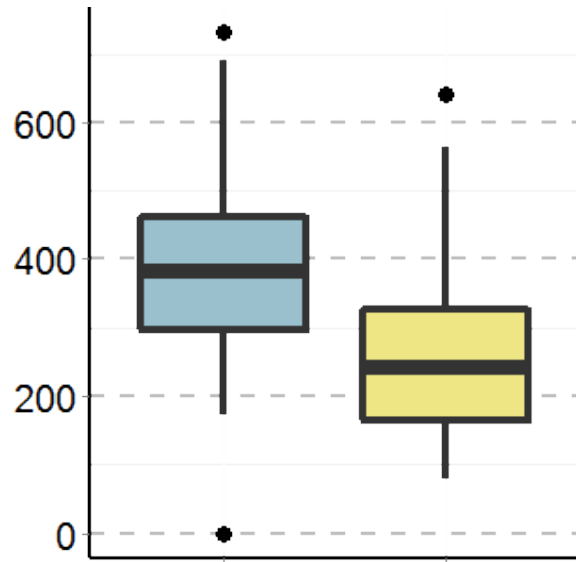

palmitic acid

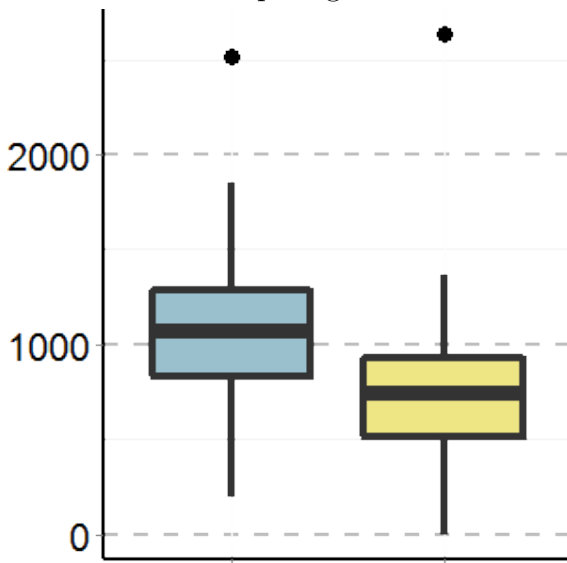

ornithine

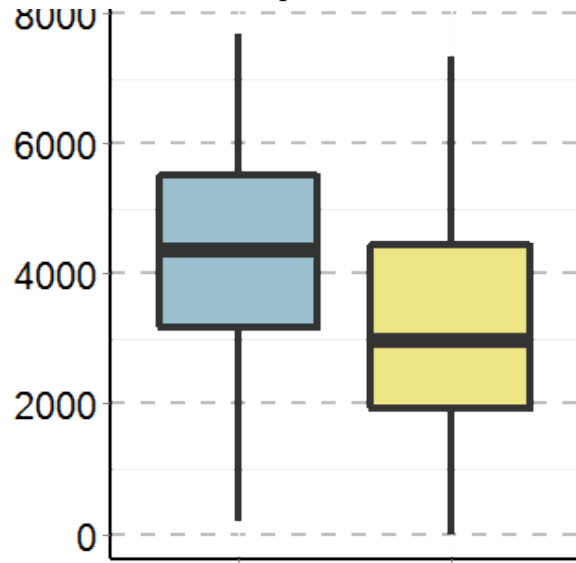

nicotinamide

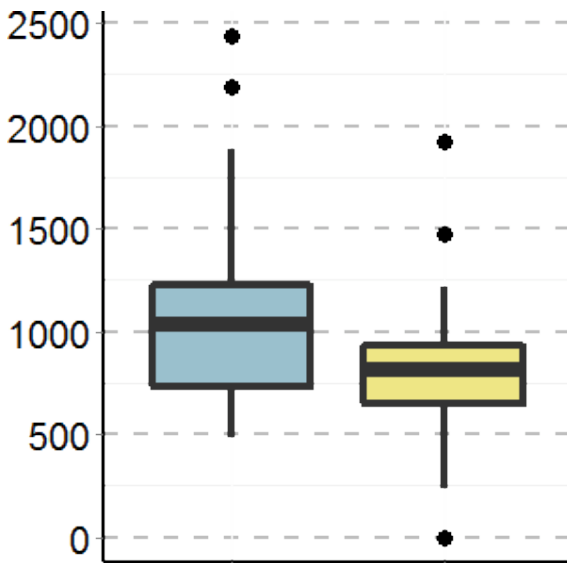

N-acetyl-D-mannosamine

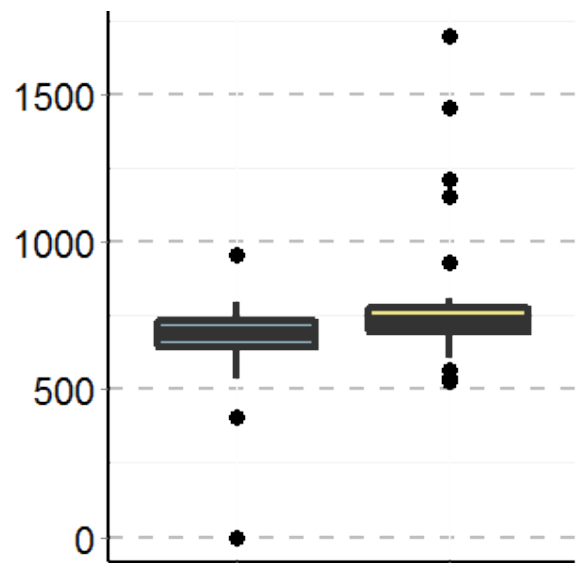

methionine sulfoxide

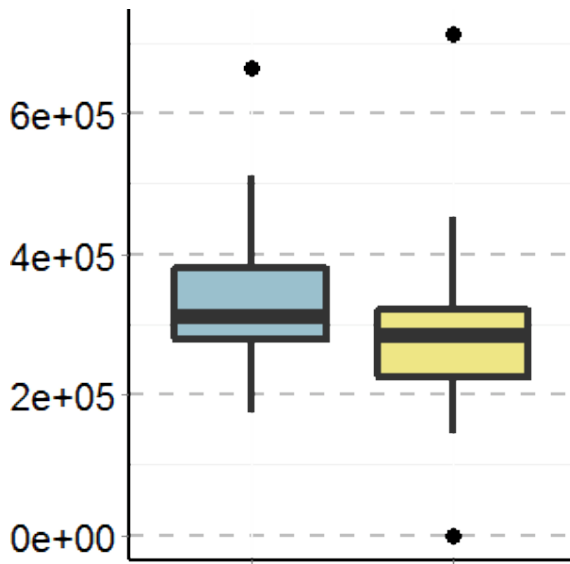

mannitol

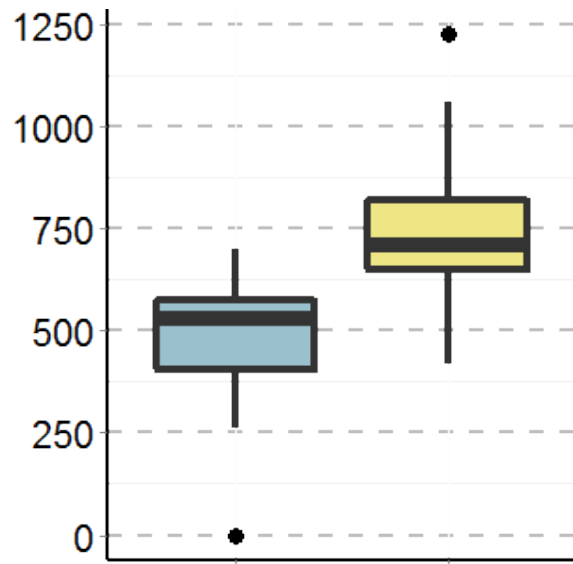

malic acid

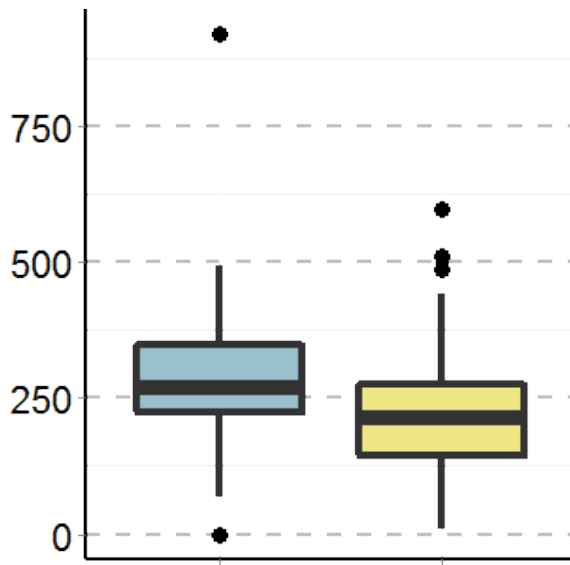

lysine

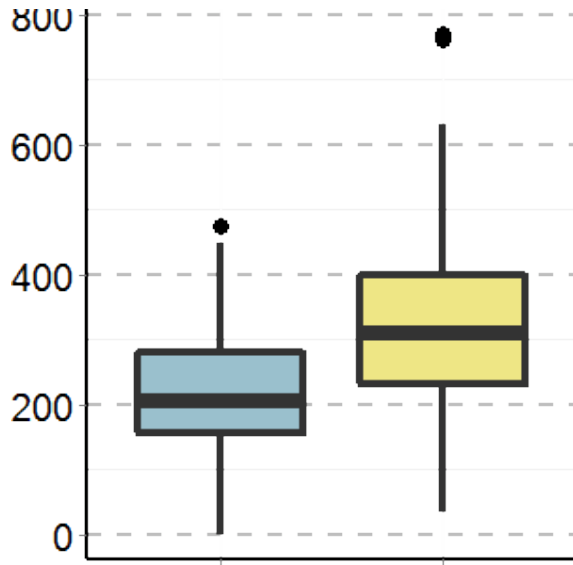

lauric acid

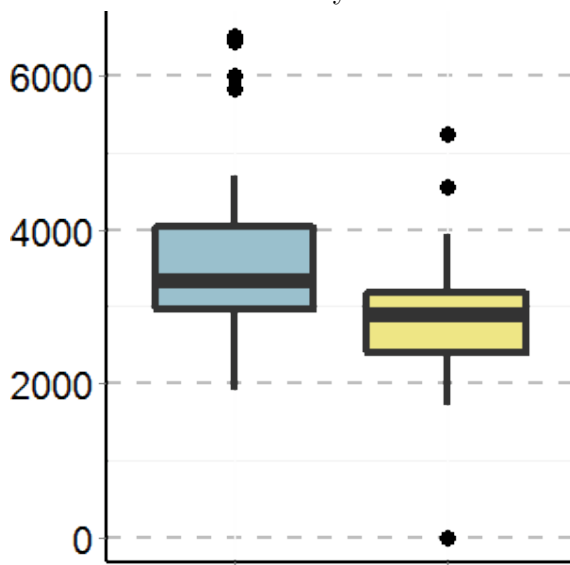

isothreonic acid

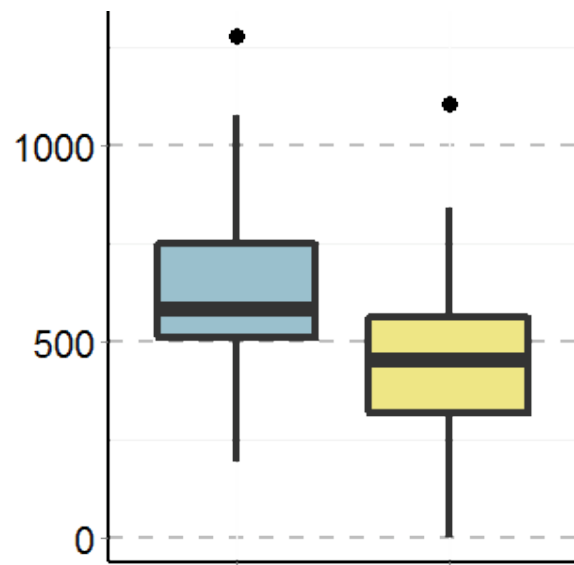

inositol-4-monophosphate

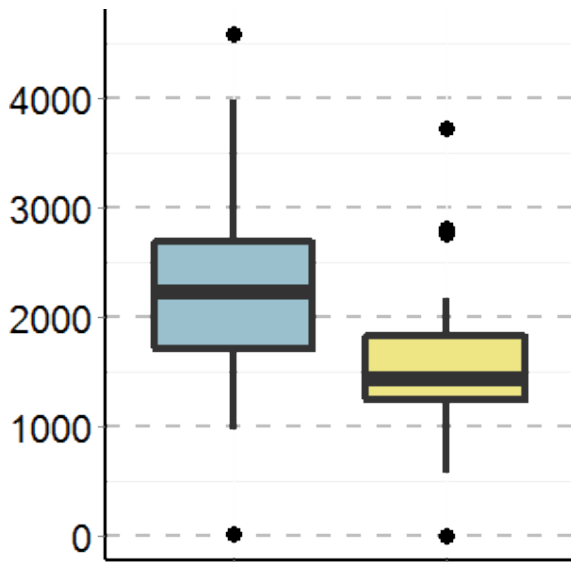

inosine 5'-monophosphate

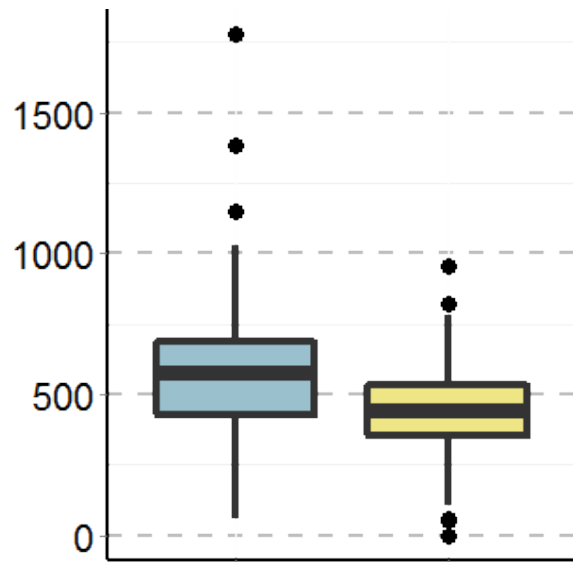

hydroxylamine

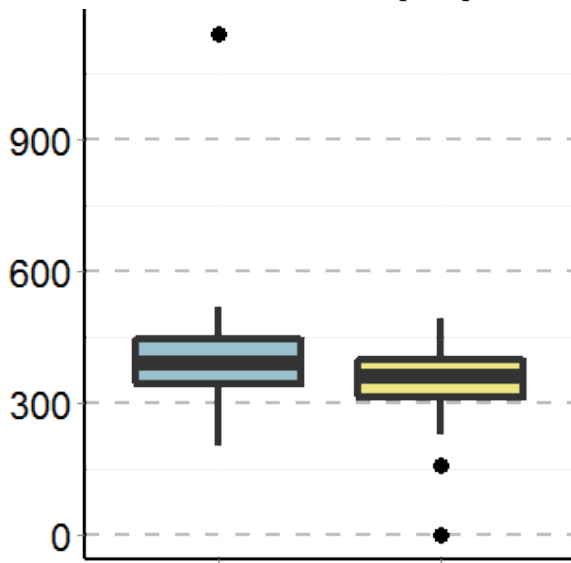

histidine

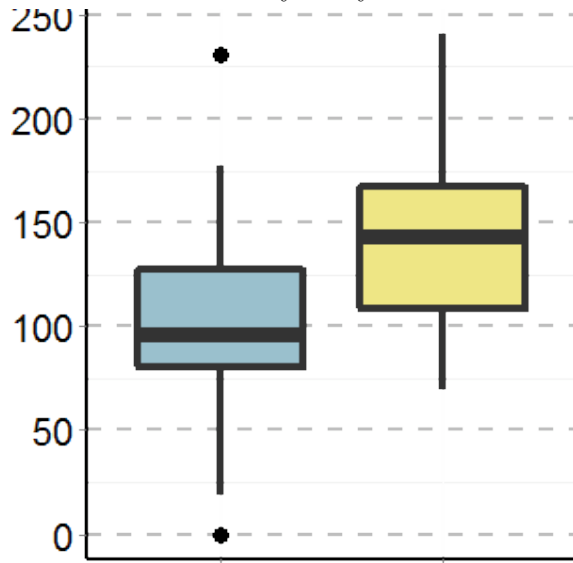

glycerol-3-galactoside

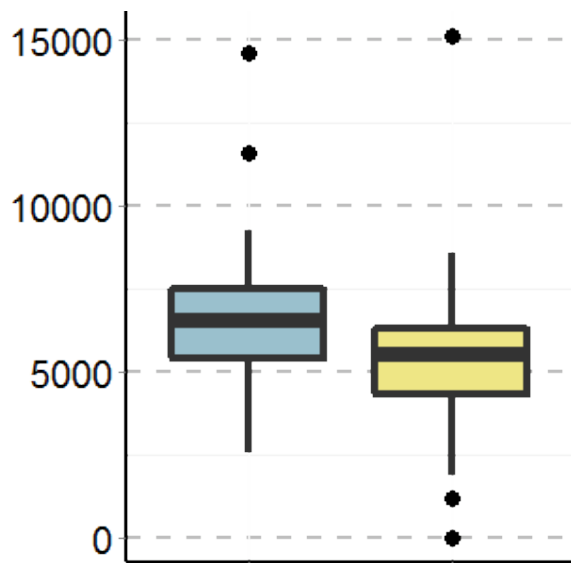

glycerol

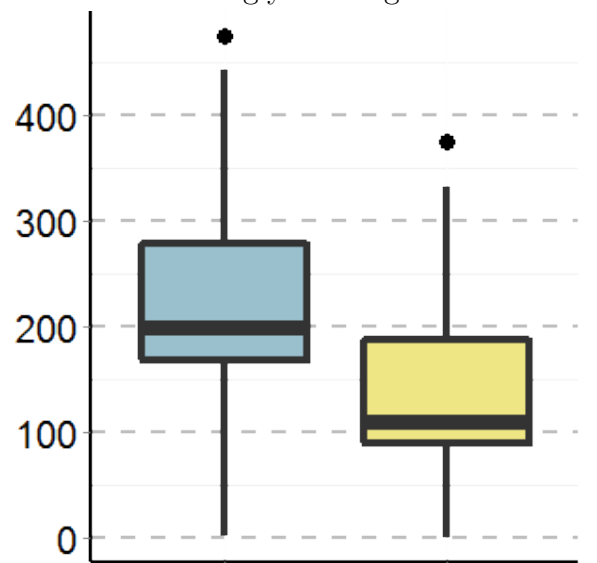

glyceric acid

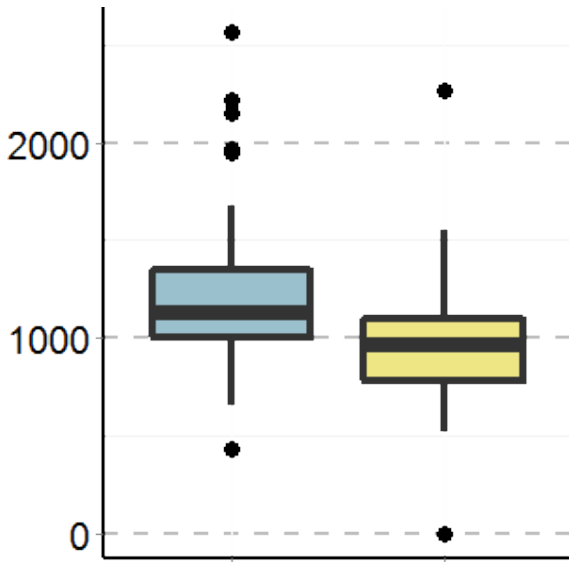

glutamic acid

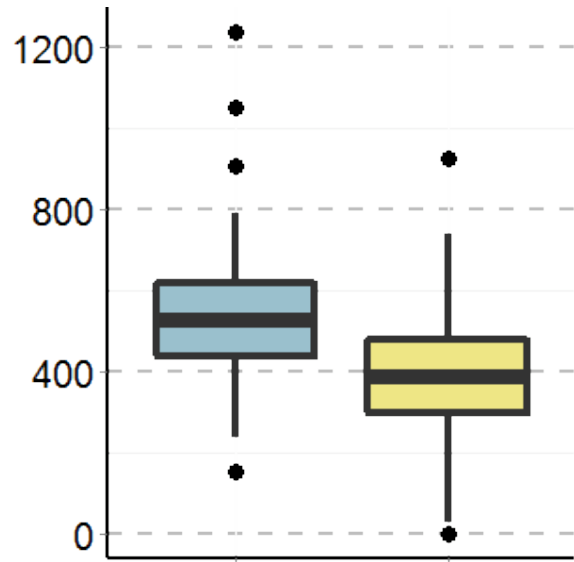

glucose

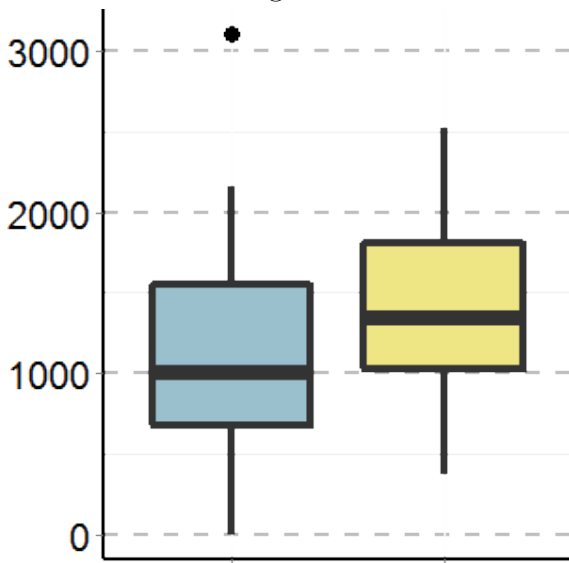

gluconic acid

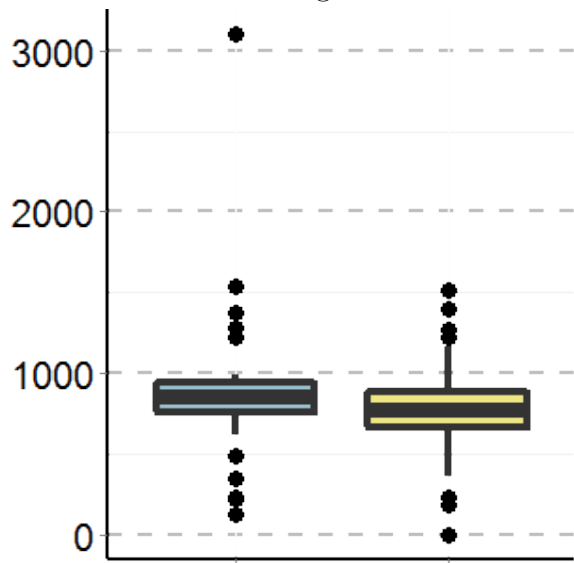

gamma-tocopherol

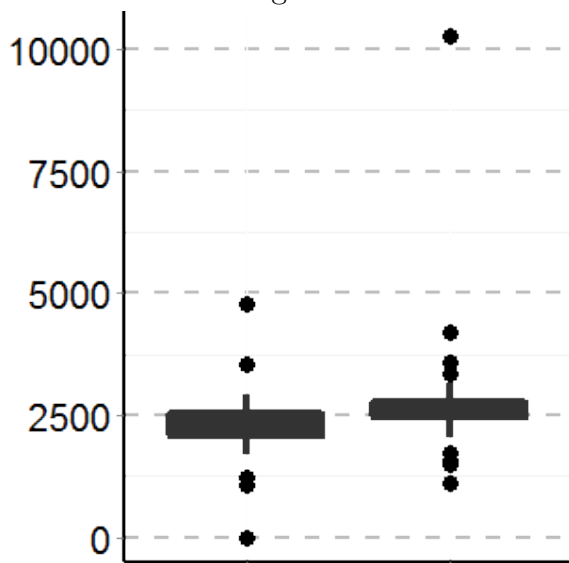

fucose+ rhamnose

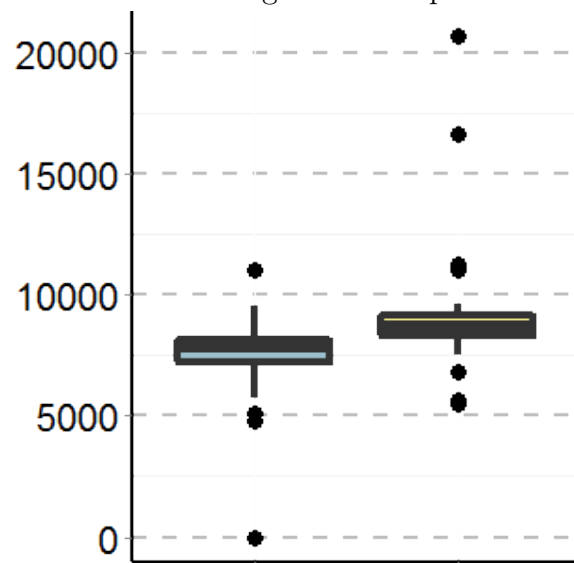

fucose

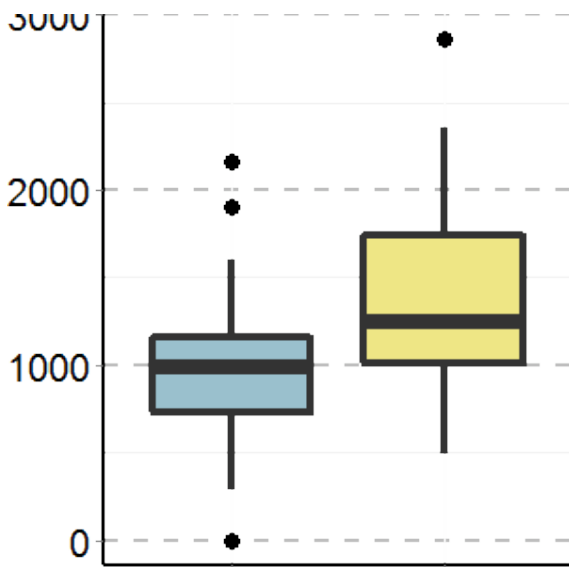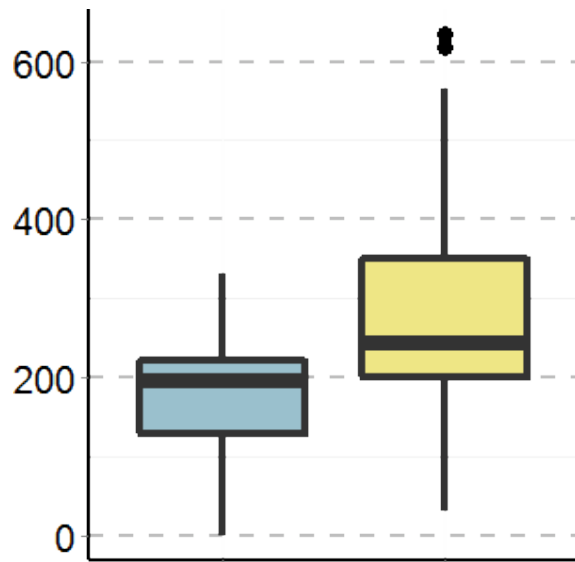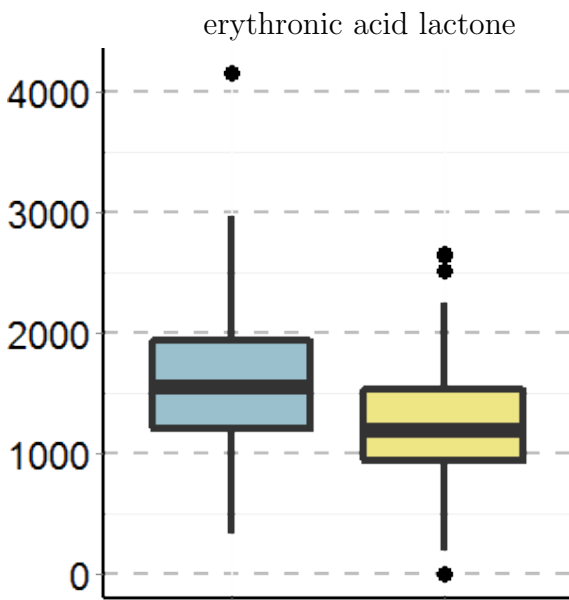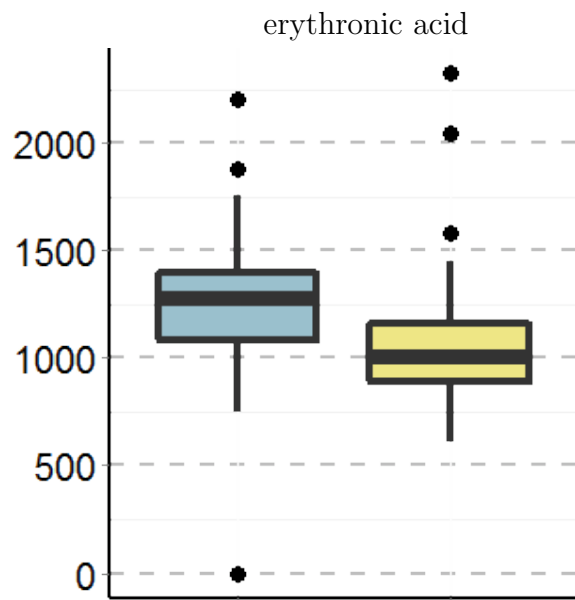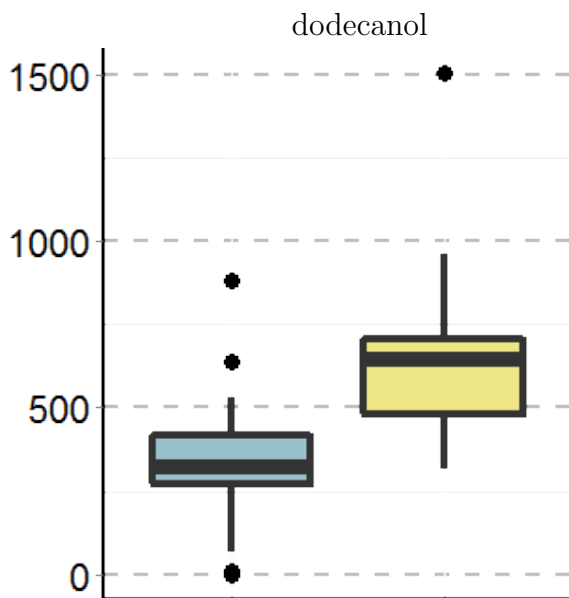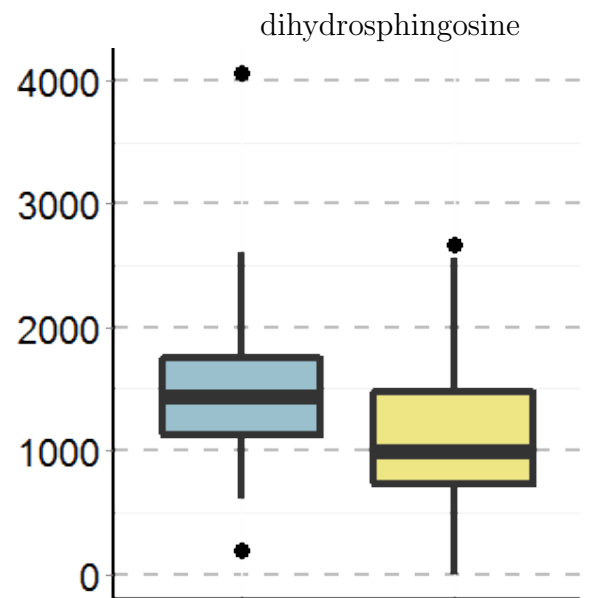



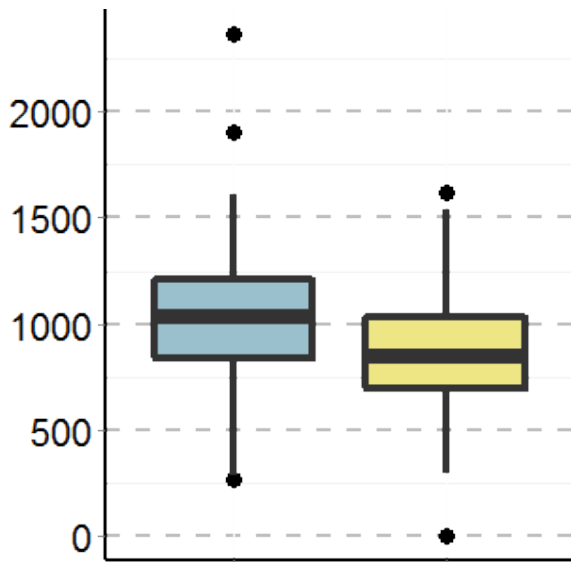

creatinine

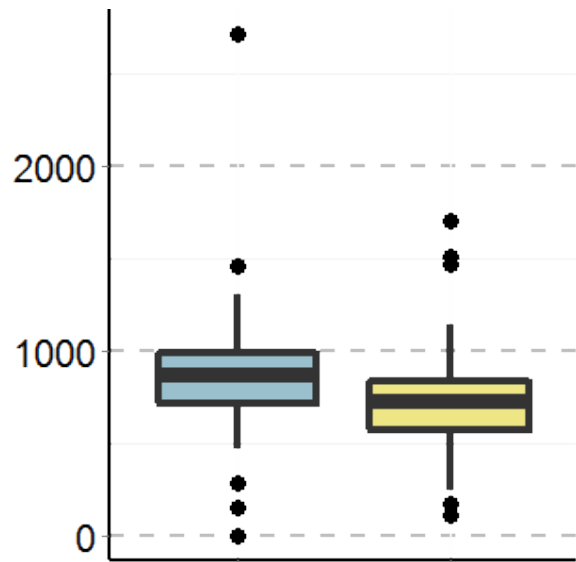

citrulline

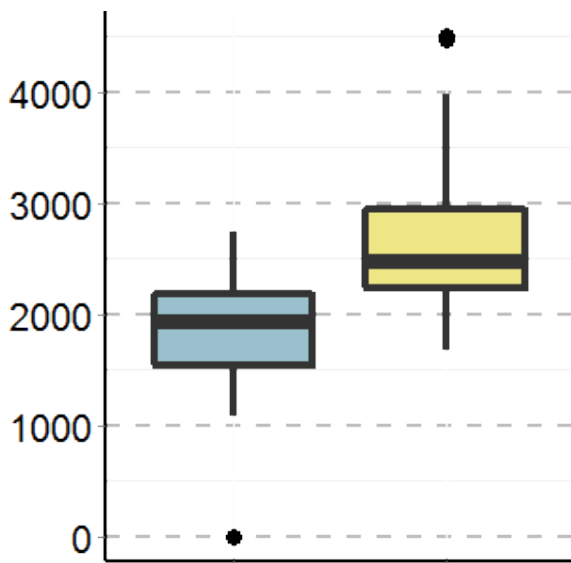

citric acid

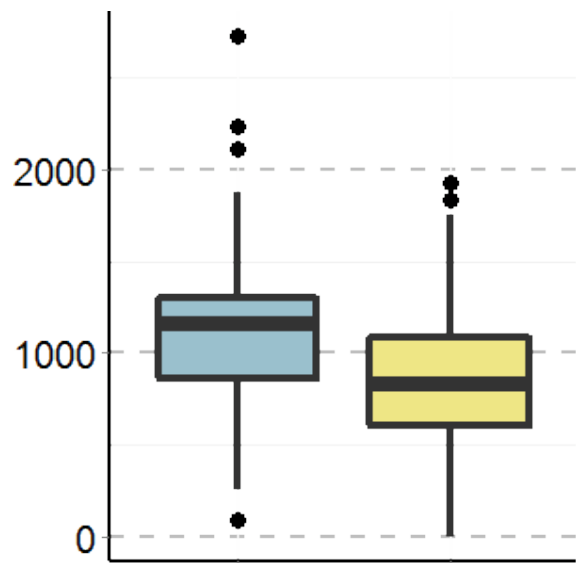

caprylic acid

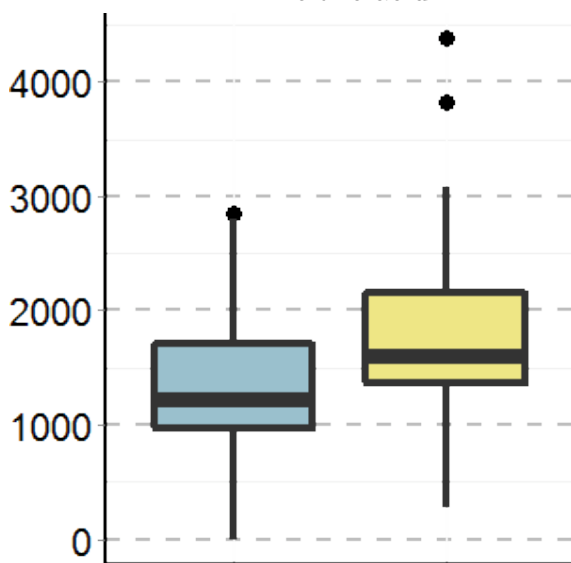

capric acid

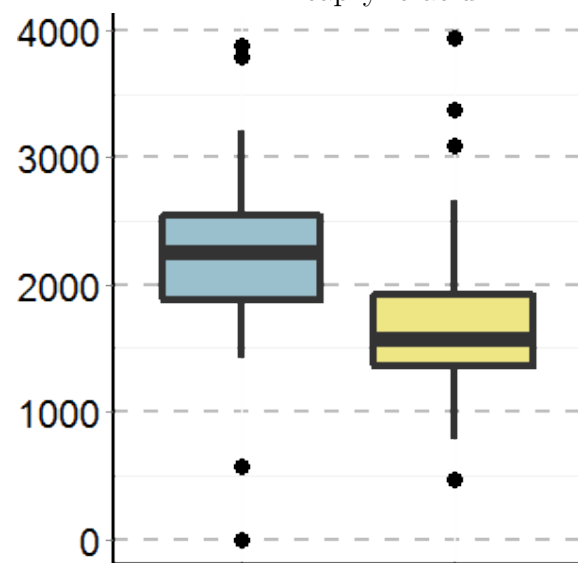

biuret

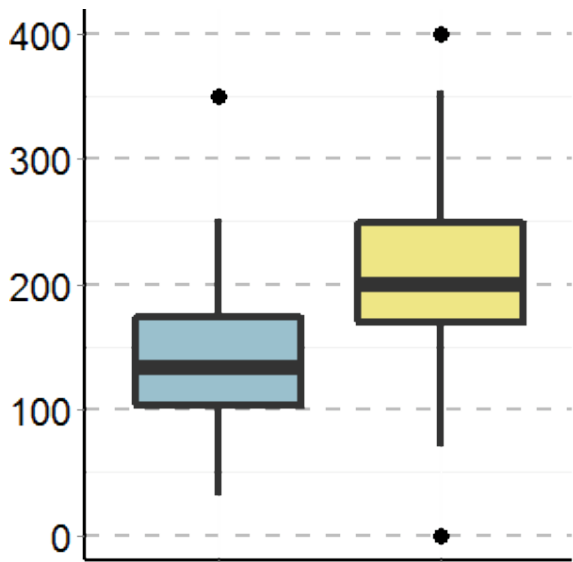

benzoic acid

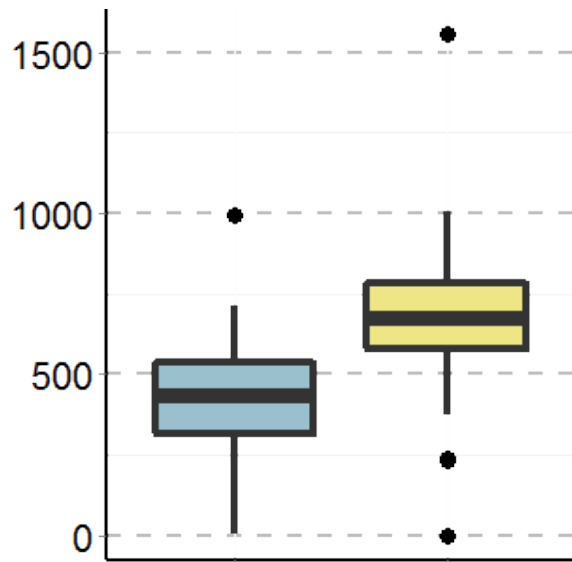

arachidonic acid

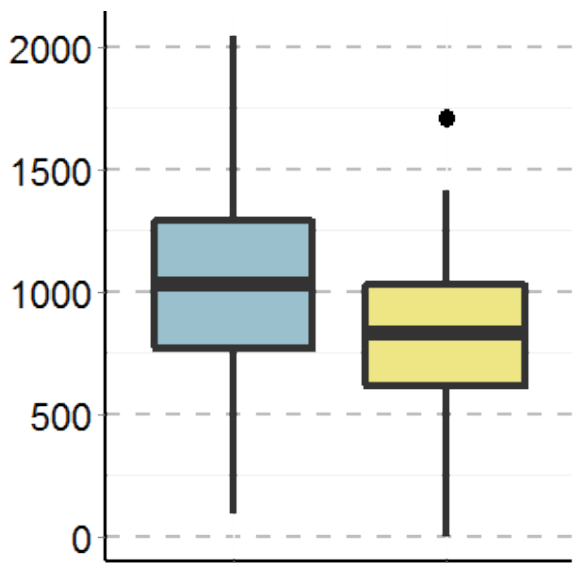

arabitol

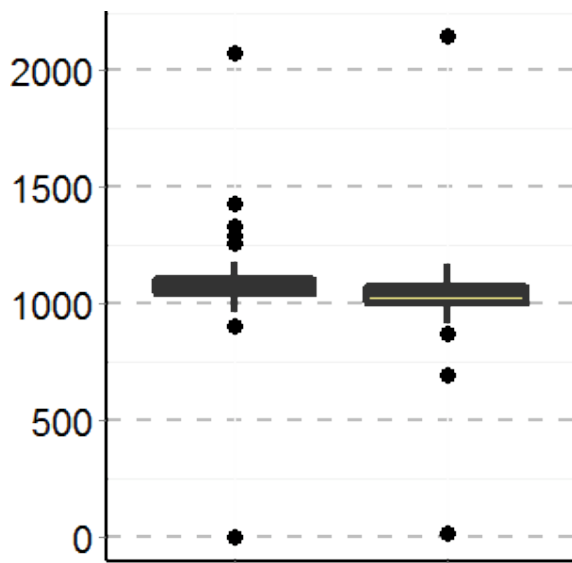

arabinose

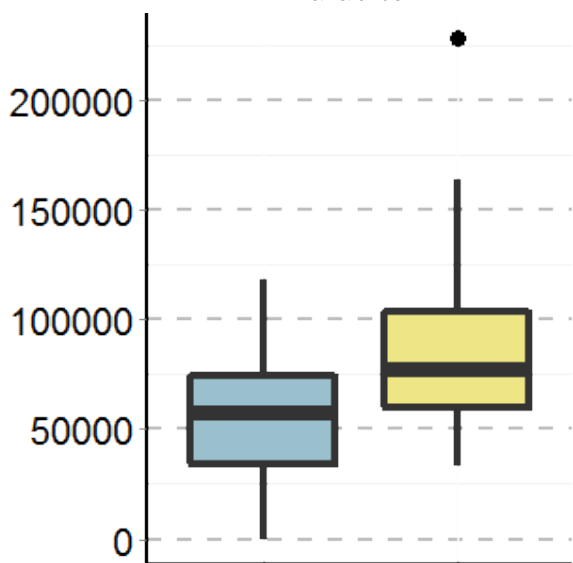

aminomalonic acid

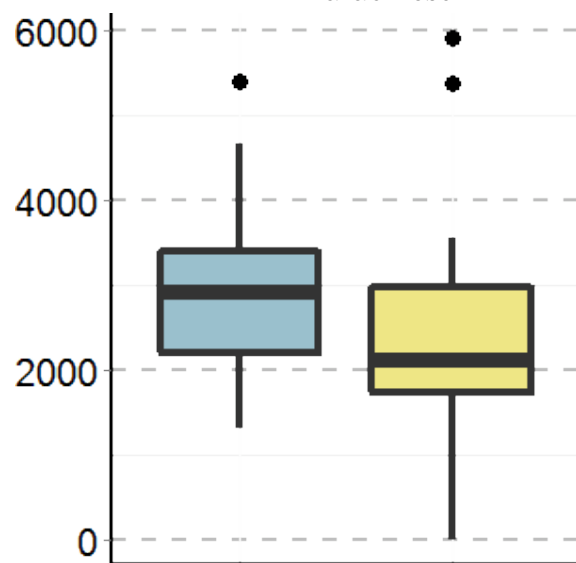

allantoic acid

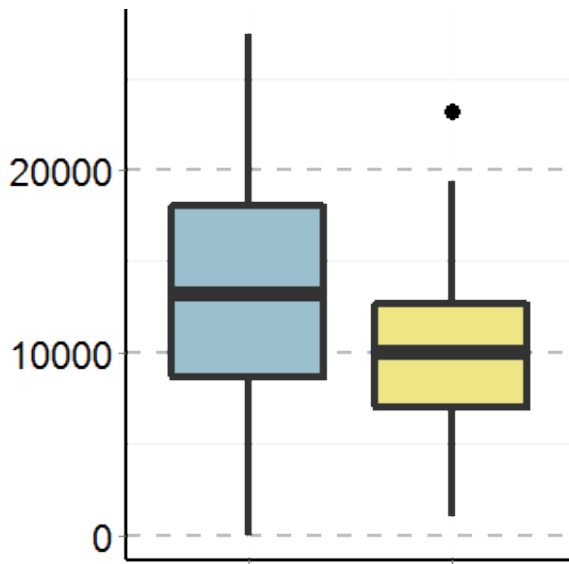

alanine

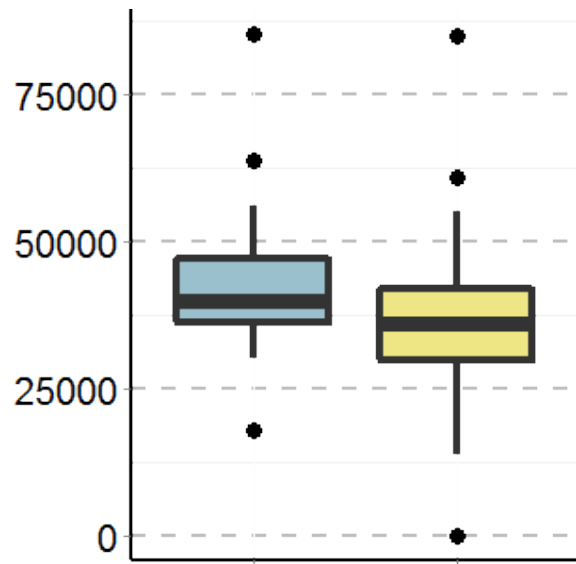

adenosine-5-phosphate

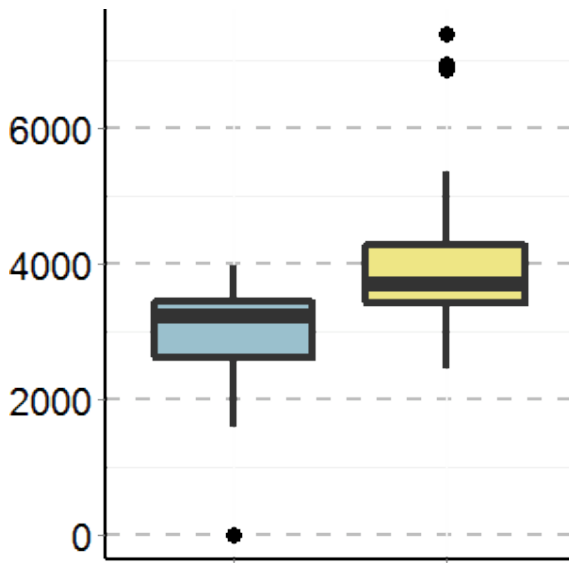

adenine

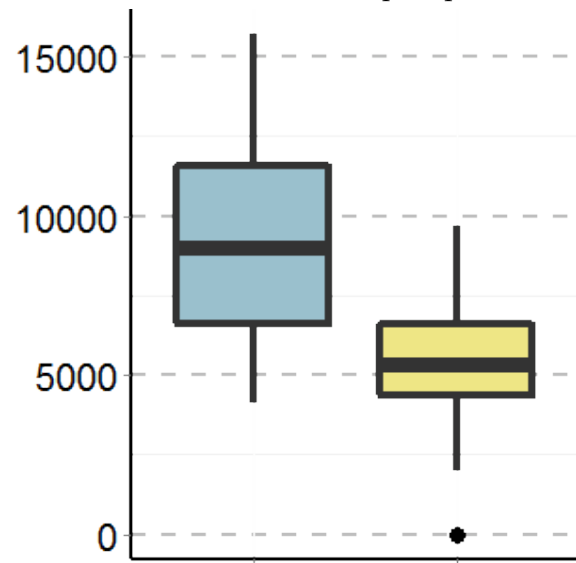

5'-deoxy-5'-methylthioadenosine

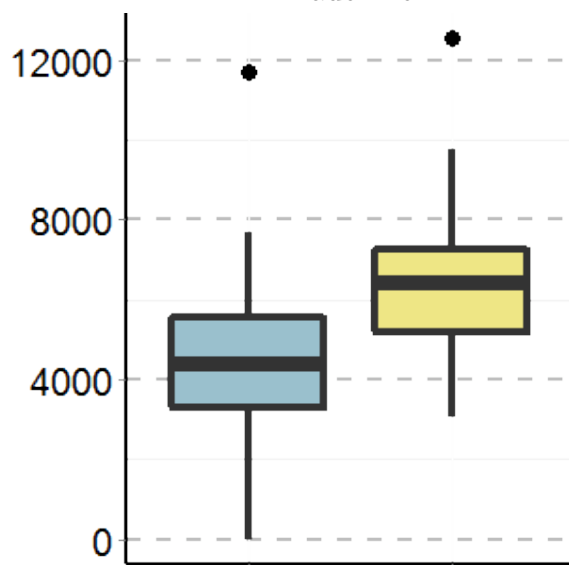

5,6-dihydrouracil

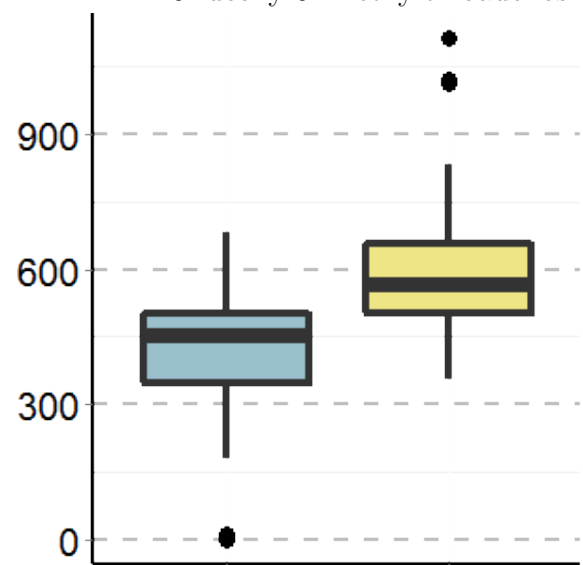

4-hydroxybutyric acid

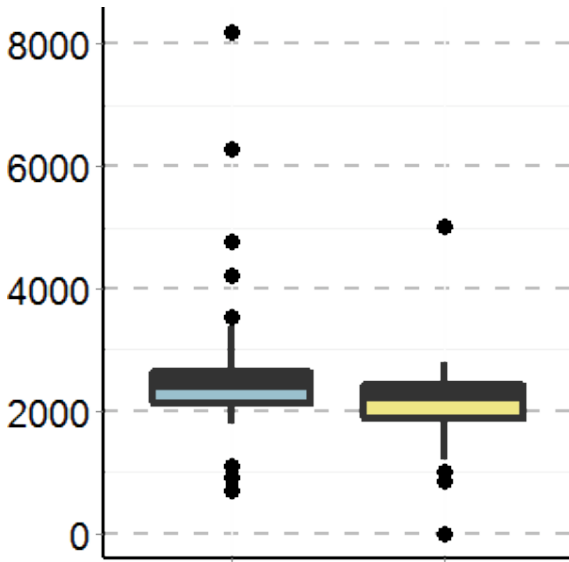

3-phosphoglycerate

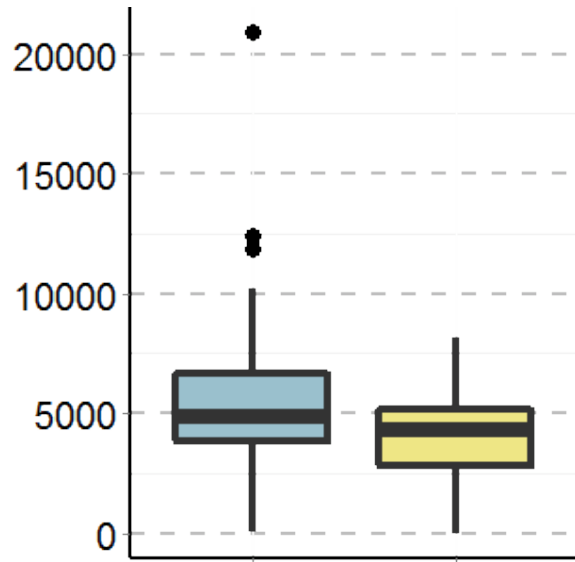

2-hydroxyglutaric acid

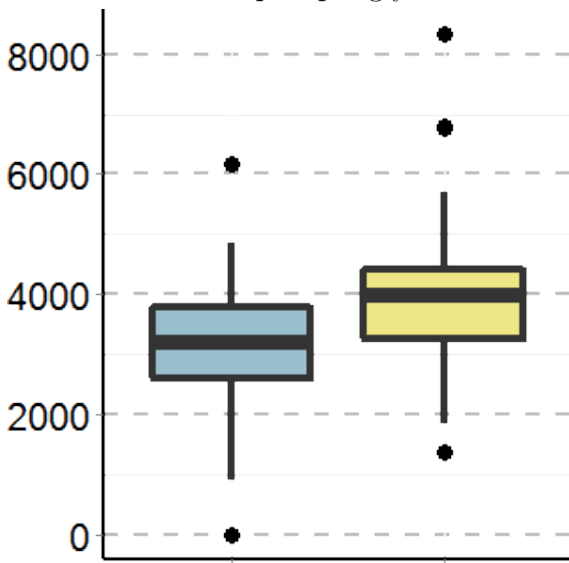

1-monostearin

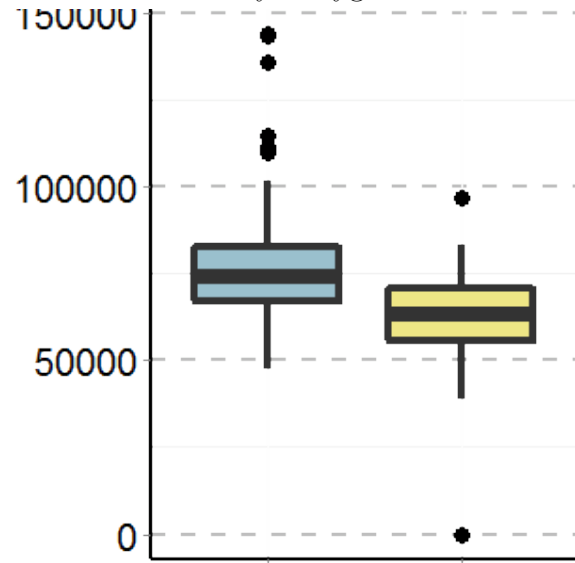

1-monopalmitin

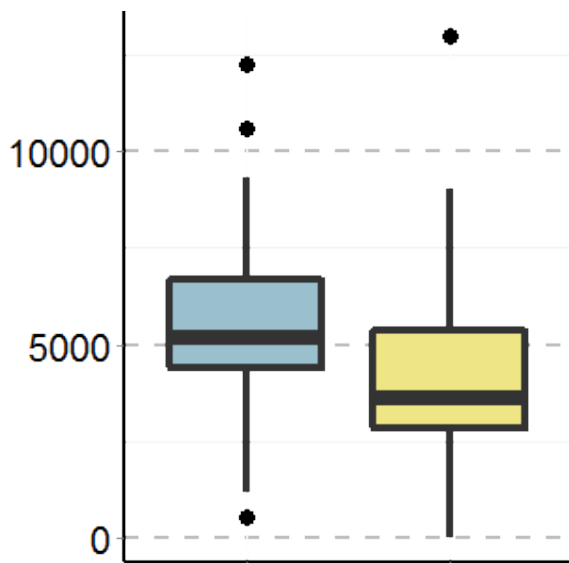

1,5-anhydroglucitol

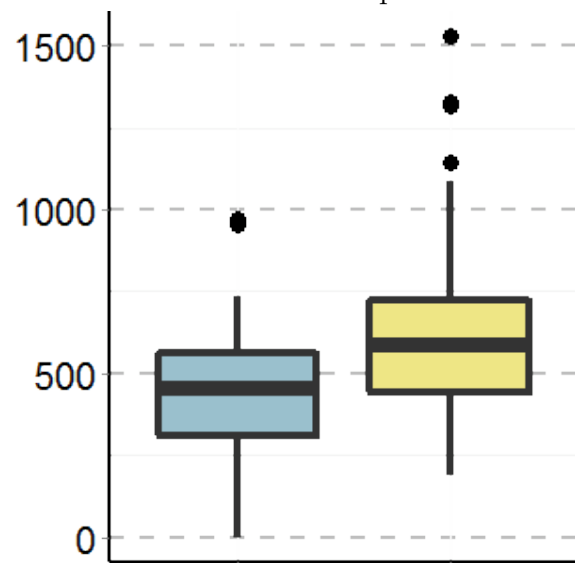

199777

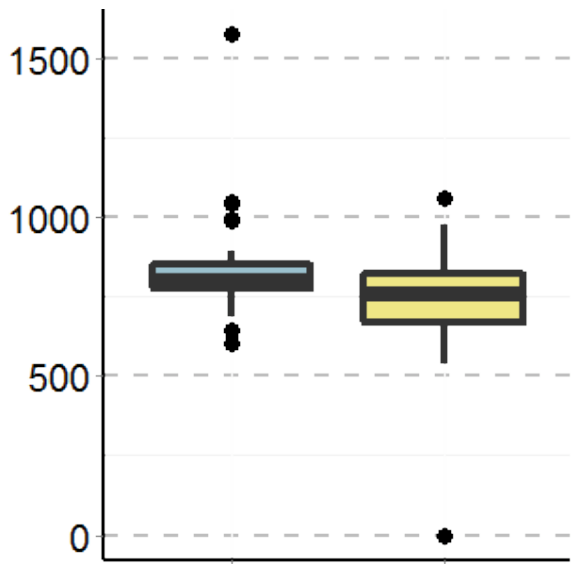

199794

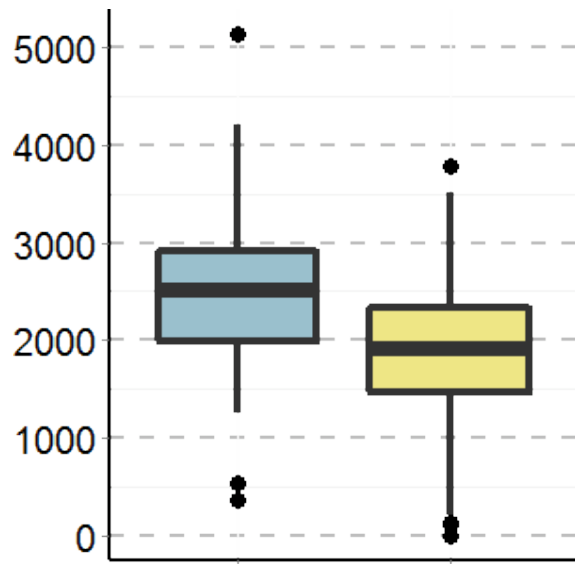

199806

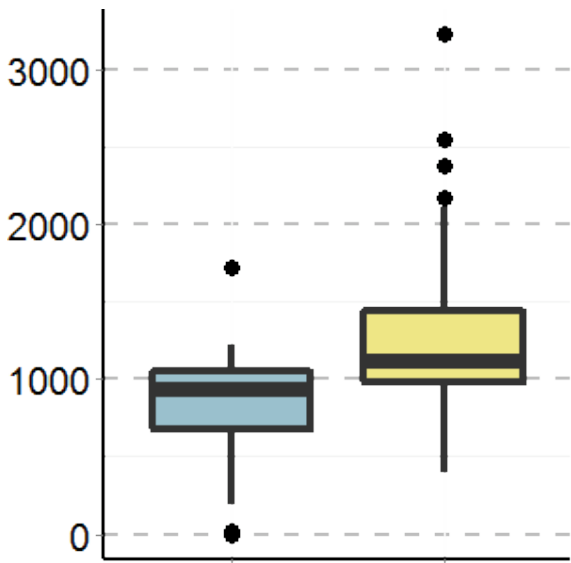

200791

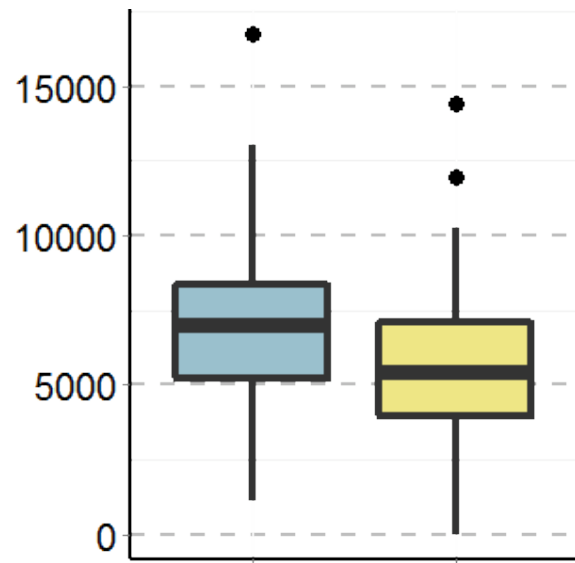

200850

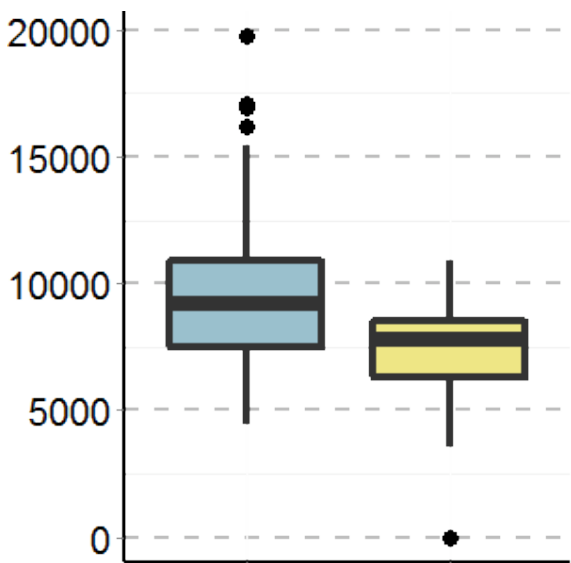

200906

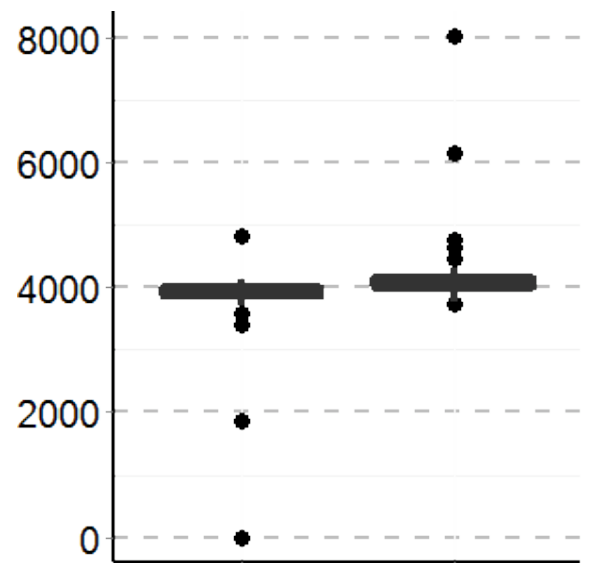

201862

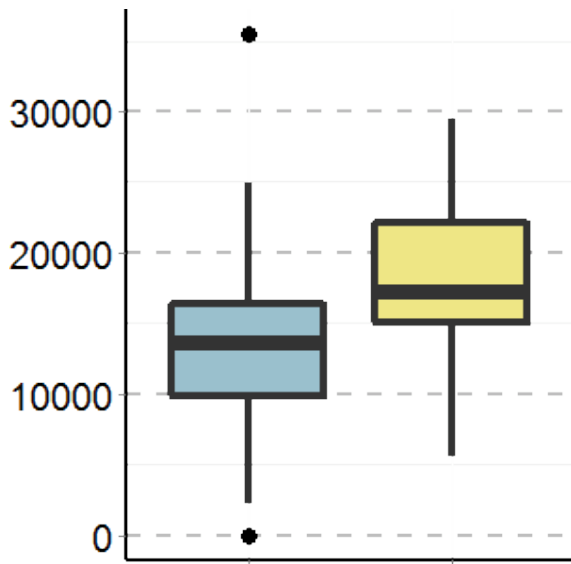

203221

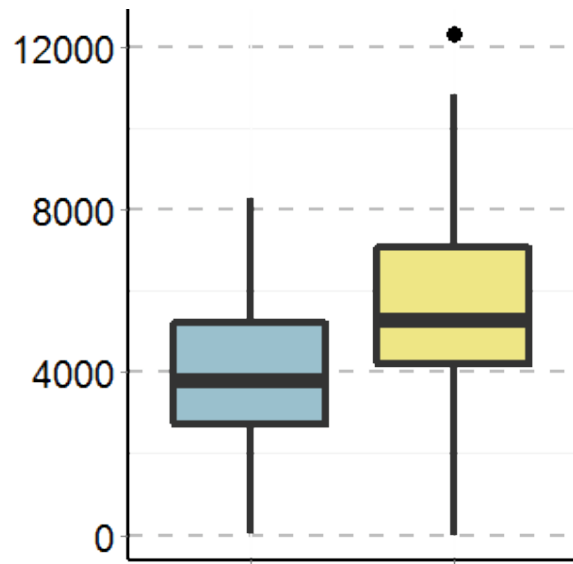

204079

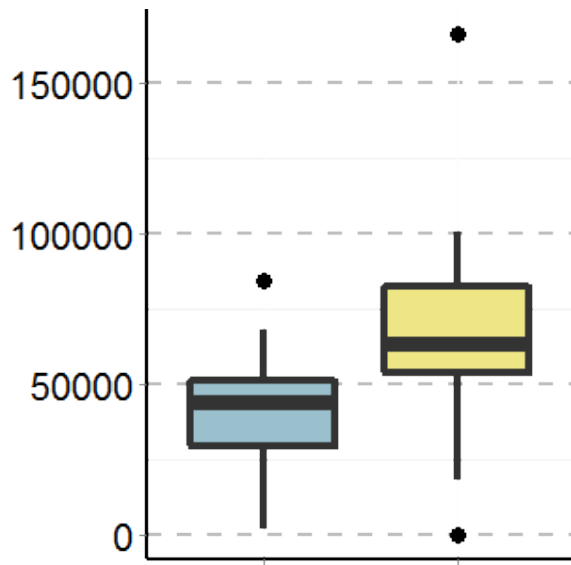

205734

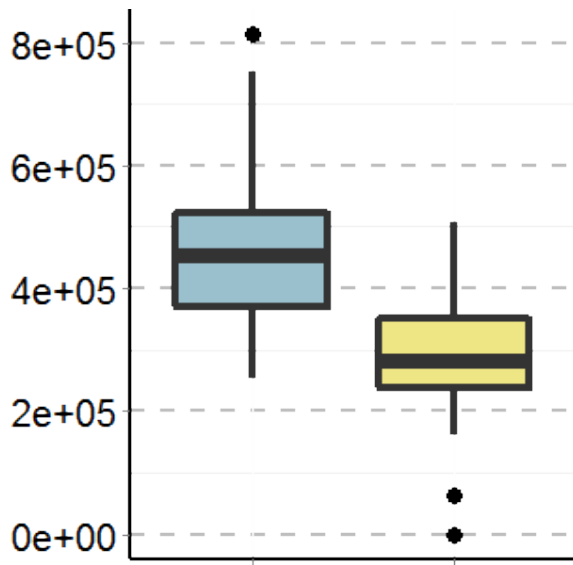

208557

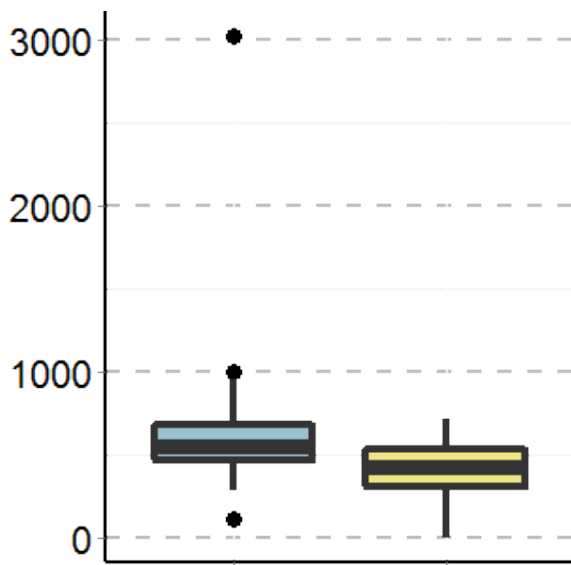

210286

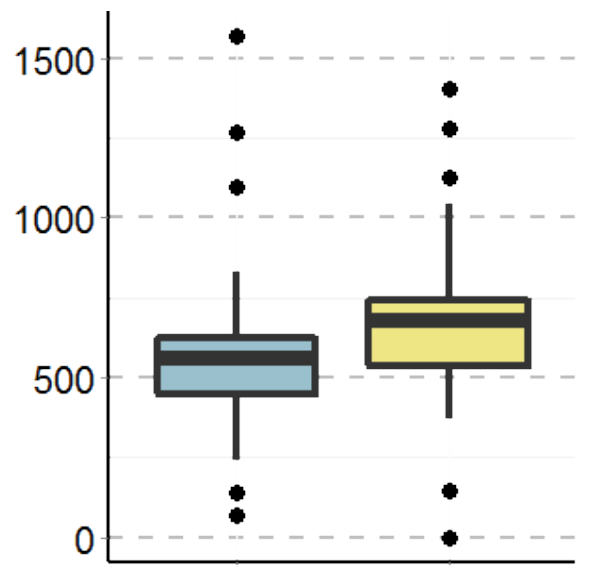

211946

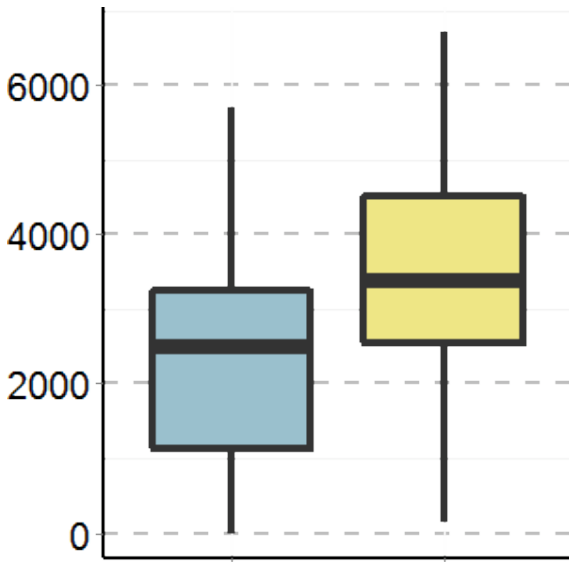

212251

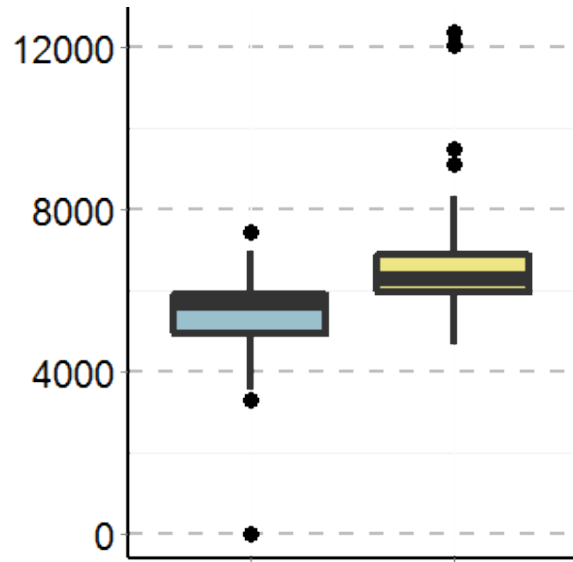

213353

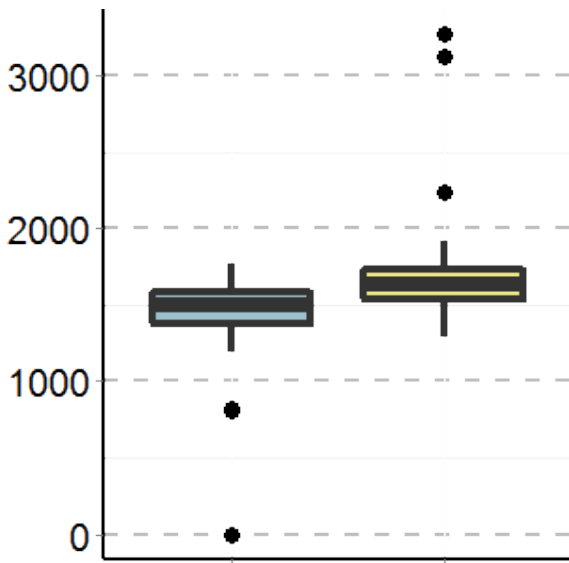

213968

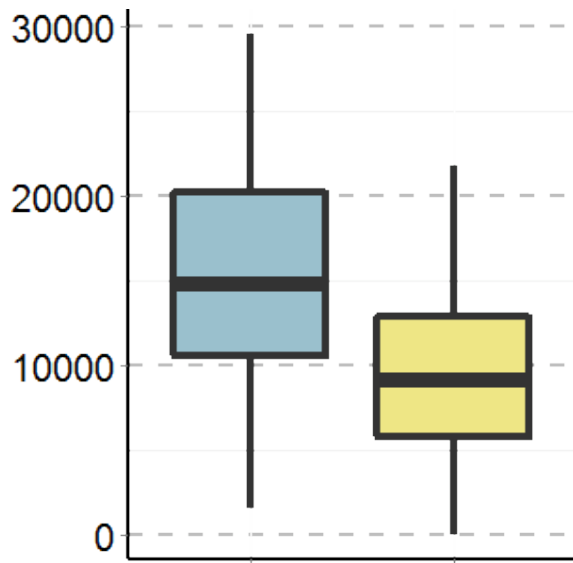

213974

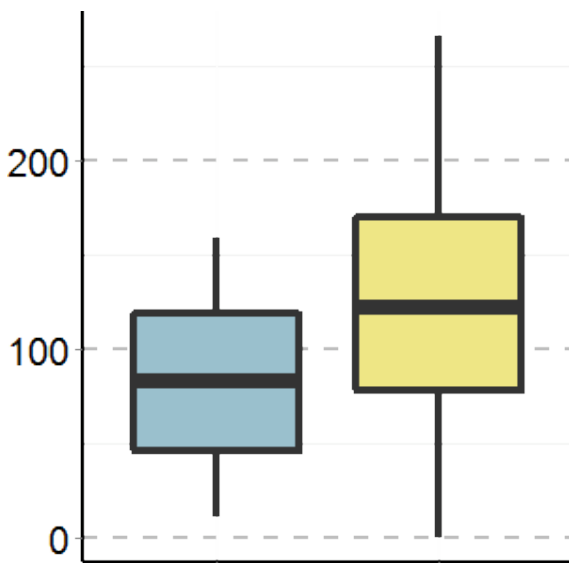

217797

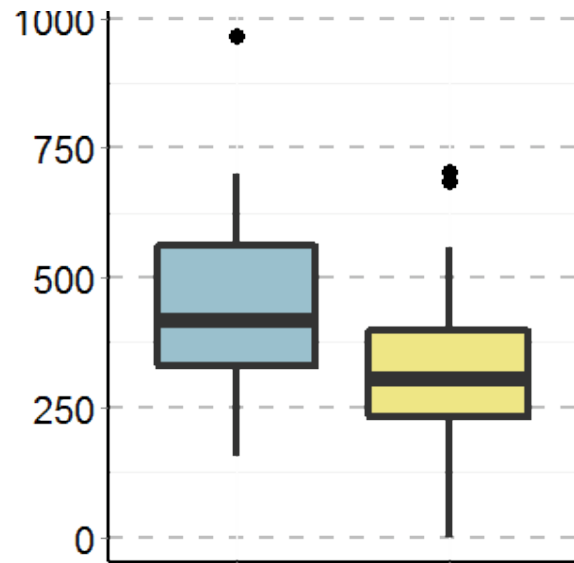

218839

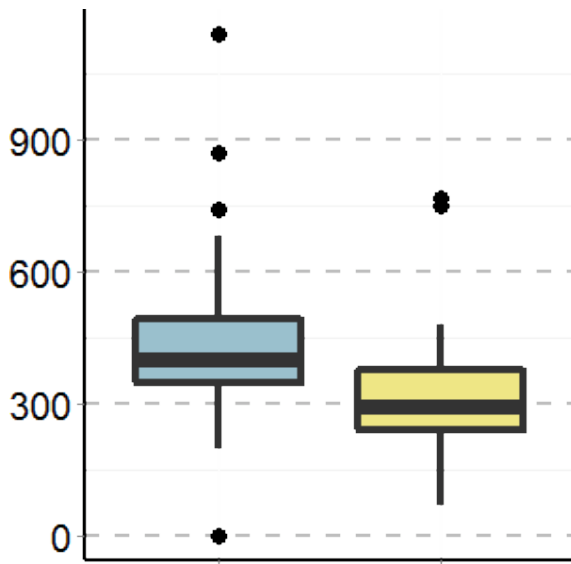

218951

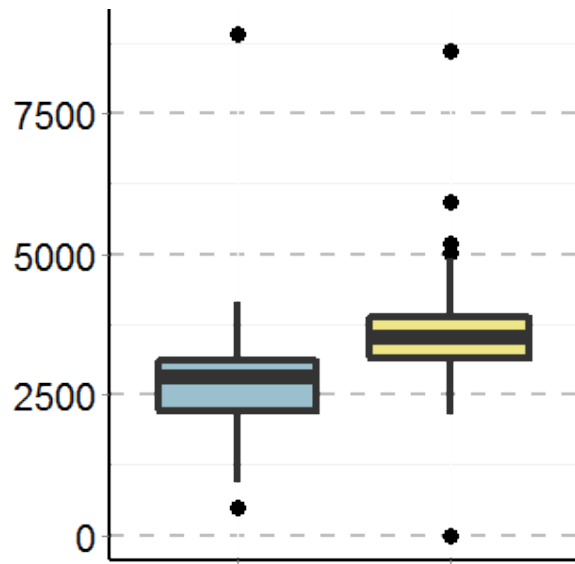

221505

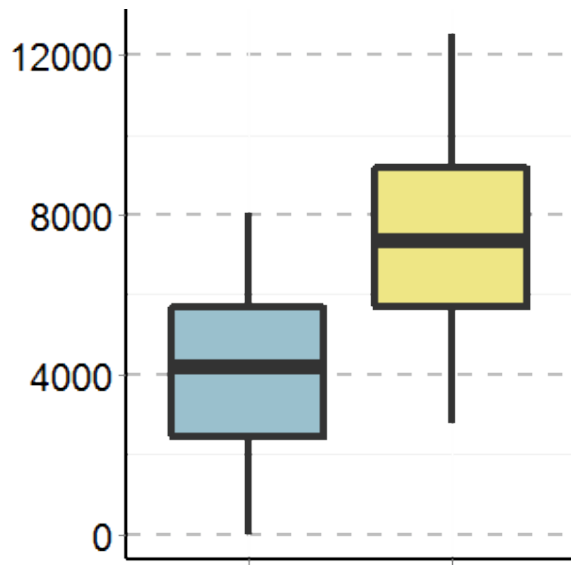

221574

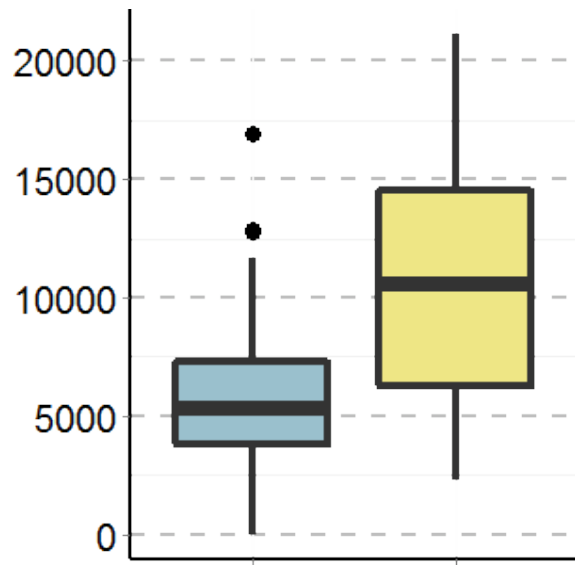

222169

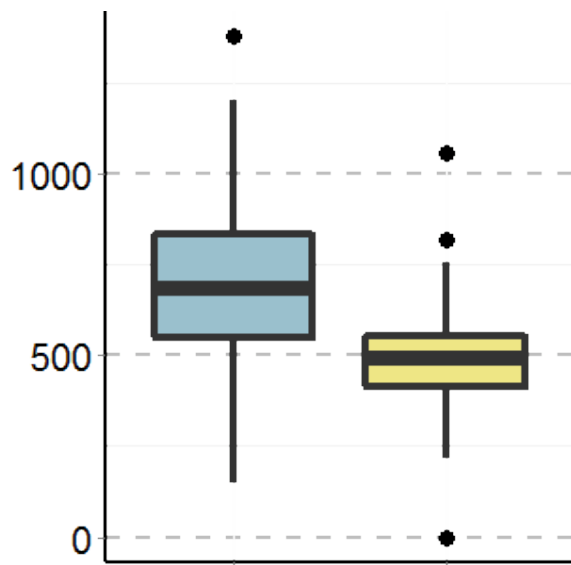

223121

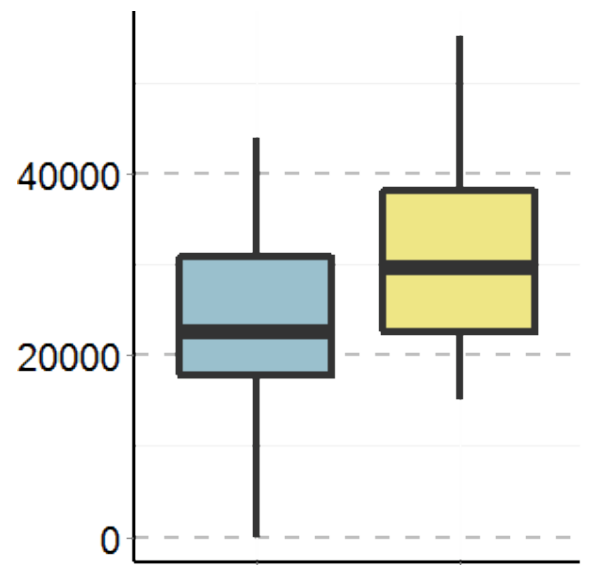

223629



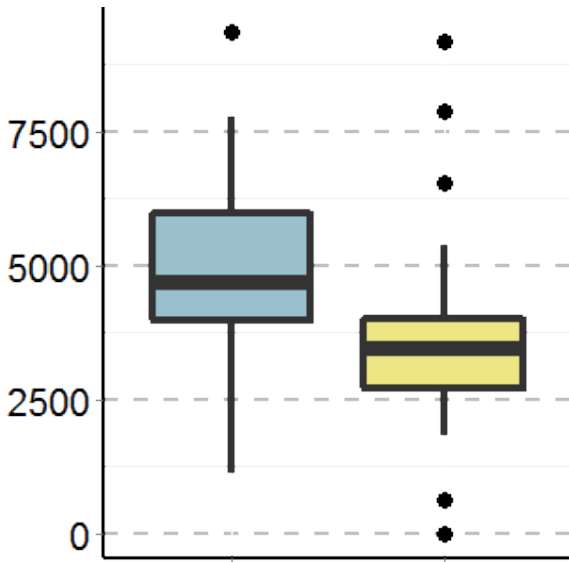

225283

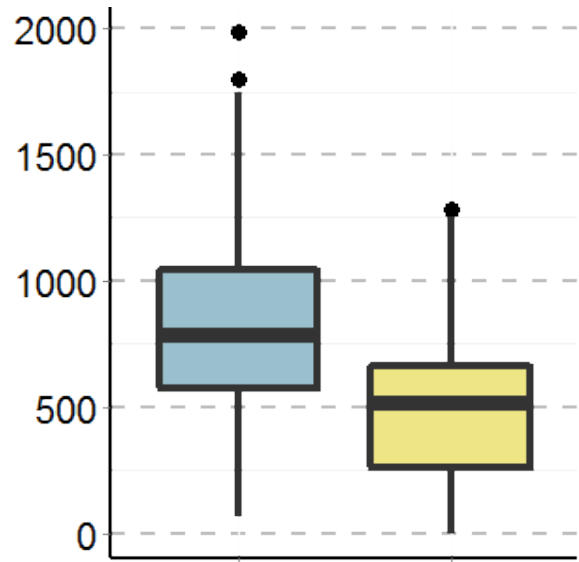

225555

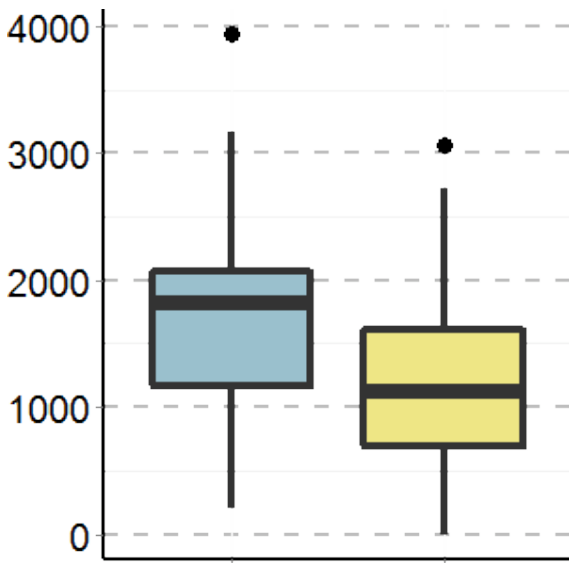

226845

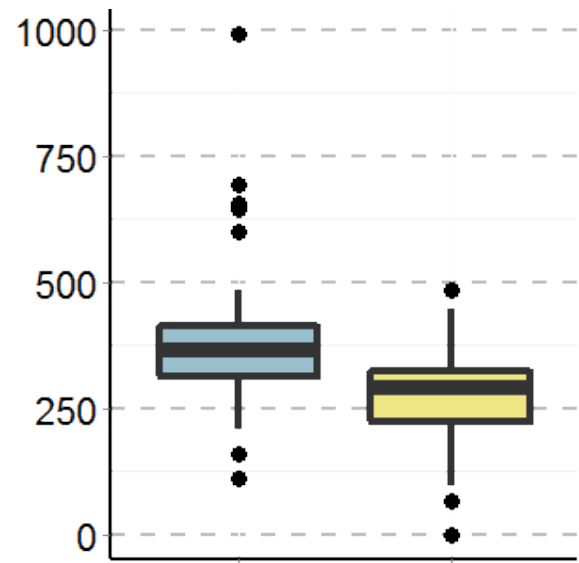

227601

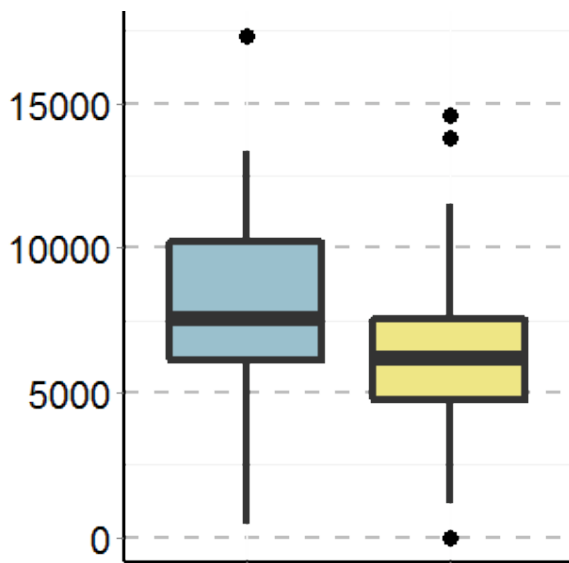

227703

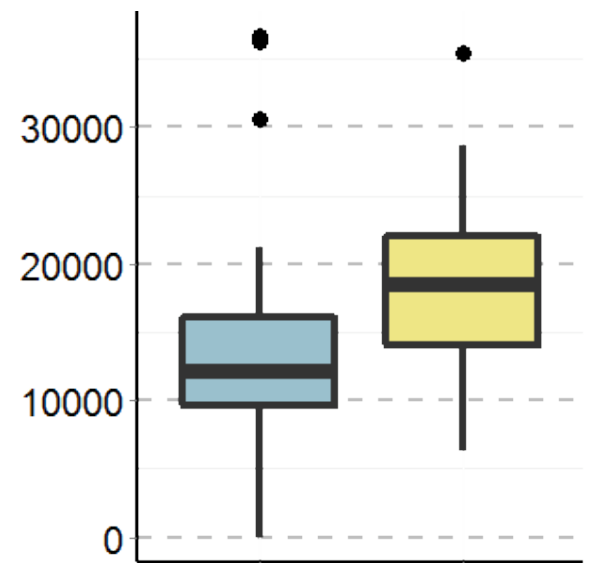

228143

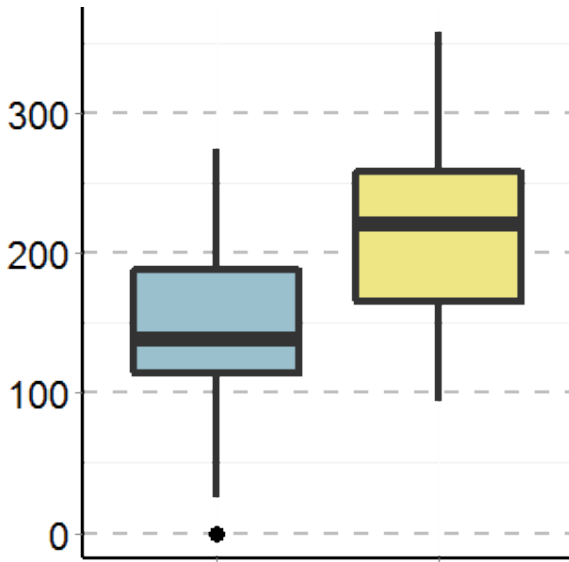

228587

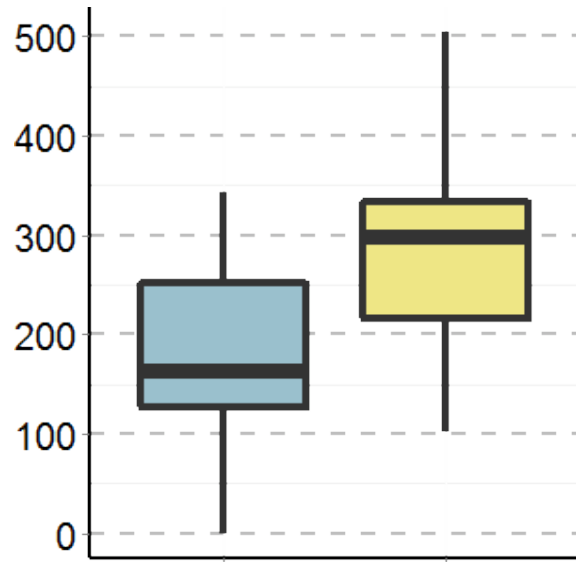

228983

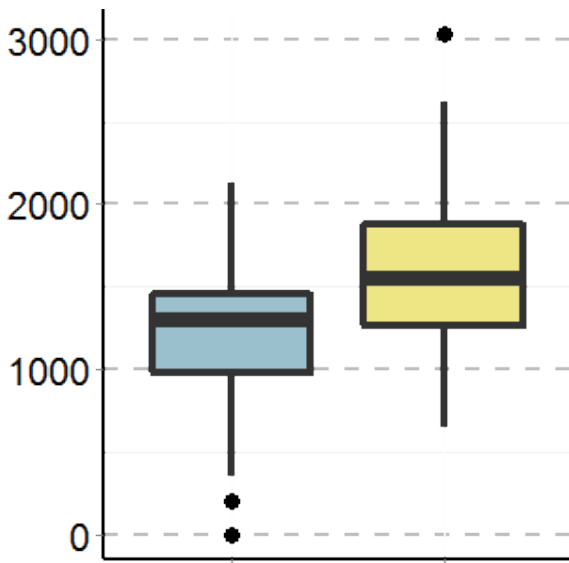

229203

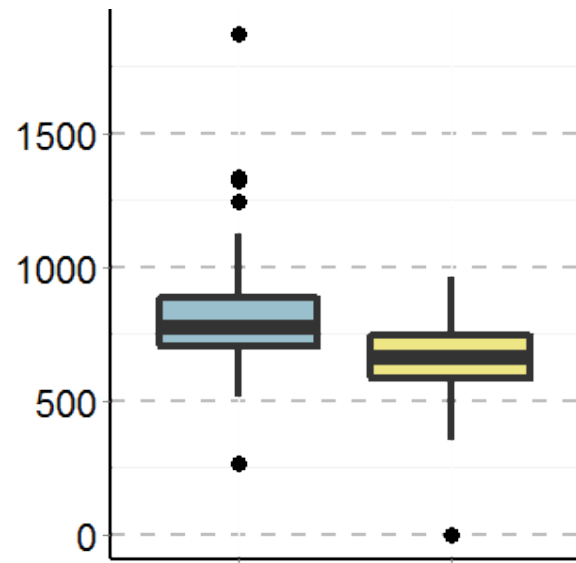

231657

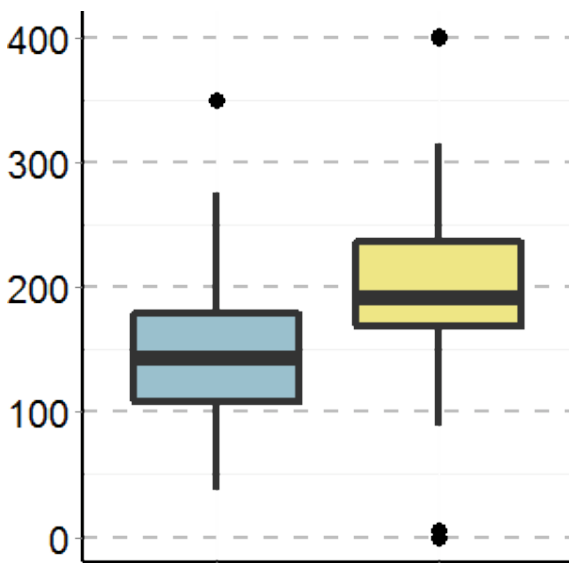

233287

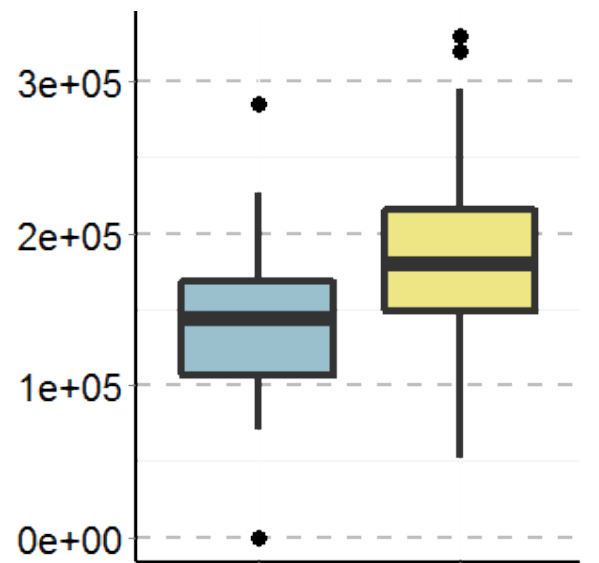

234567

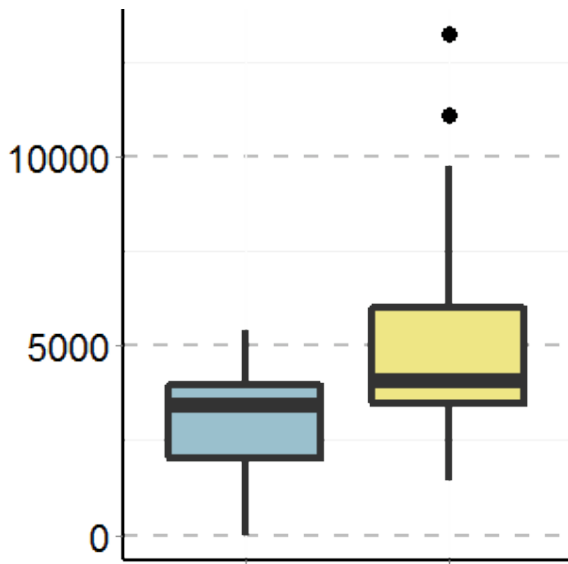

236890

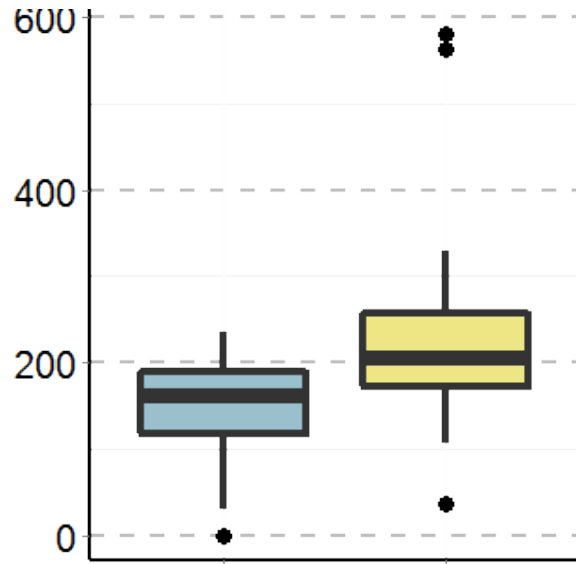

238437

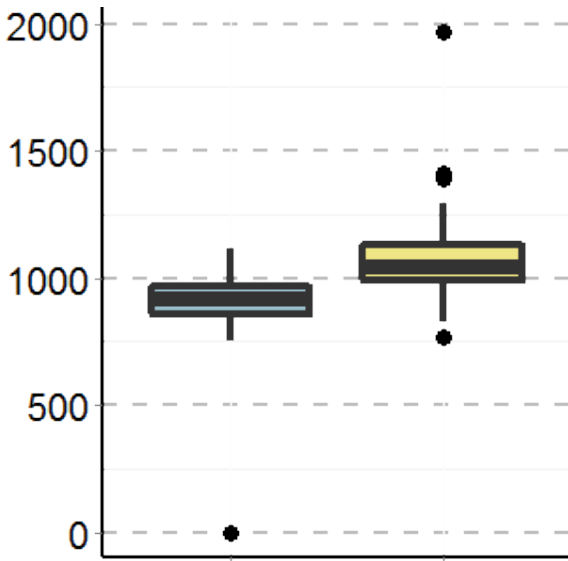

240551

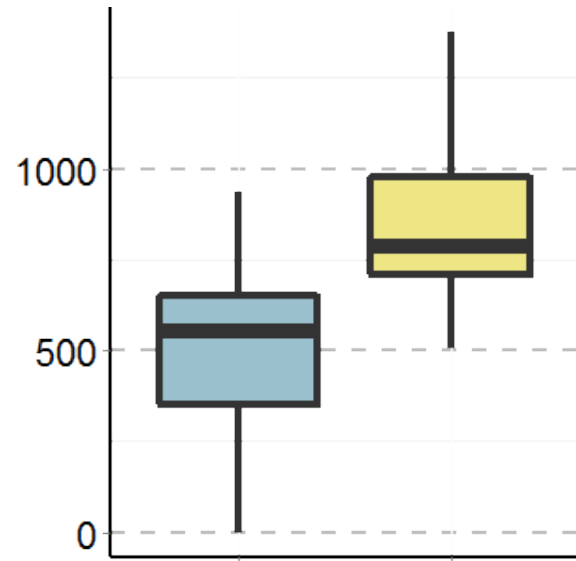

241063

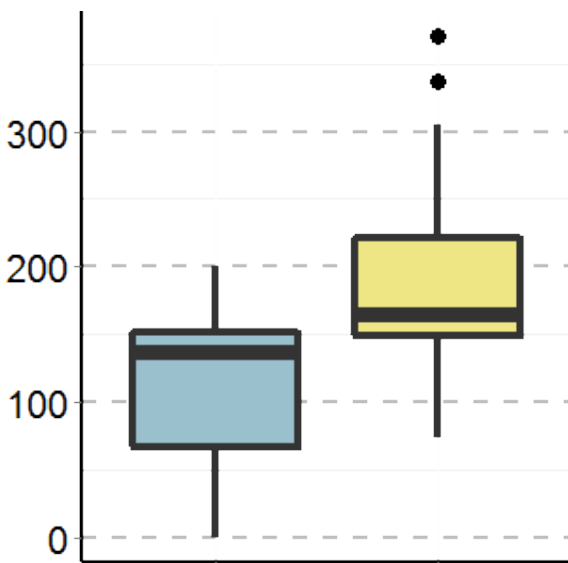

241389

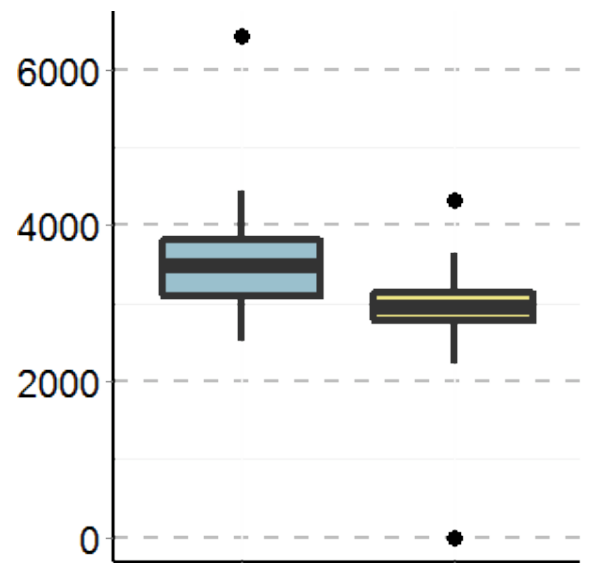

242128

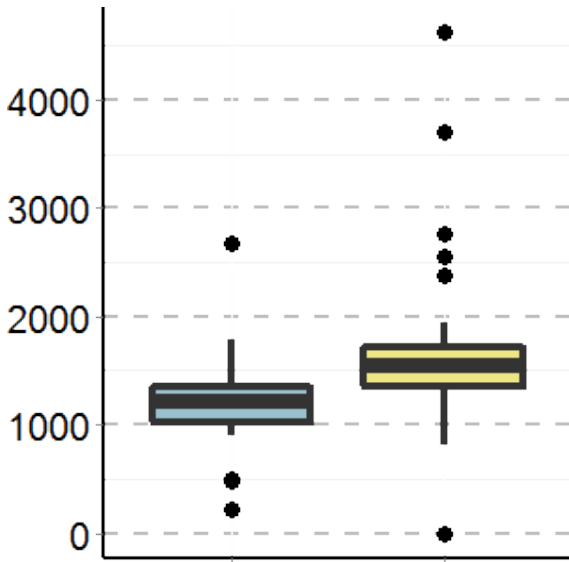

242219

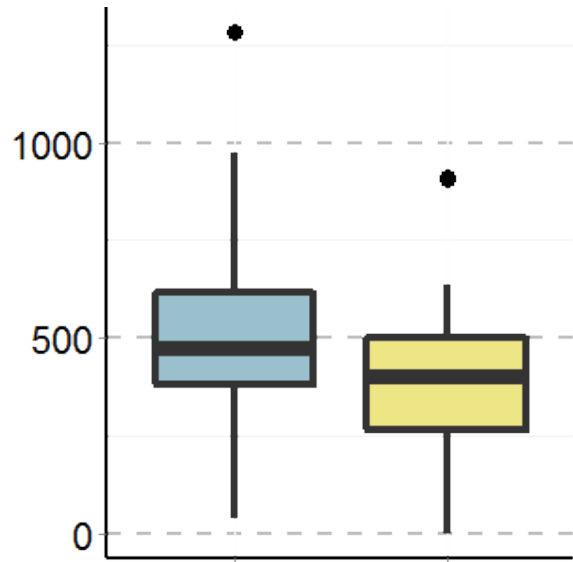

267824

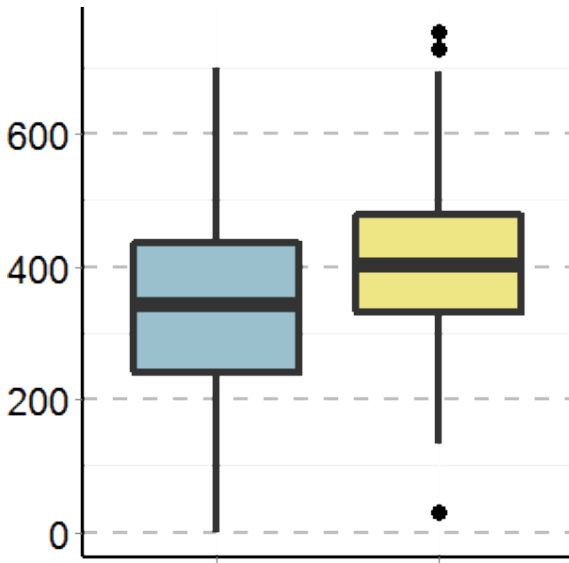

268506

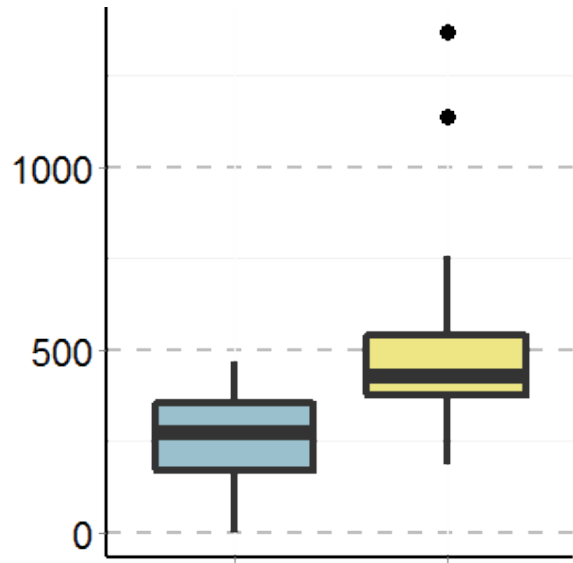

269776

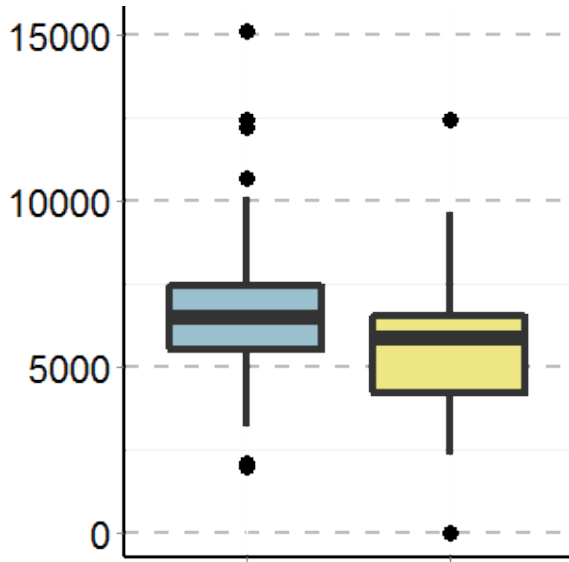

270977

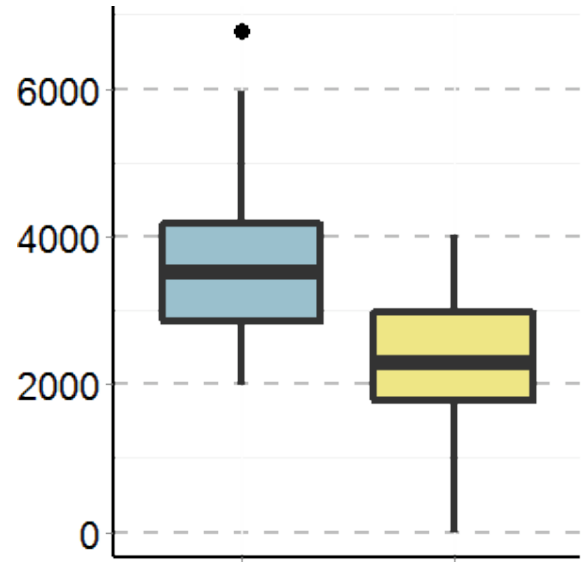

288019

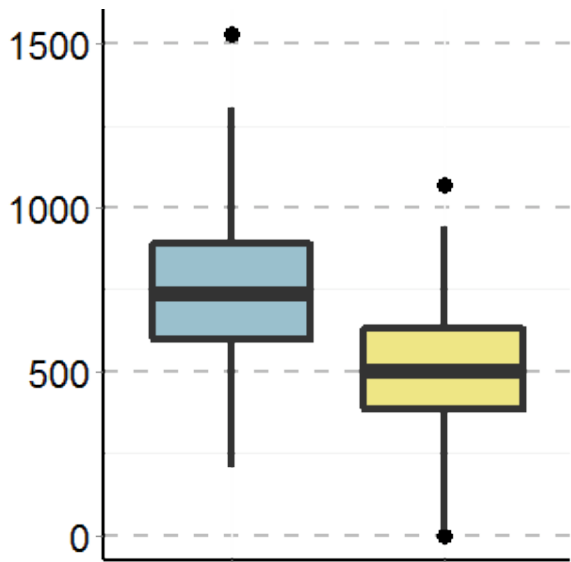

288808

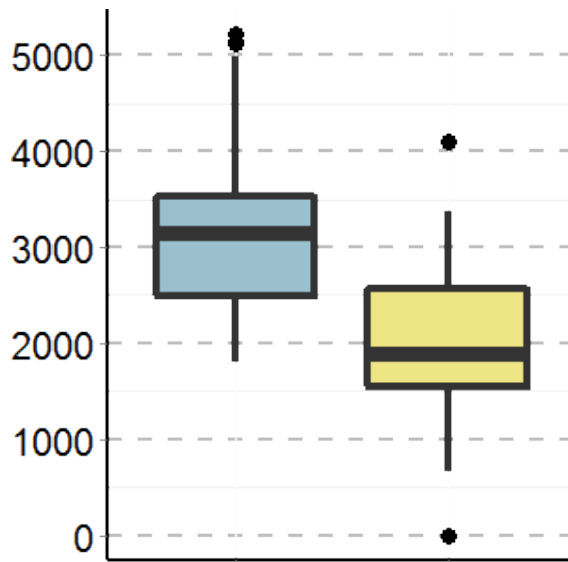

288810

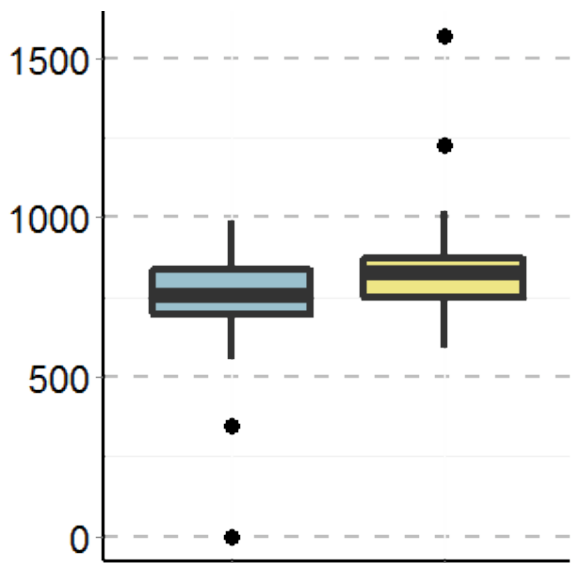

293848

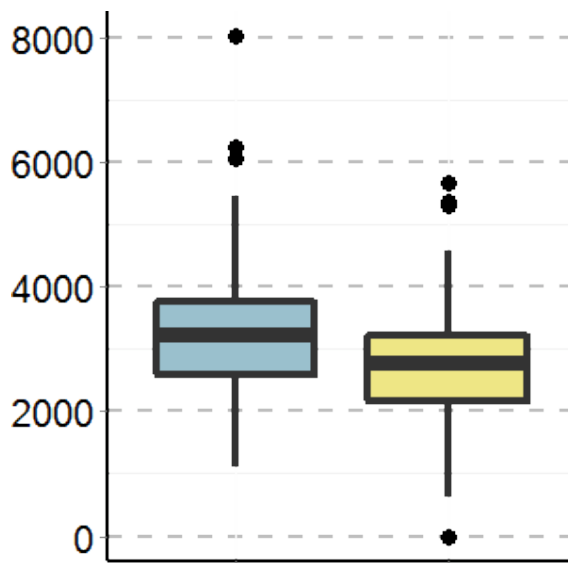

300108

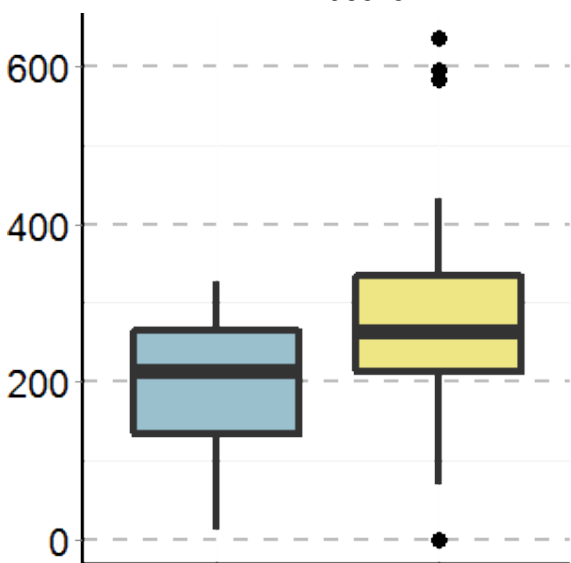

308912

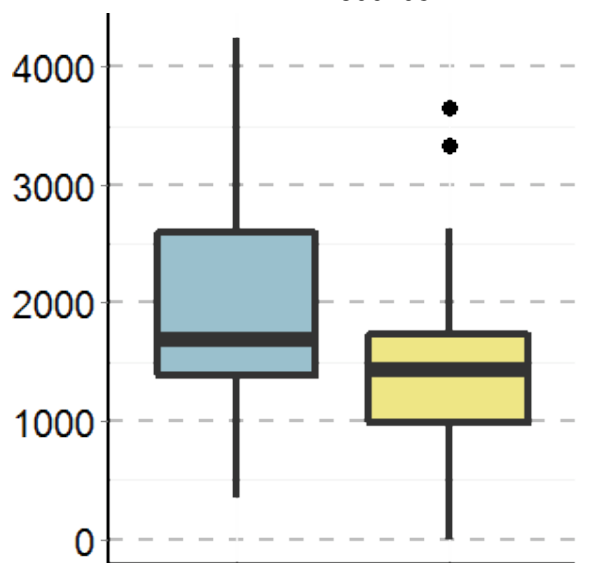

309642

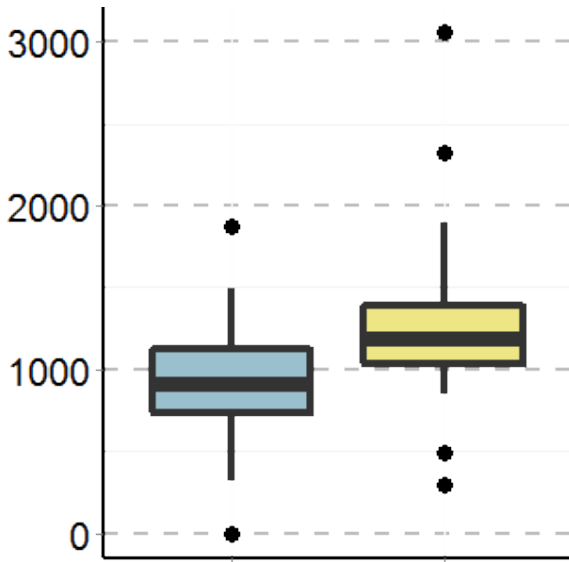

348578

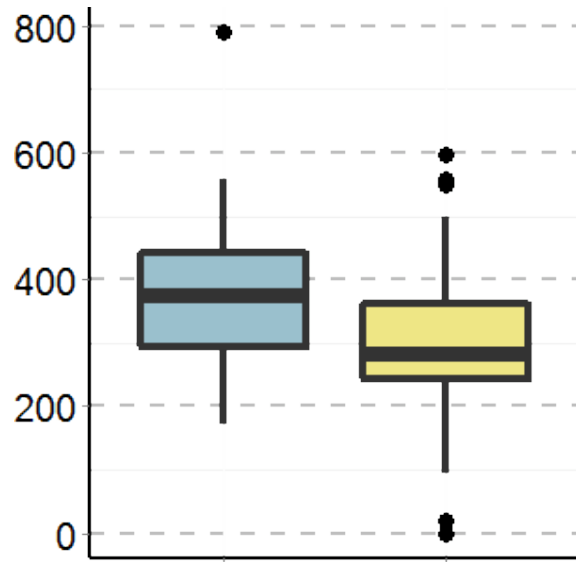

349887

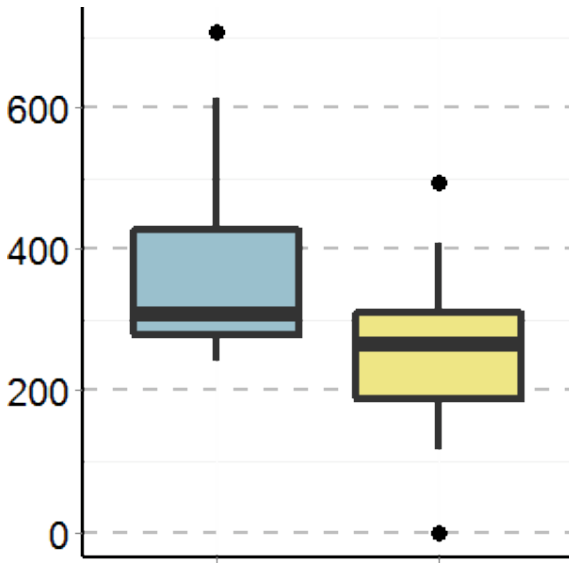

349922

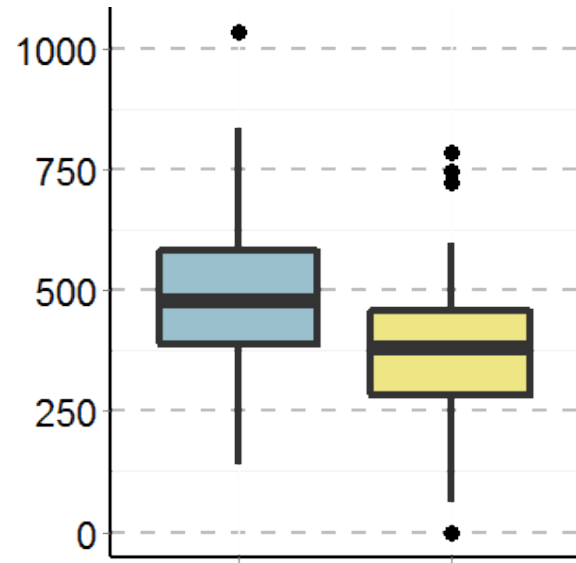

356925

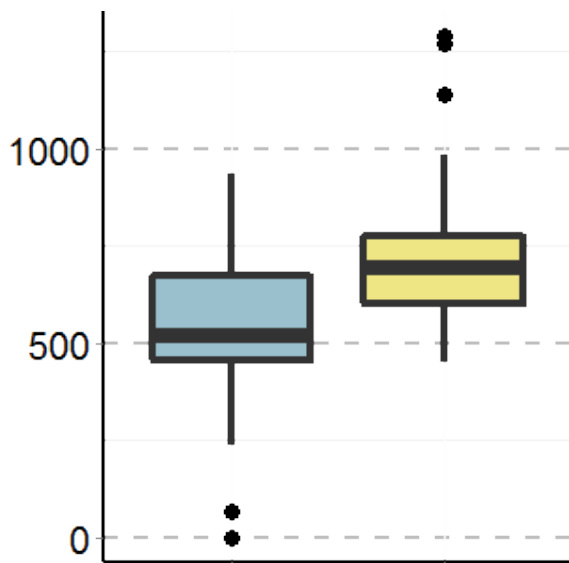

356987

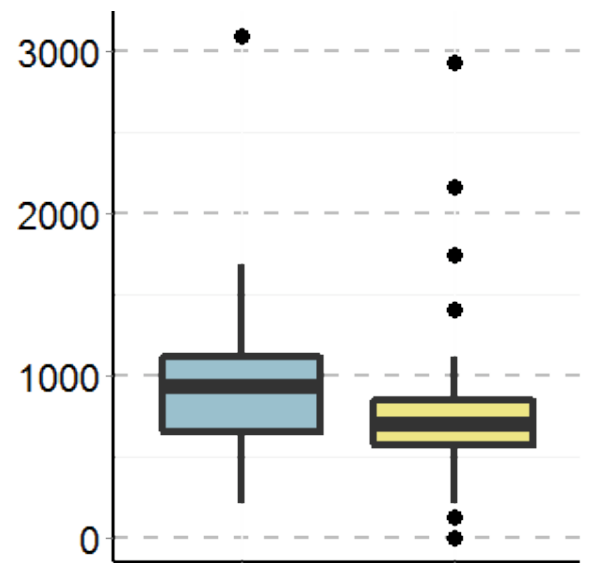

359447

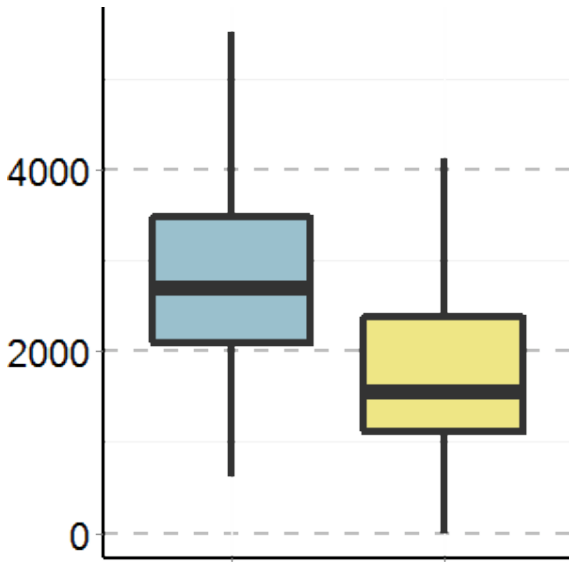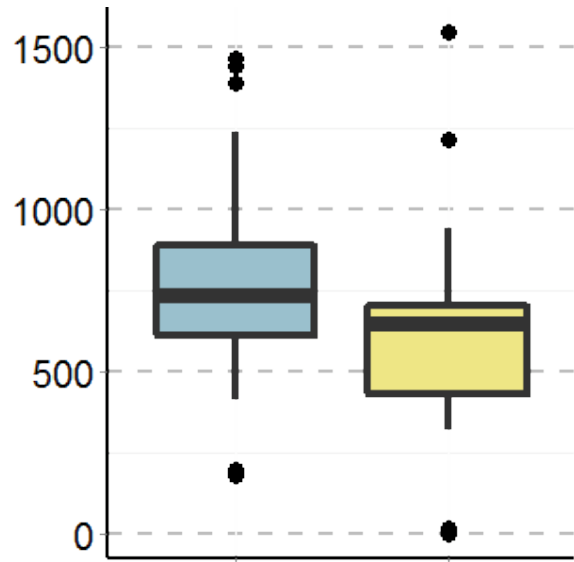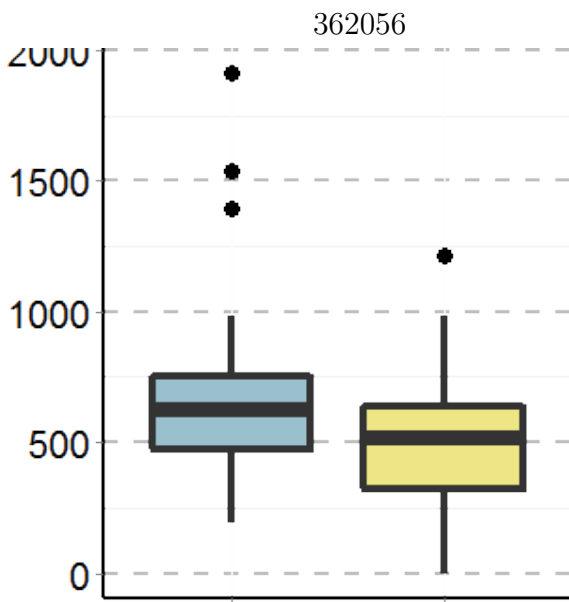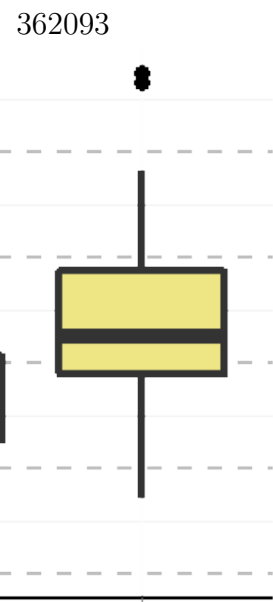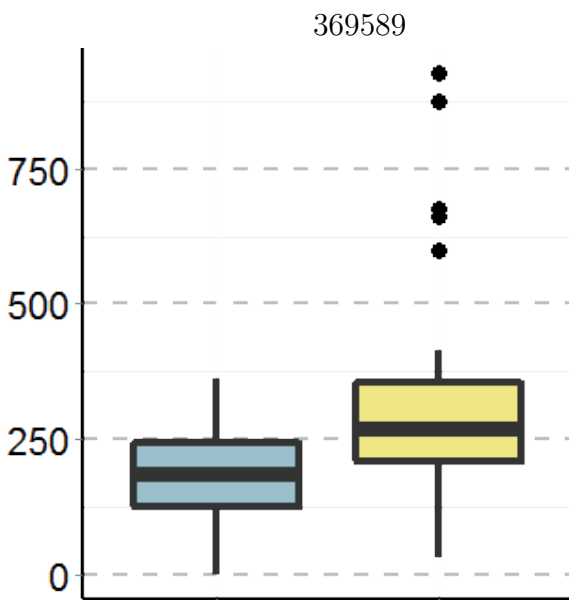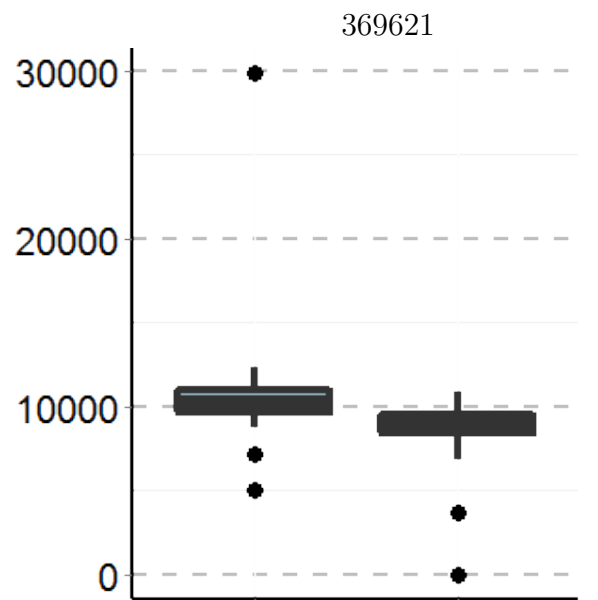

385065

437302

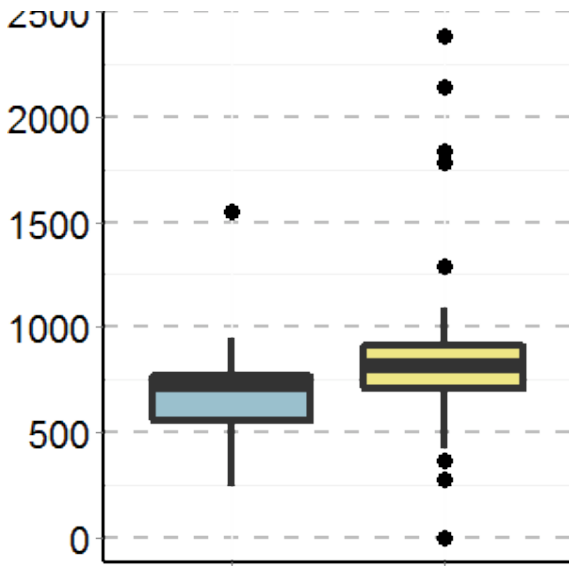

455826

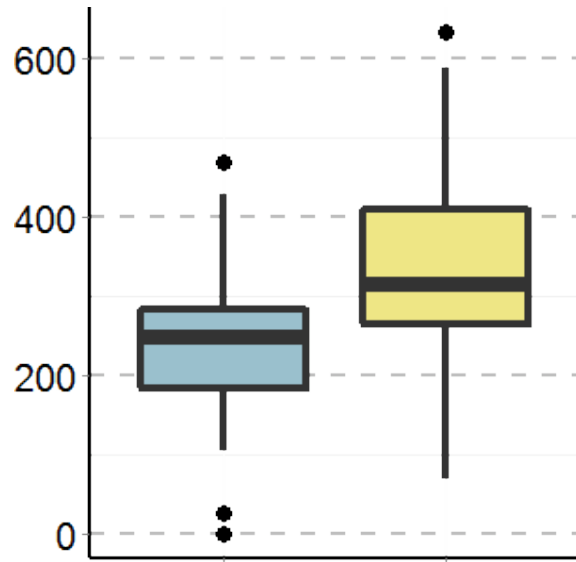

474826

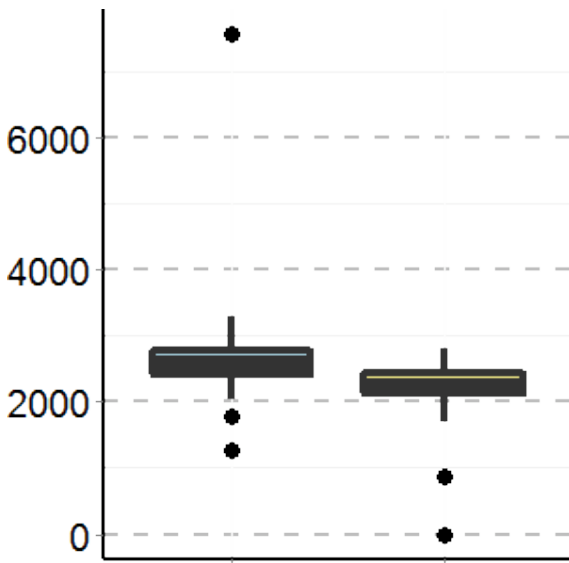

607692

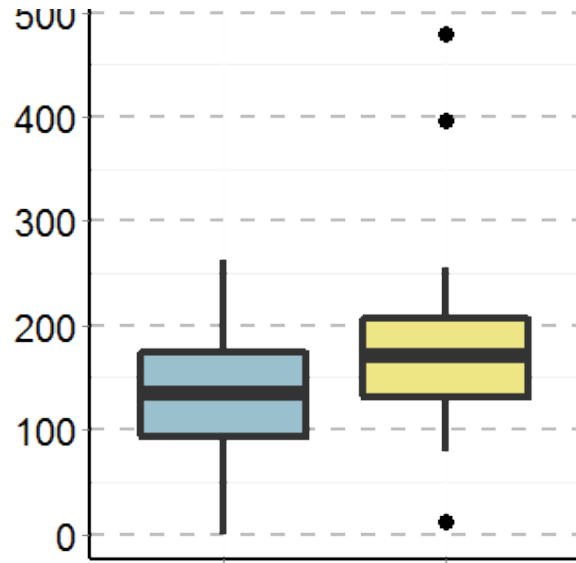

616706

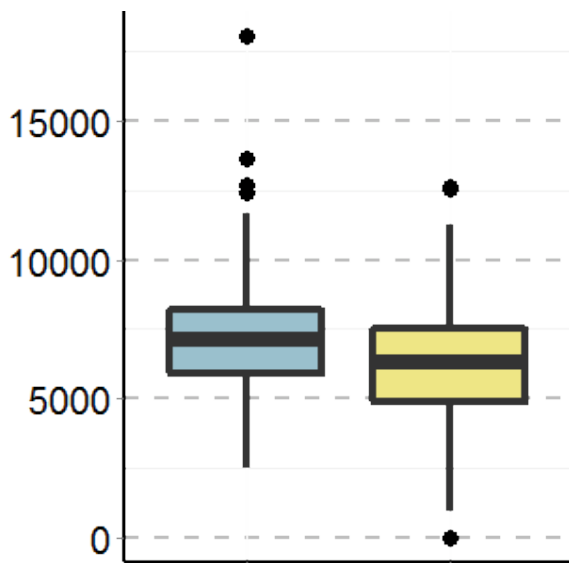

616800

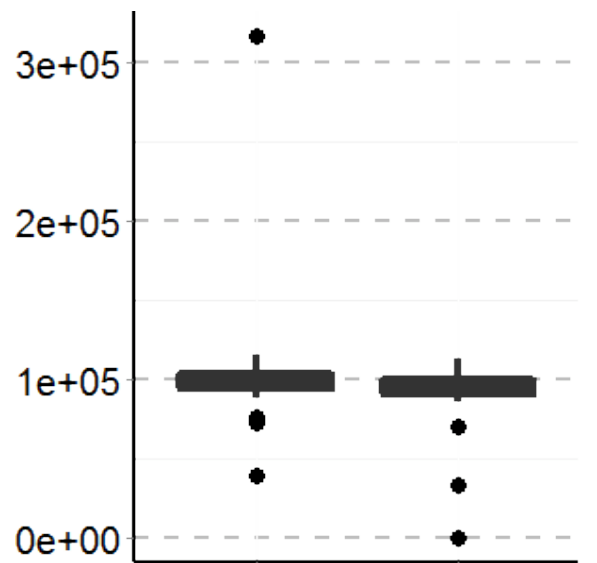

622135



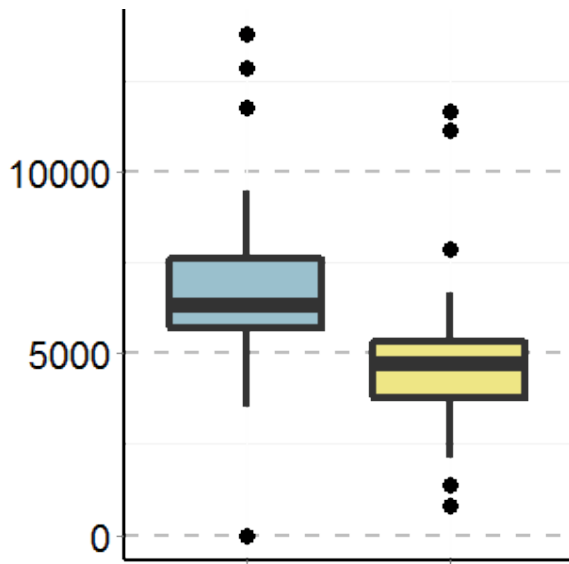

624232

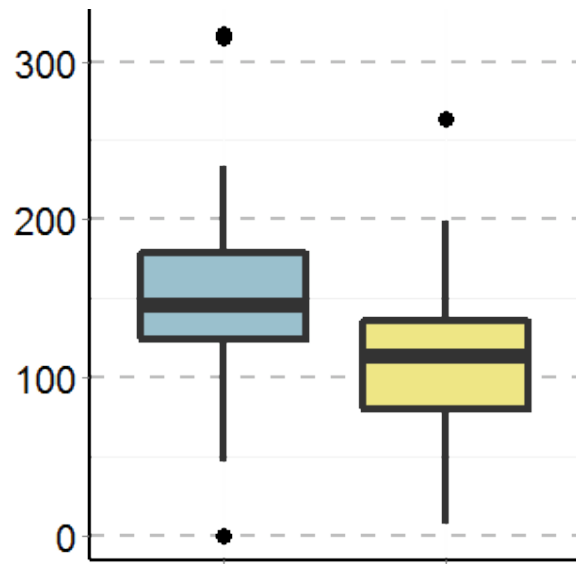

626305

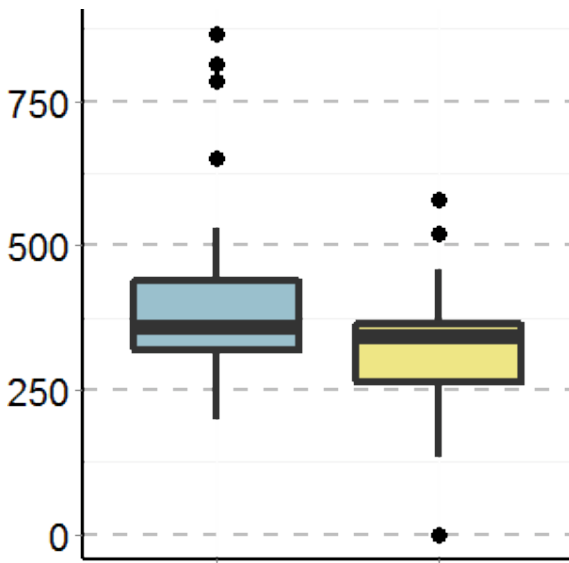

626325

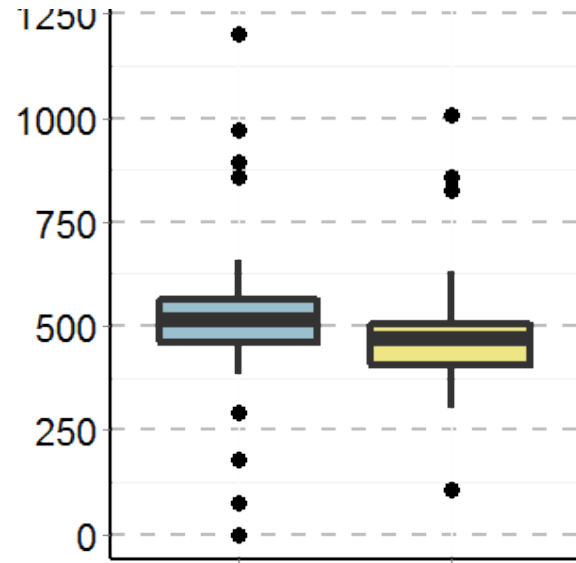

640528

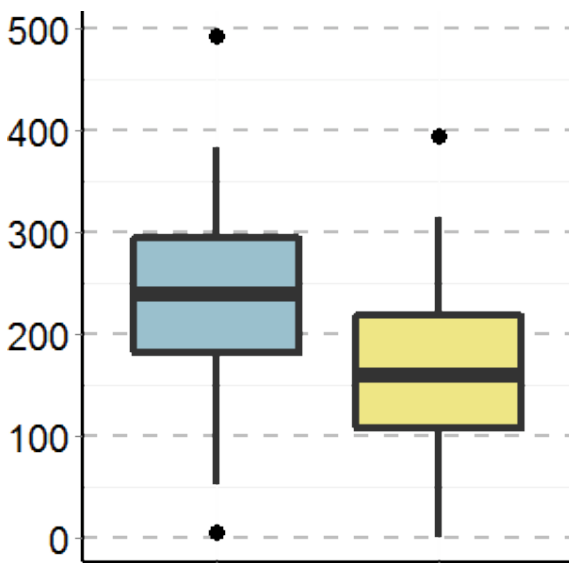

650627

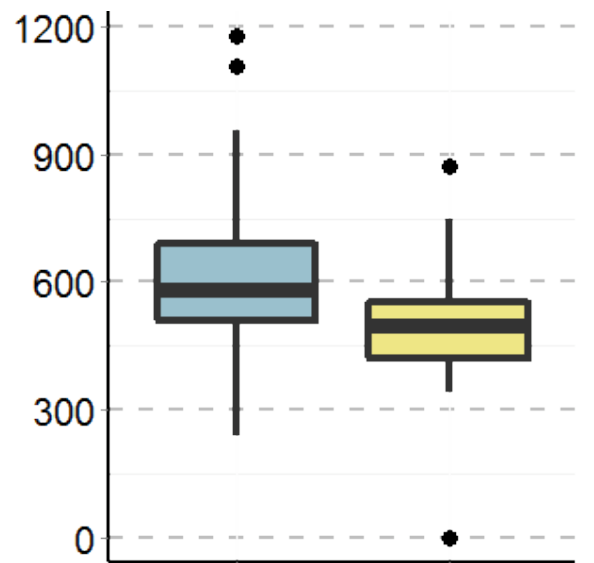

704387
